# Supplementary material
Source: publisher site journal article supplement (https://www.dovepress.com/get_supplementary_file.php?f=421932.docx)
Supplement: Supplementary file 1 [file get_supplementary_file.php]

**Appendix Table 1a & b** Skewness and kurtosis of burnout and psychological capital

**Appendix Fig. 1** Difference in edge weights

**Appendix Fig. 2** Variability of node strength centrality

**Appendix Fig. 3** Q-Q plots

**Appendix Fig. 4** Shepard Diagrams

**Appendix** **Fig. 5** MDS configuration

**Appendix table 1a**

*Skewness and kurtosis ((N = 1729)*

|  | Burnout_1 | Burnout_2 | Burnout_3 | Burnout_4 | Burnout_5 | Burnout_6 | Burnout_7 | Burnout_8 | Burnout_9 | Burnout_10 | M_ Burnout |
| --- | --- | --- | --- | --- | --- | --- | --- | --- | --- | --- | --- |
| Skewness | 0.48 | 0.58 | 0.65 | 0.48 | 0.78 | 0.44 | 0.25 | 0.33 | 0.47 | 0.77 | 0.06 |
| *S.E.* of Skewness | 0.04 | 0.04 | 0.04 | 0.04 | 0.04 | 0.04 | 0.04 | 0.04 | 0.04 | 0.04 | 0.04 |
| Kurtosis | -0.29 | -0.23 | -0.26 | -0.57 | 0.07 | -0.37 | -0.70 | -0.50 | -0.68 | -0.03 | -0.71 |
| *S.E.* of Kurtosis | 0.08 | 0.08 | 0.08 | 0.08 | 0.08 | 0.08 | 0.08 | 0.08 | 0.08 | 0.08 | 0.08 |

*Note:* *M* means Mean; *S.E.* means Standard error.

**Appendix Table 1b**

*Skewness and kurtosis of psychological capital scale ((N = 1729)*

|  | Item1 | Item2 | Item3 | Item4 | Item5 | Item6 | Item7 | Item8 | Item9 | Item10 | Item11 | Item12 | Item13 | Item14 | Item15 | Item16 | Item17 | Item18 | | Item19 | *M* |
| --- | --- | --- | --- | --- | --- | --- | --- | --- | --- | --- | --- | --- | --- | --- | --- | --- | --- | --- | --- | --- | --- |
| Skewness | -1.20 | -0.80 | -0.52 | -0.44 | -0.16 | -0.96 | -0.24 | -0.61 | -0.47 | -0.73 | -1.13 | -1.13 | -0.69 | -0.86 | -1.18 | -1.02 | -0.87 | | -0.76 | -0.80 | -0.24 |
| Skewness  (*S.E.*) | 0.04 | 0.04 | 0.04 | 0.04 | 0.04 | 0.04 | 0.04 | 0.04 | 0.04 | 0.04 | 0.04 | 0.04 | 0.04 | 0.04 | 0.04 | 0.04 | 0.04 | | 0.04 | 0.04 | 0.04 |
| Kurtosis | 1.31 | -0.03 | -0.80 | -0.62 | -0.93 | 0.39 | -0.94 | -0.35 | -0.71 | -0.40 | 1.02 | 0.87 | -0.19 | 0.27 | 1.05 | 0.72 | 0.23 | | 0.12 | 0.09 | -0.57 |
| Kurtosis  (*S.E.*) | 0.08 | 0.08 | 0.08 | 0.08 | 0.08 | 0.08 | 0.08 | 0.08 | 0.08 | 0.08 | 0.08 | 0.08 | 0.08 | 0.08 | 0.08 | 0.08 | 0.08 | | 0.08 | 0.08 | 0.08 |

*Note:* *M* means Mean; *S.E.* means Standard error.

**
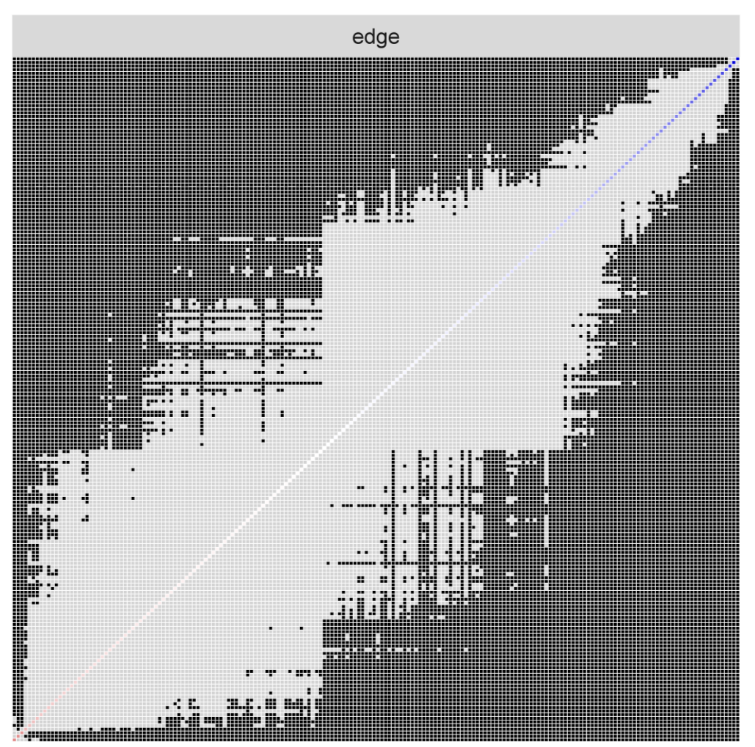
**

**Appendix** **Fig. 1** Differences in edge weights by bootstrap differential test. Coordinate axis labels have been removed to avoid clutter.

**
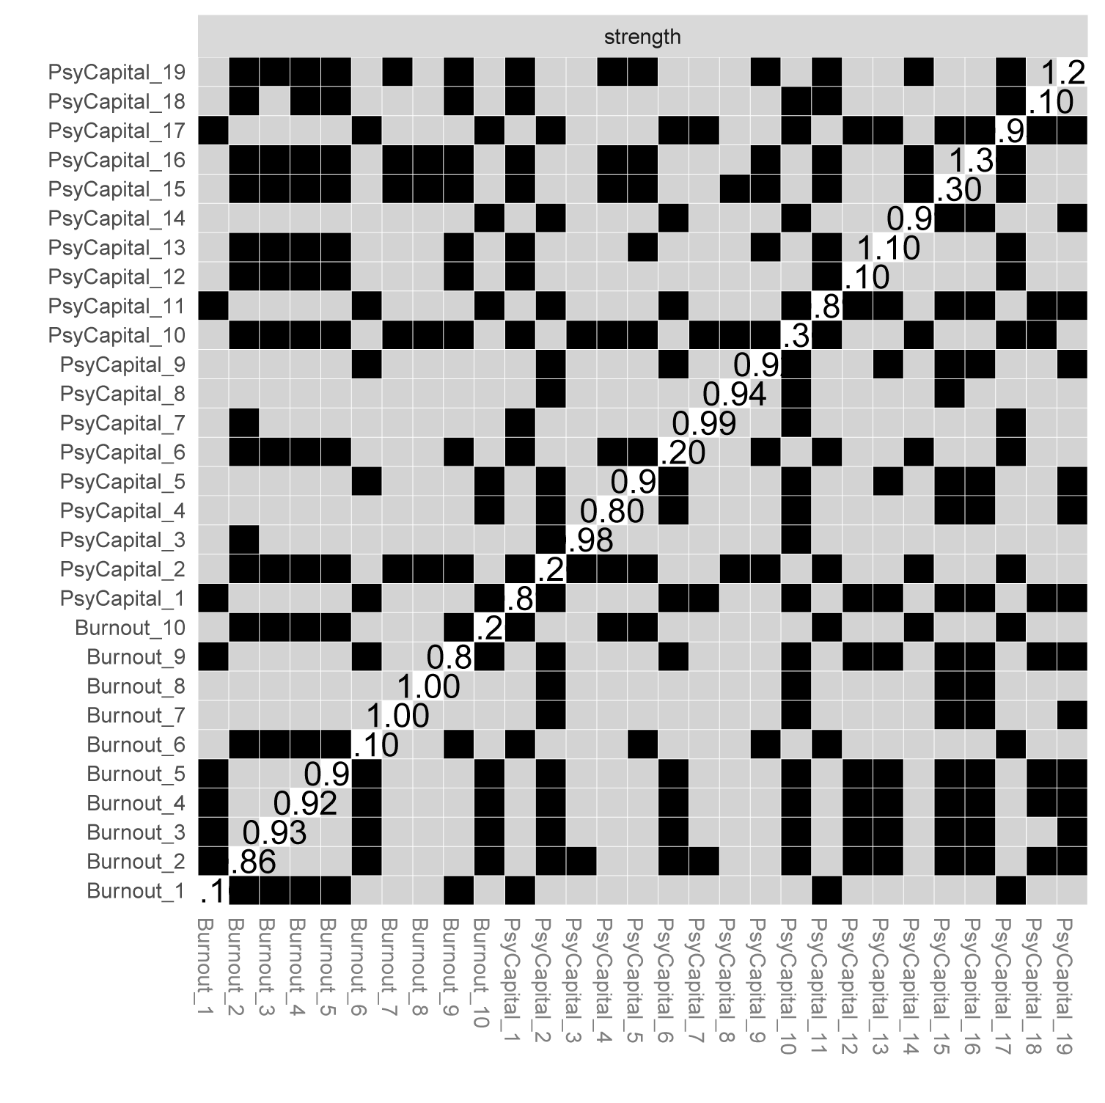
**

**Appendix** **Fig. 2** Tests of variability in node strength centrality in networks for burnout and PsyCap symptoms. Grey boxes represent nodes or edges that are not significantly different from each other and black boxes represent nodes or edges that are significantly different from each other. The white boxes in the centrality plots represent the values of node strengths.

**
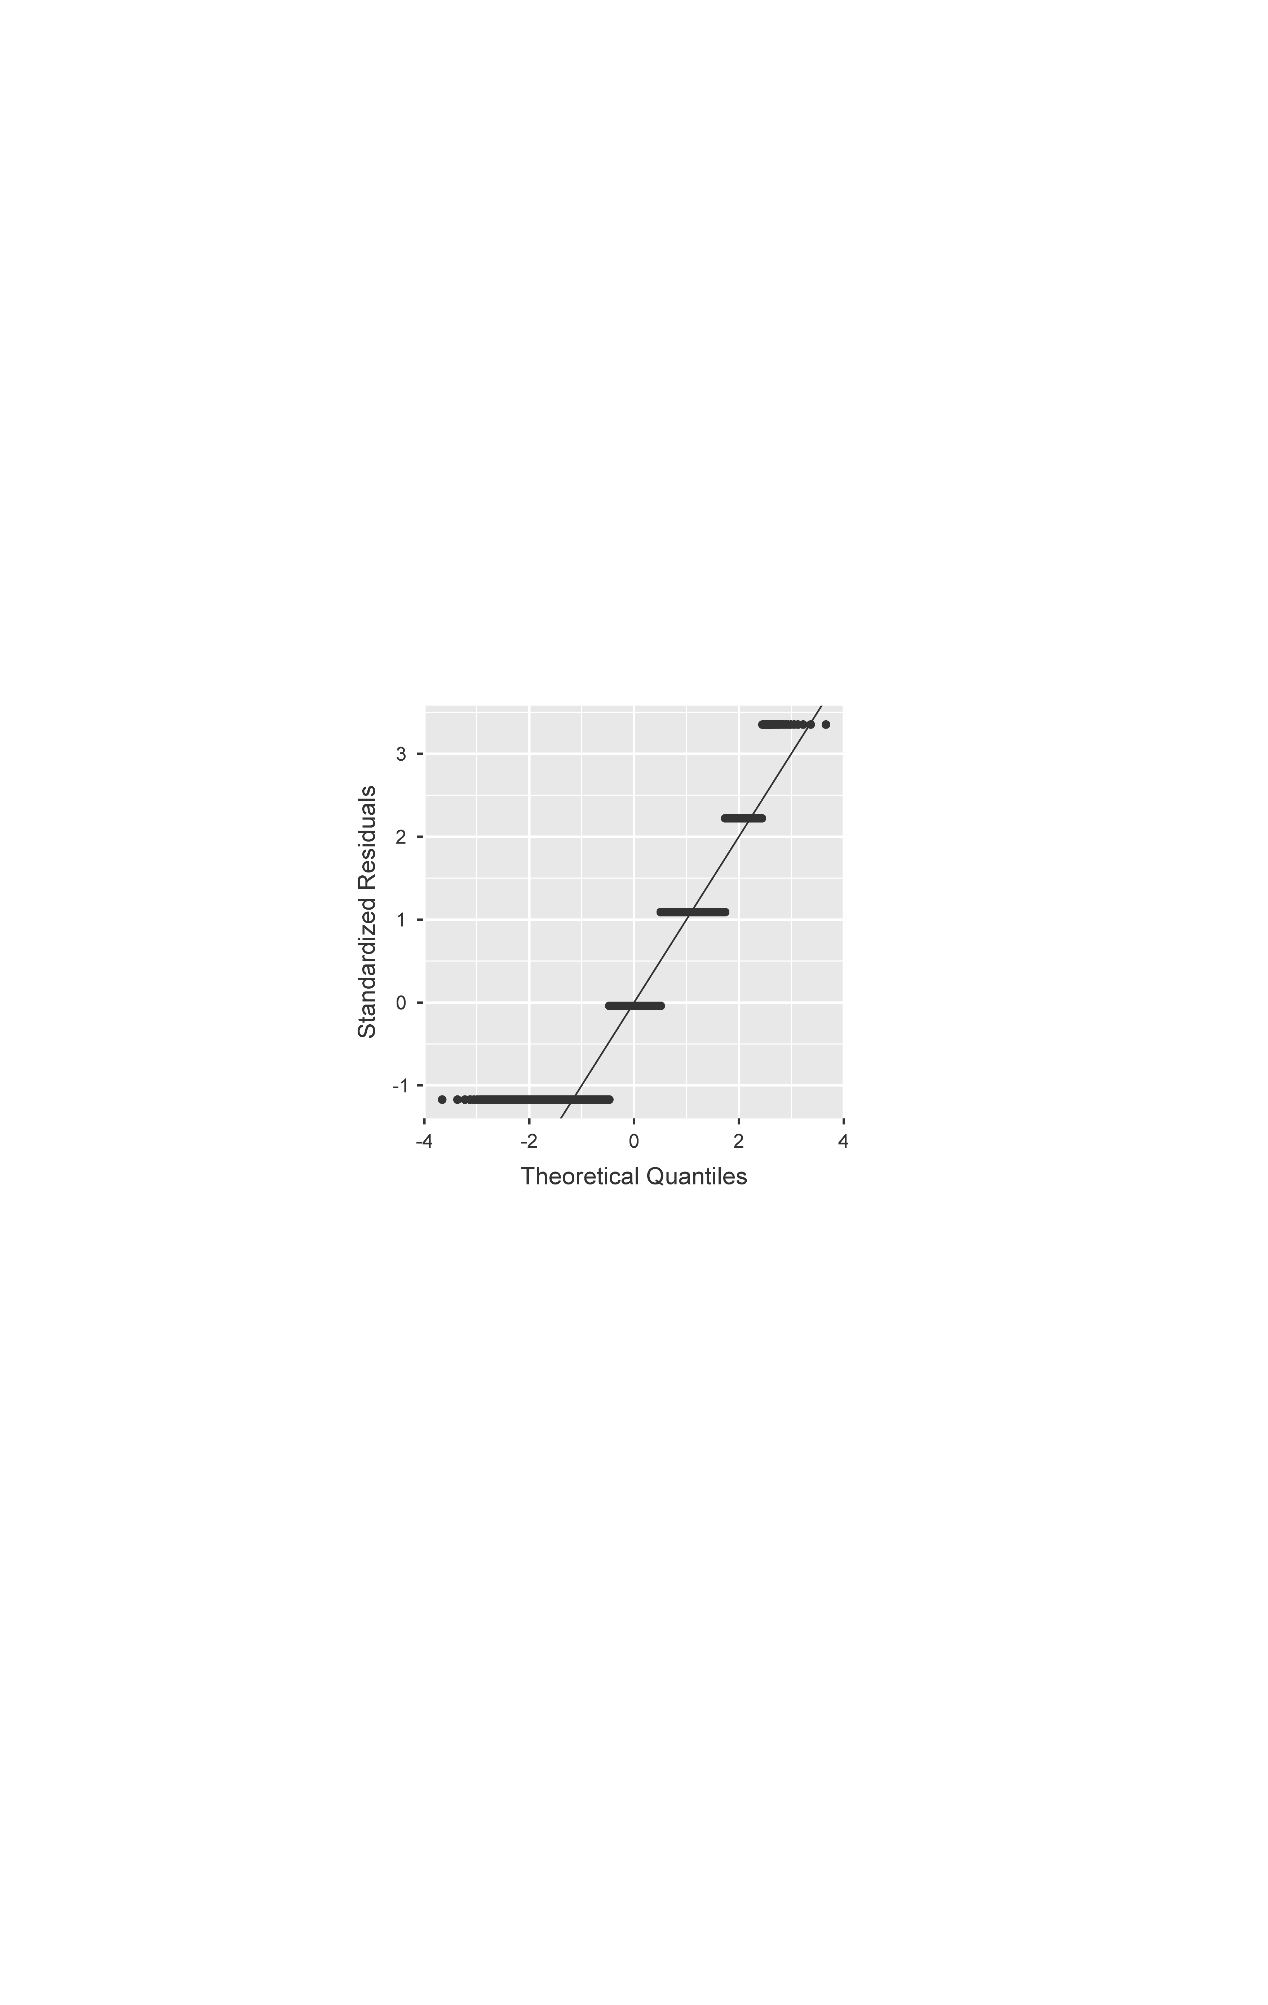
**

**Burnout_1**

**
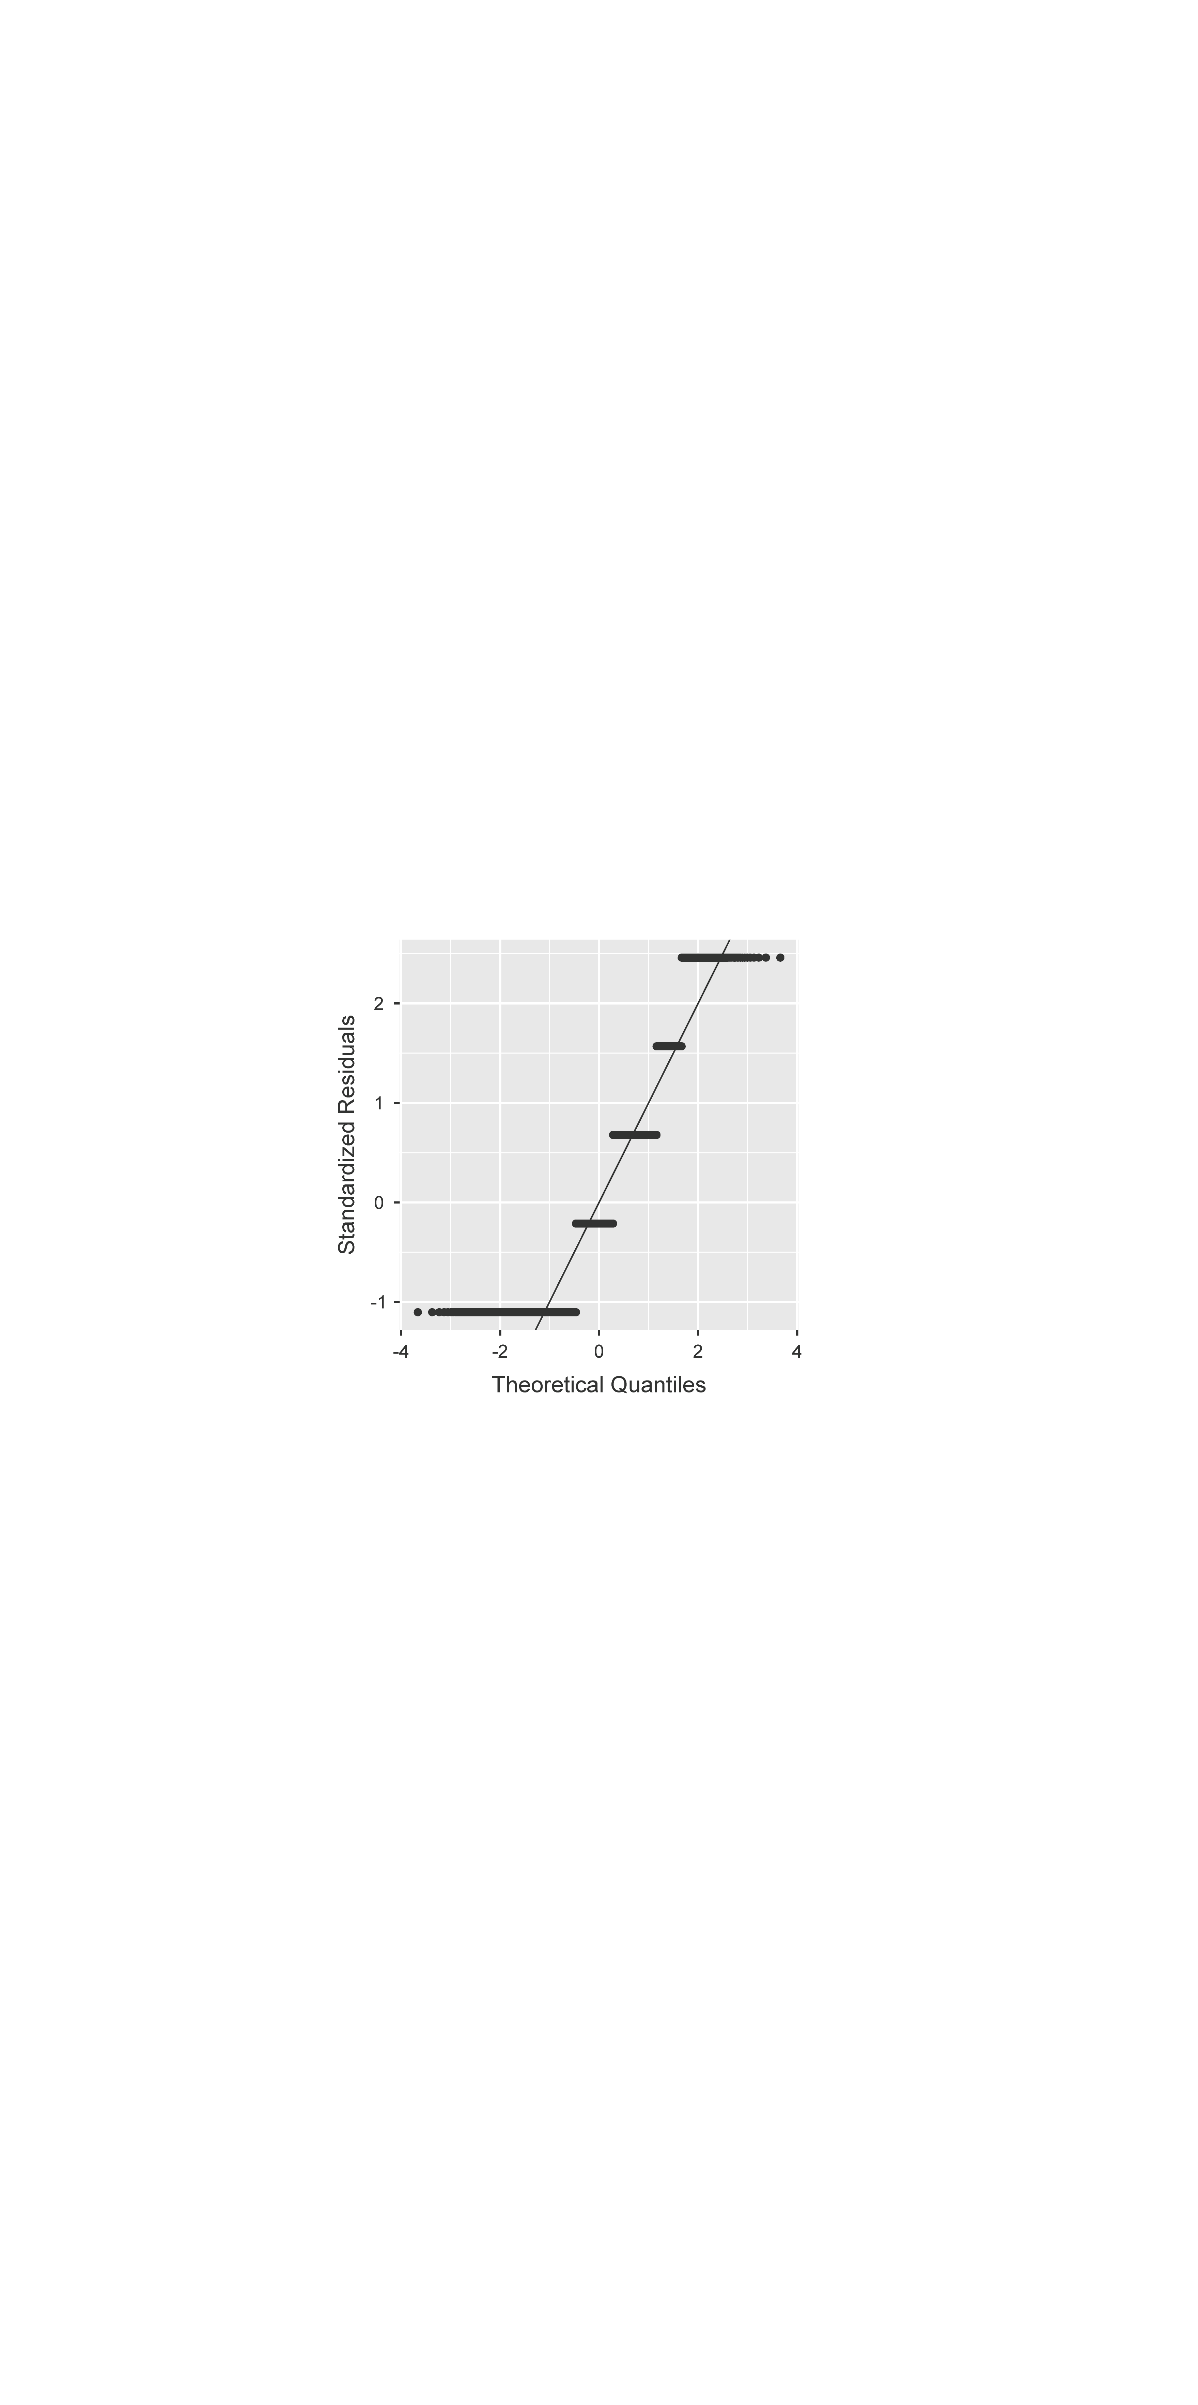
**

**Burnout_2**

**
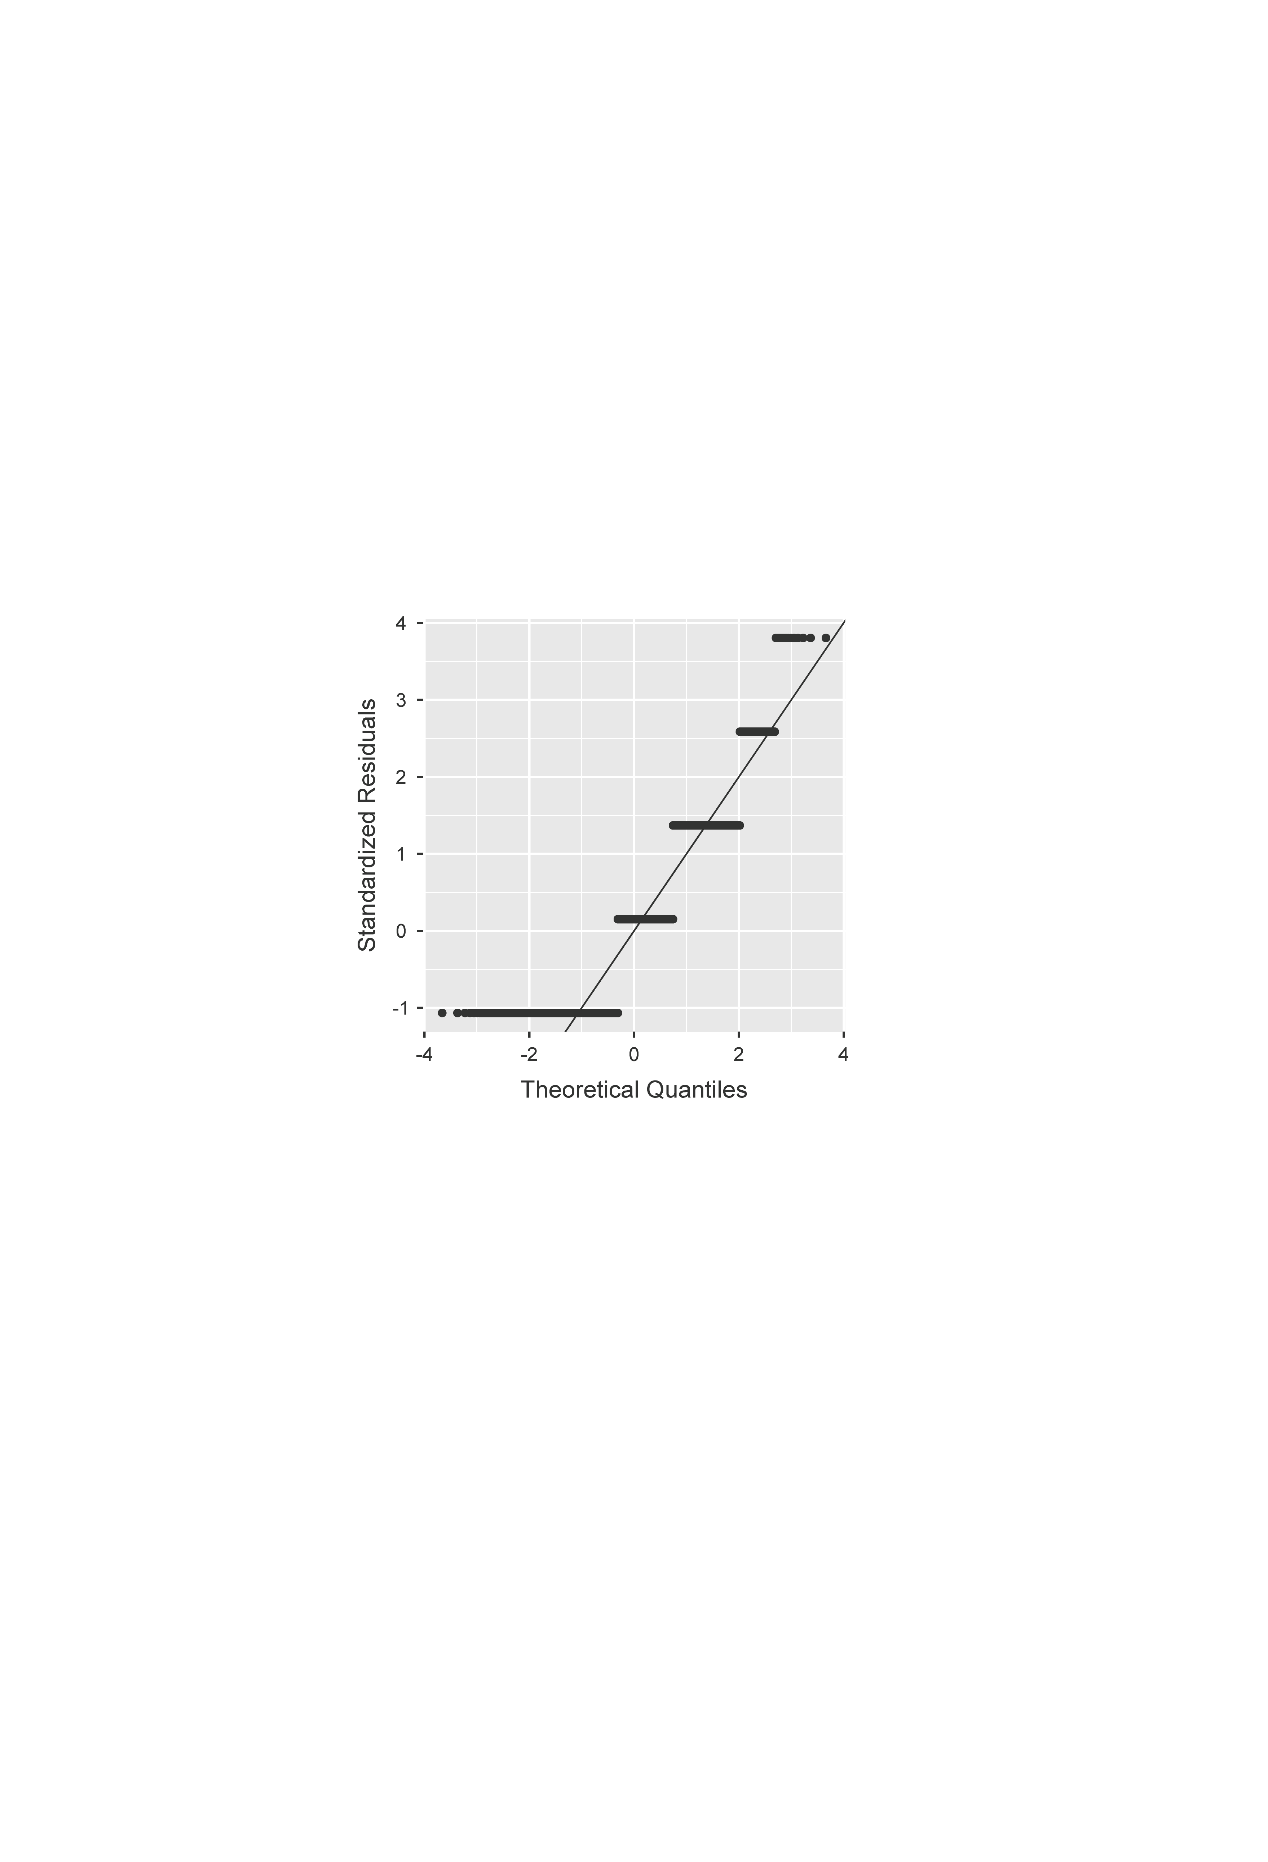
**

**Burnout_3**

**
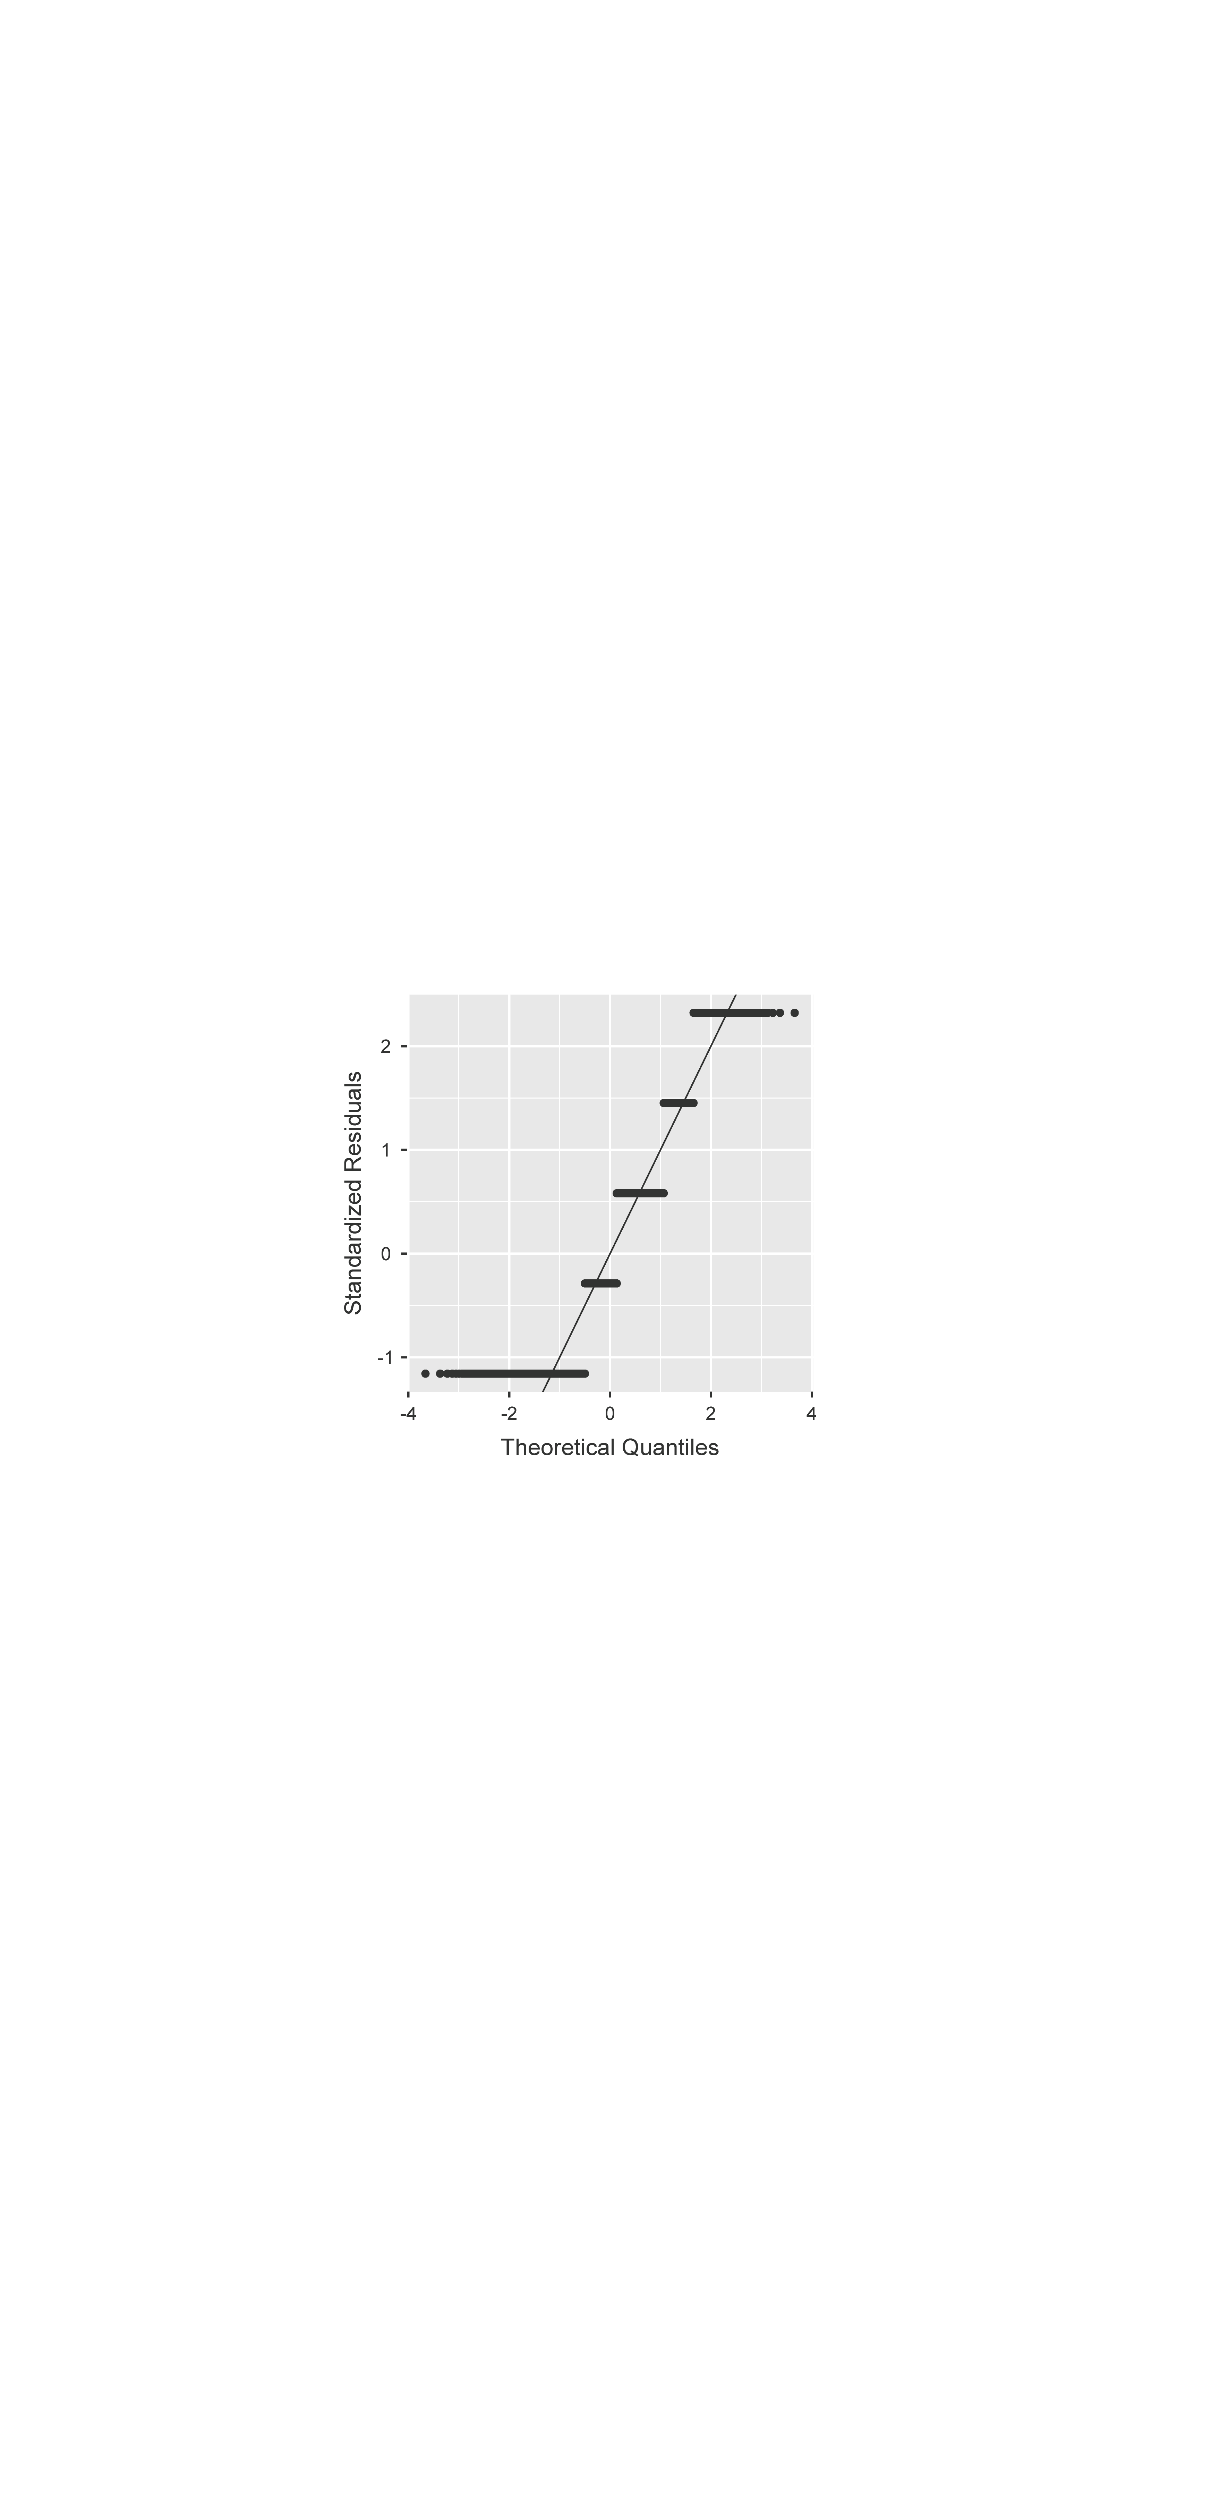
**

**Burnout_4**

**
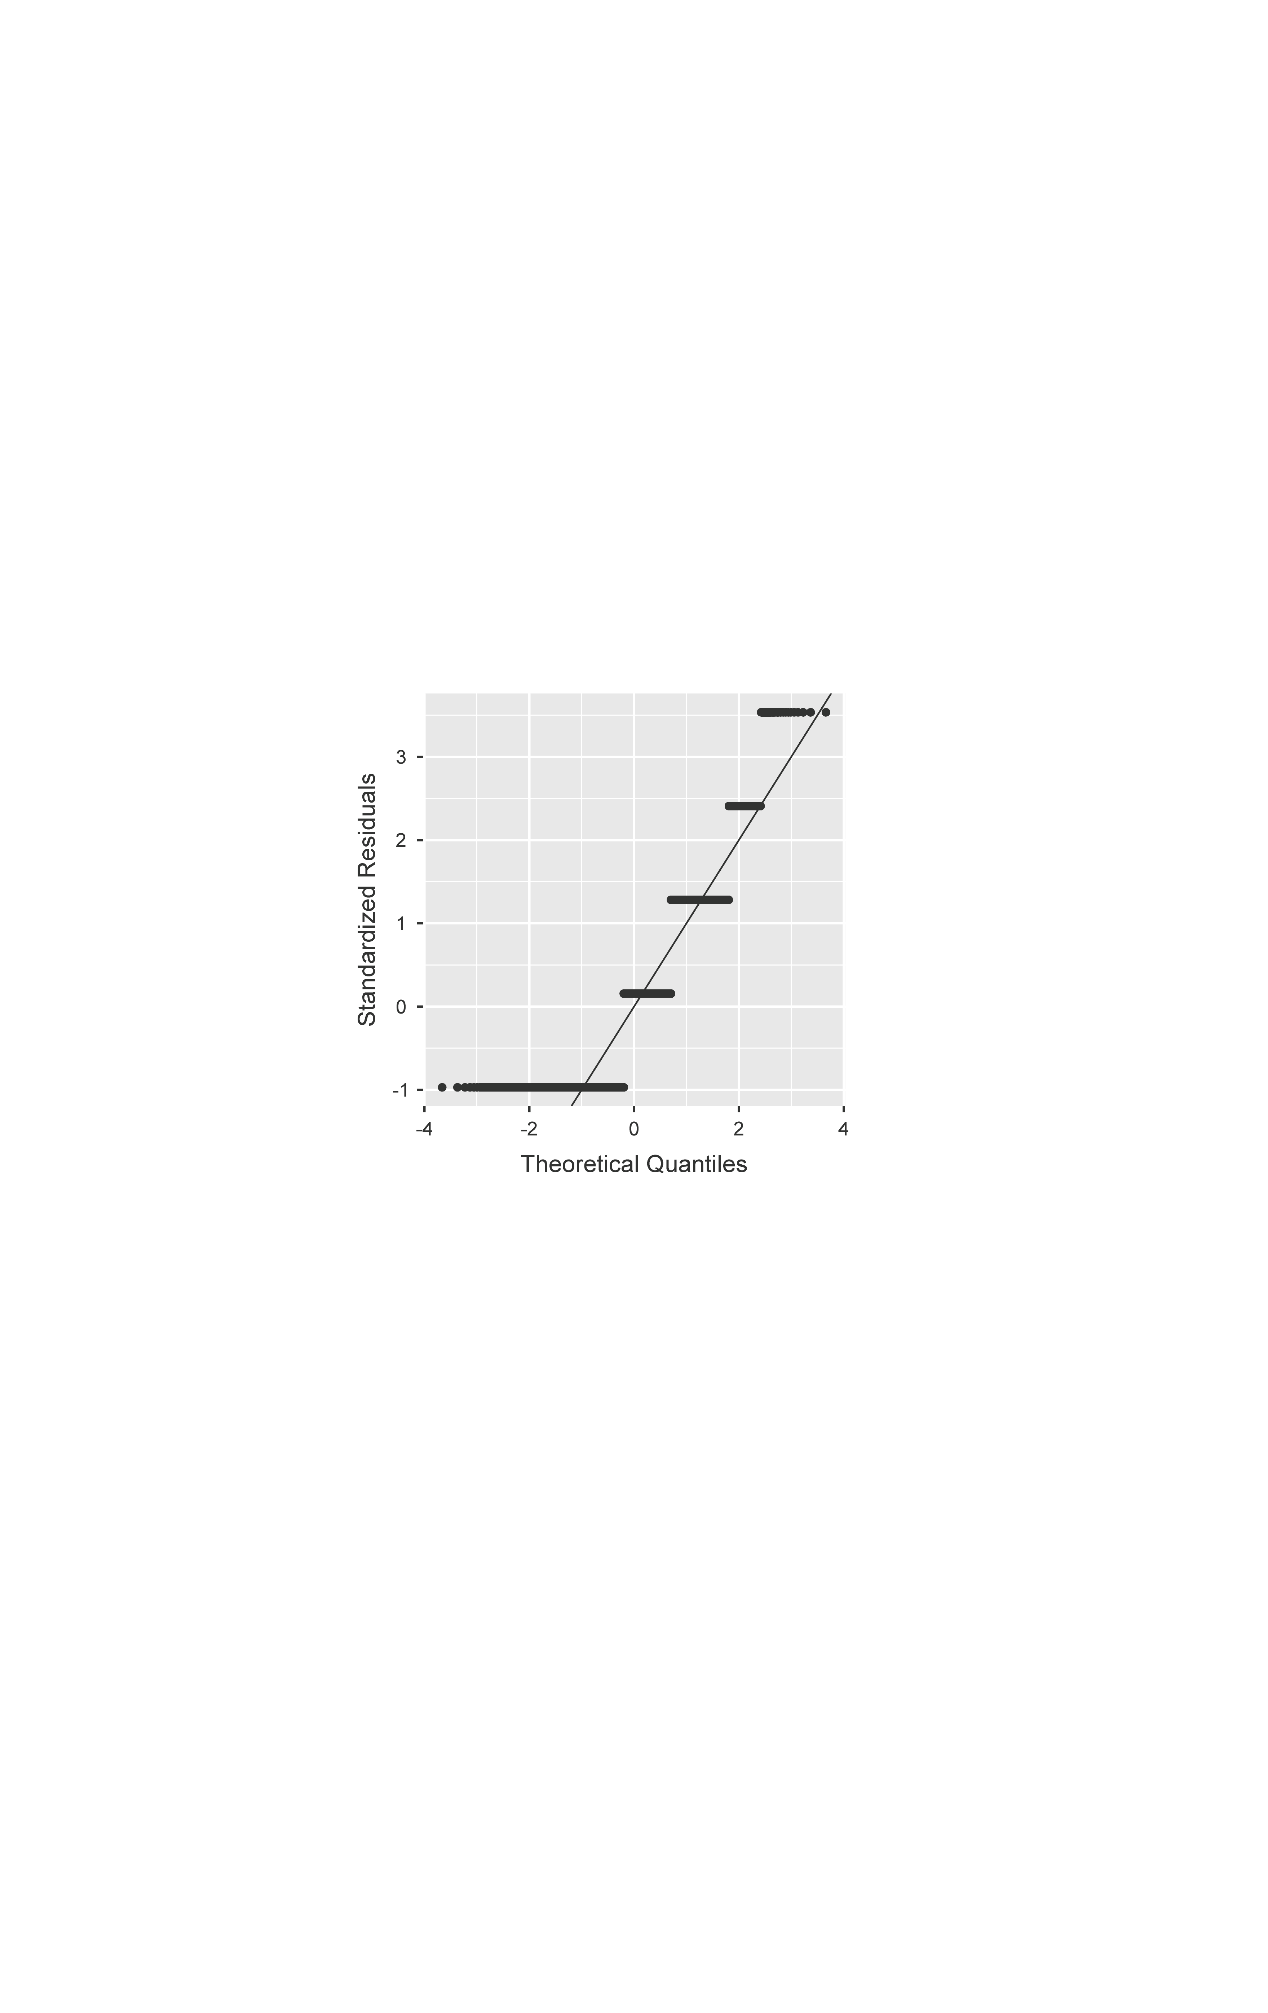
**

**Burnout_5**

**
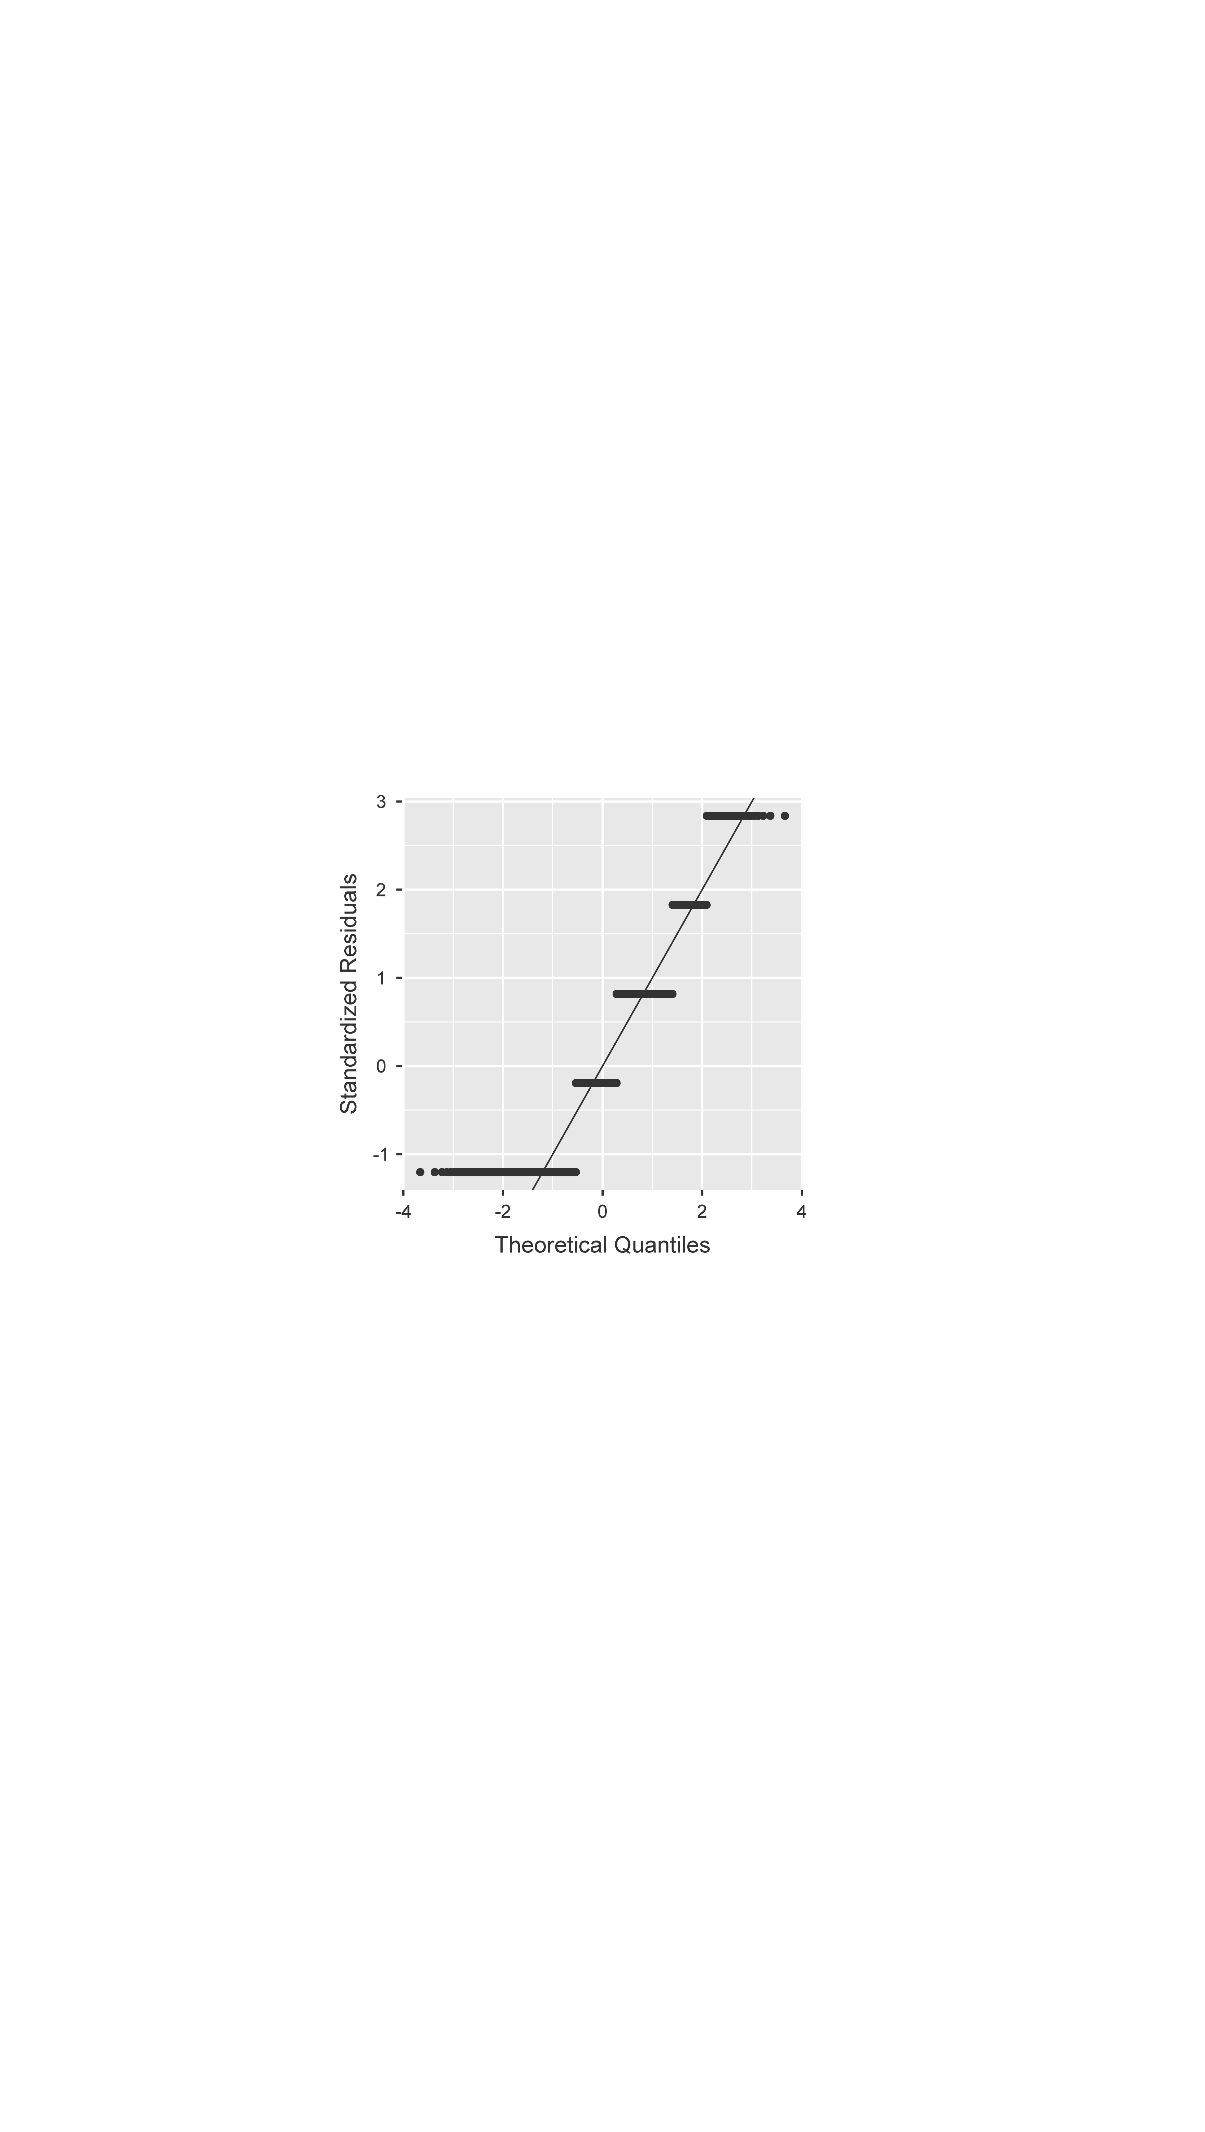
**

**Burnout_6**

**
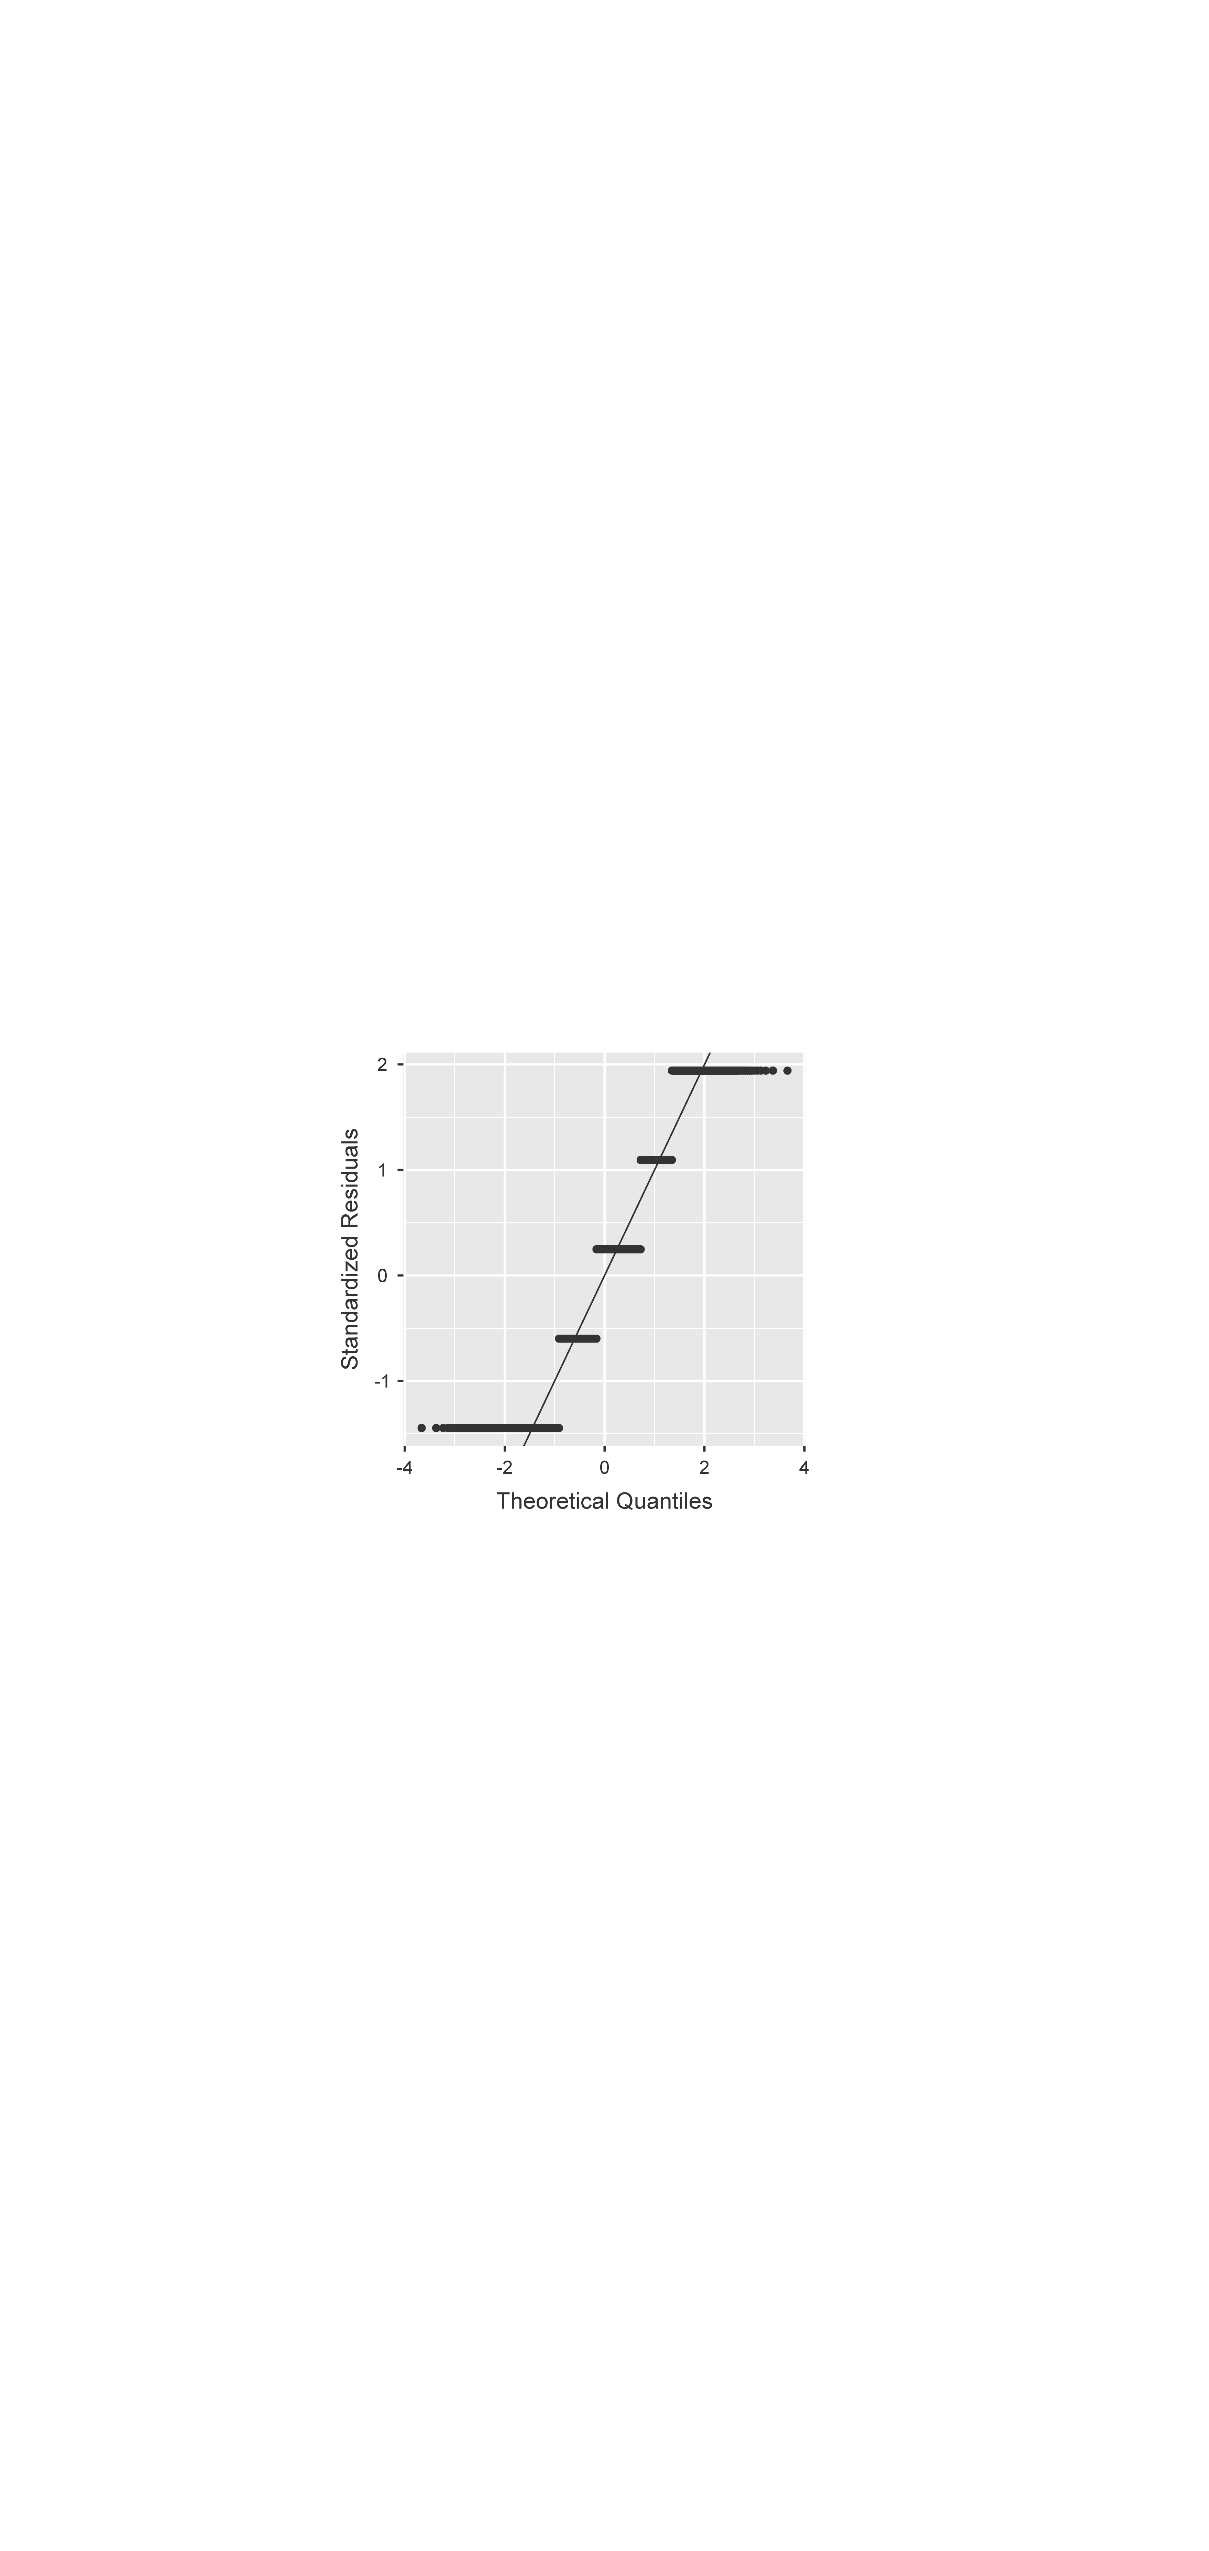
**

**Burnout_7**

**
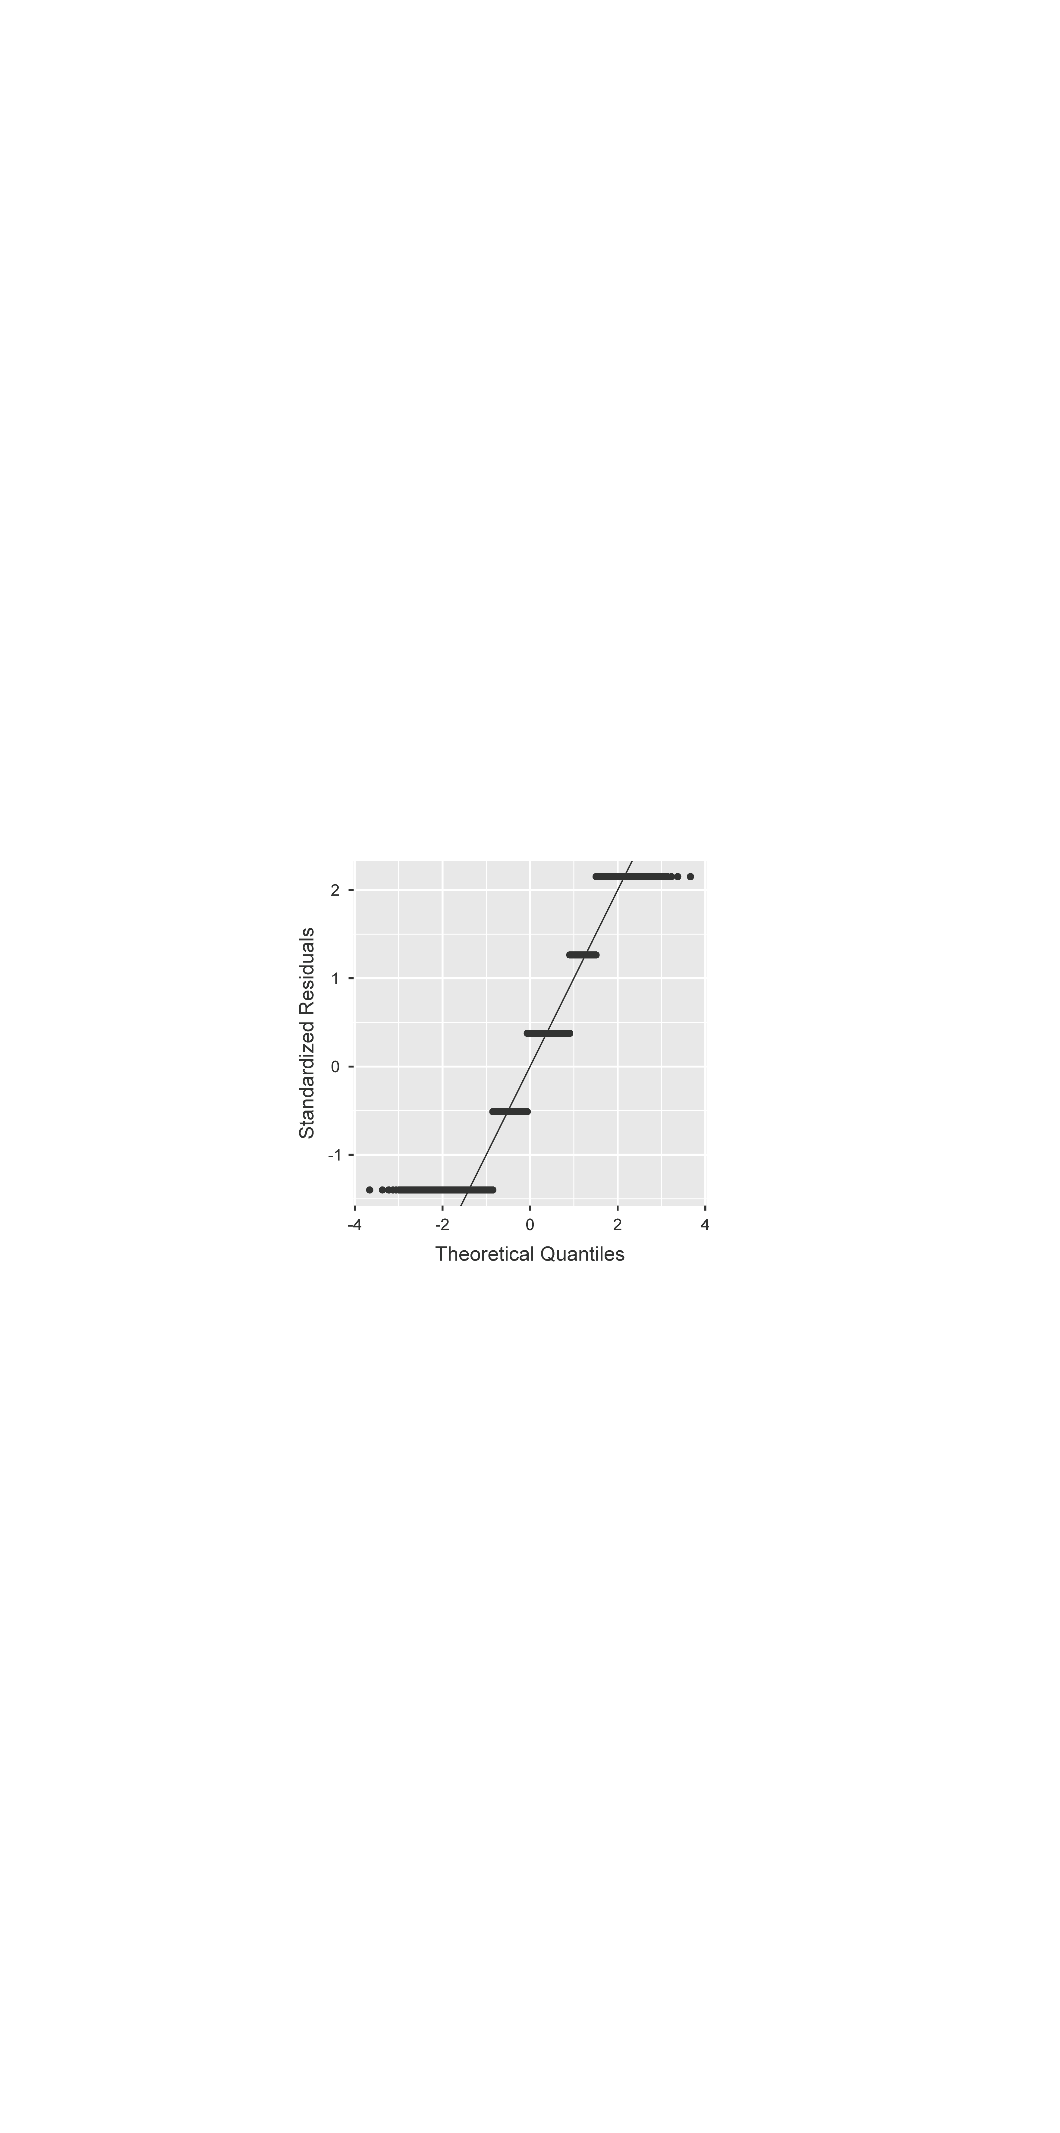
**

**Burnout_8**

**
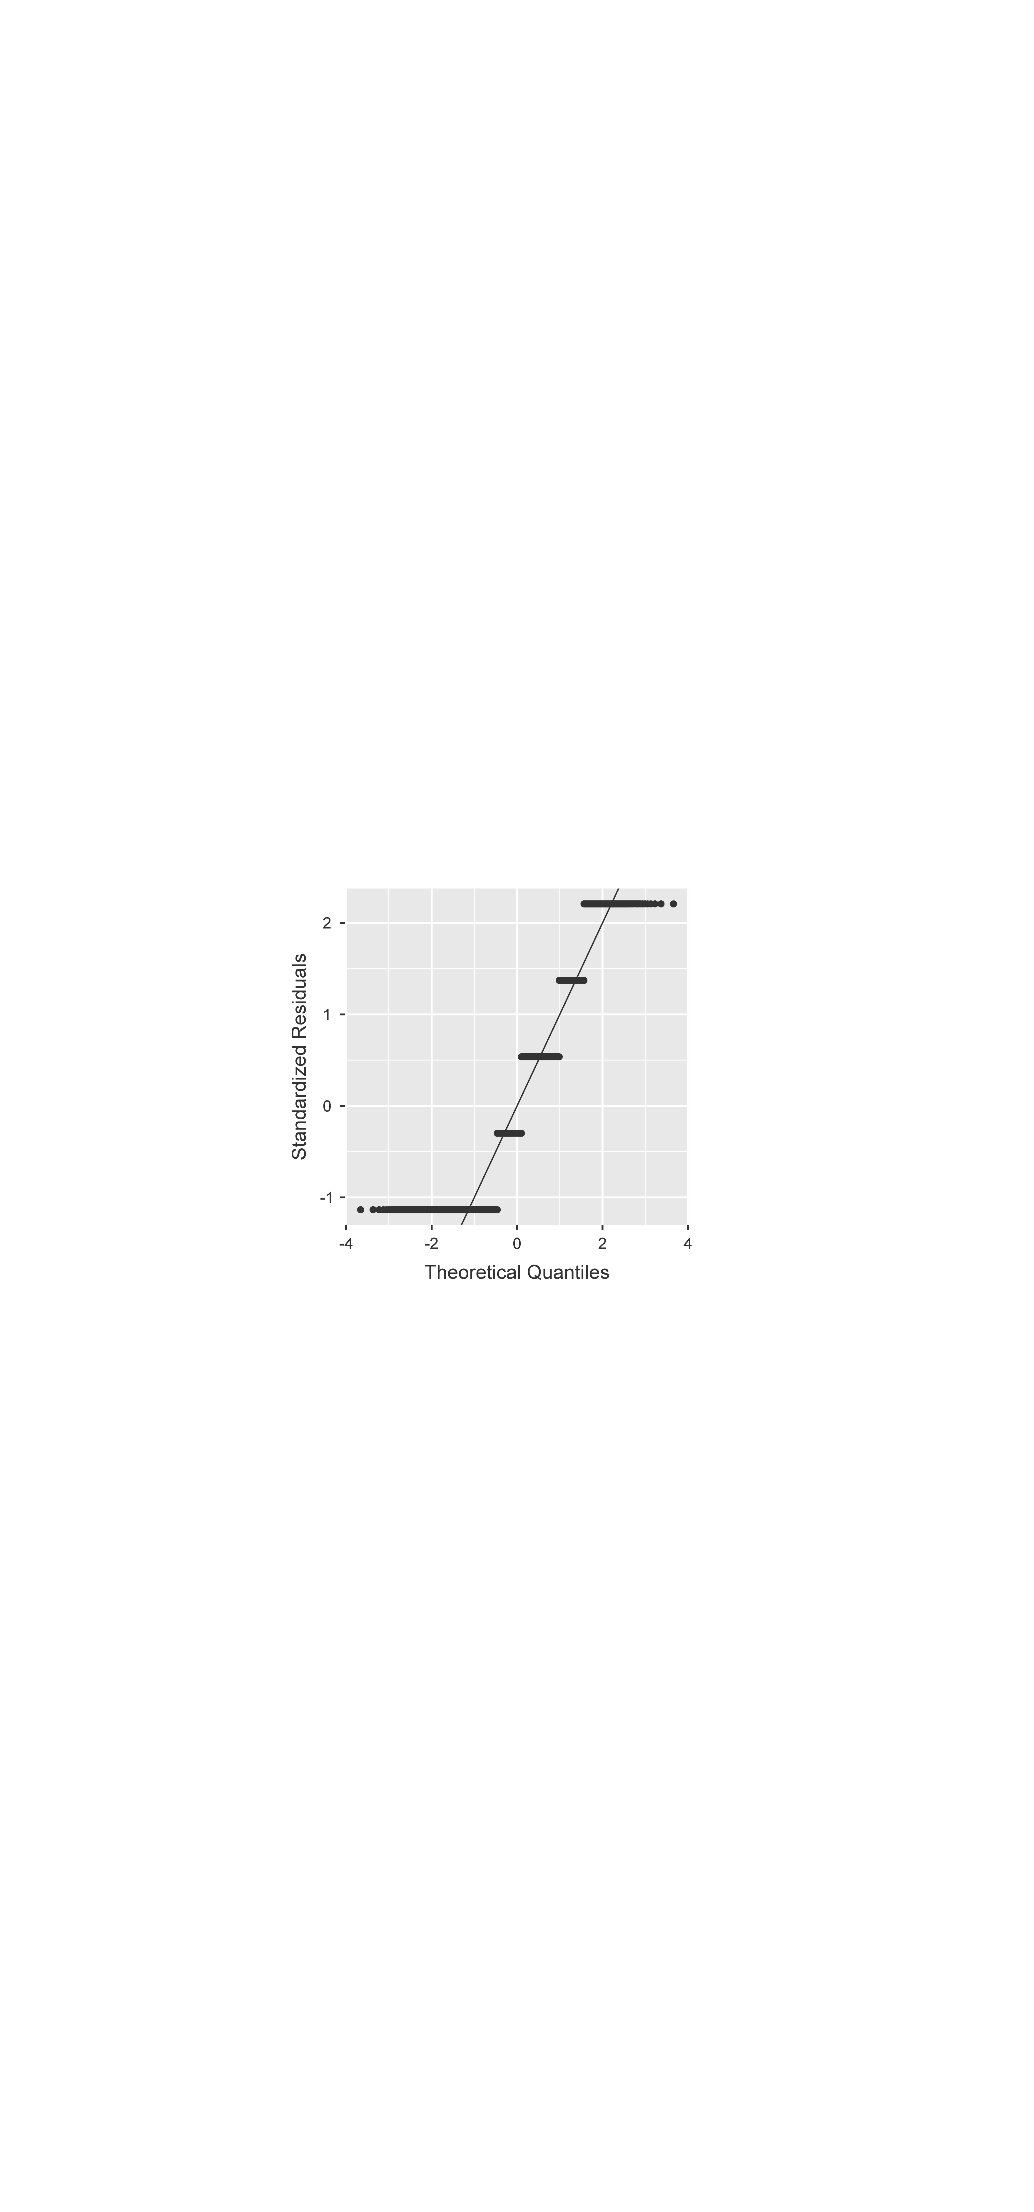
**

**Burnout_9**

**
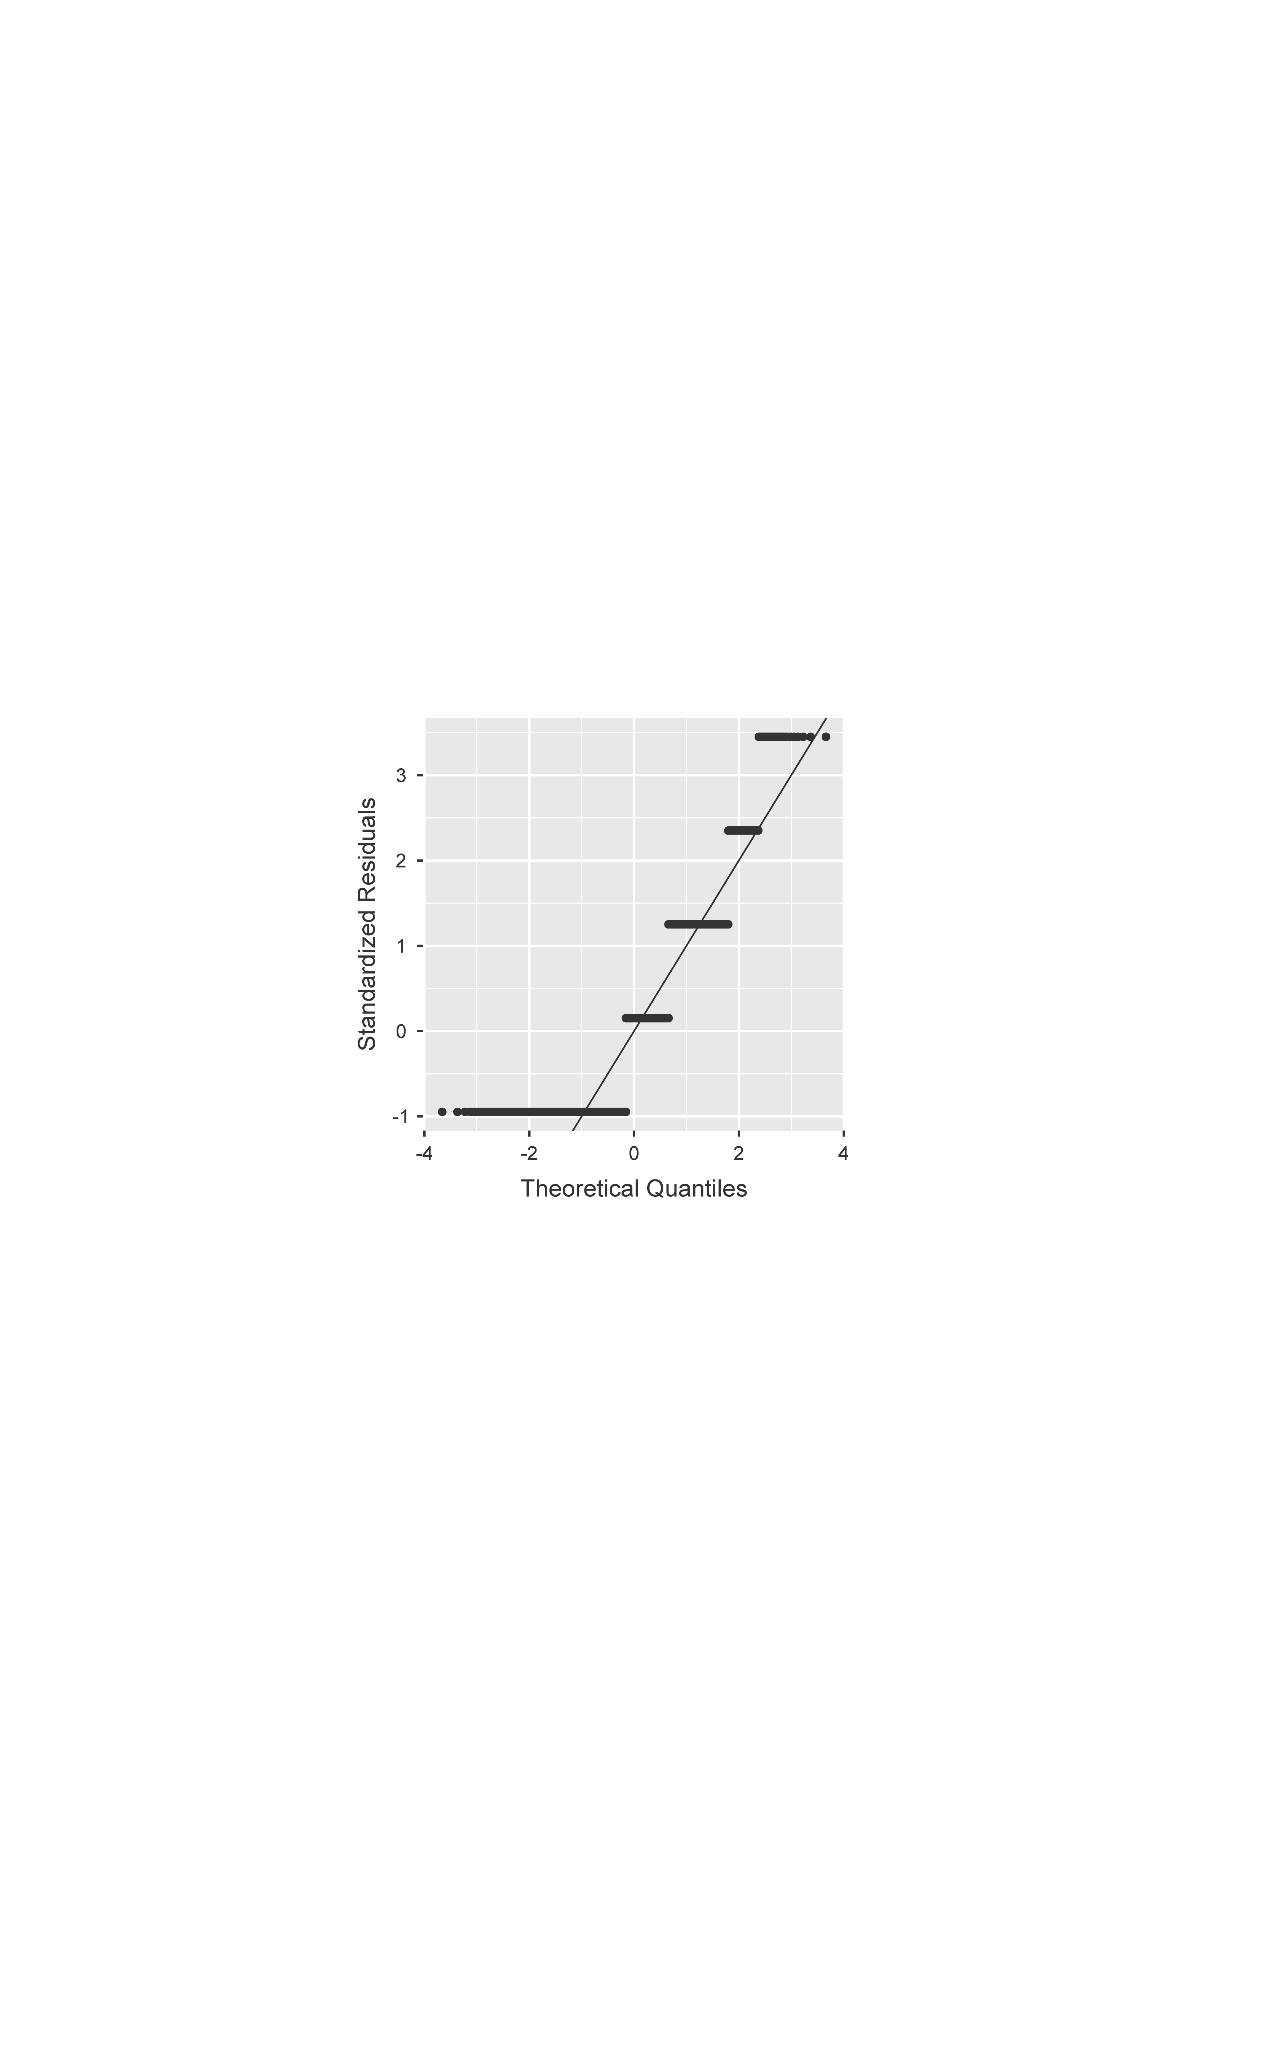
**

**Burnout_10**

**
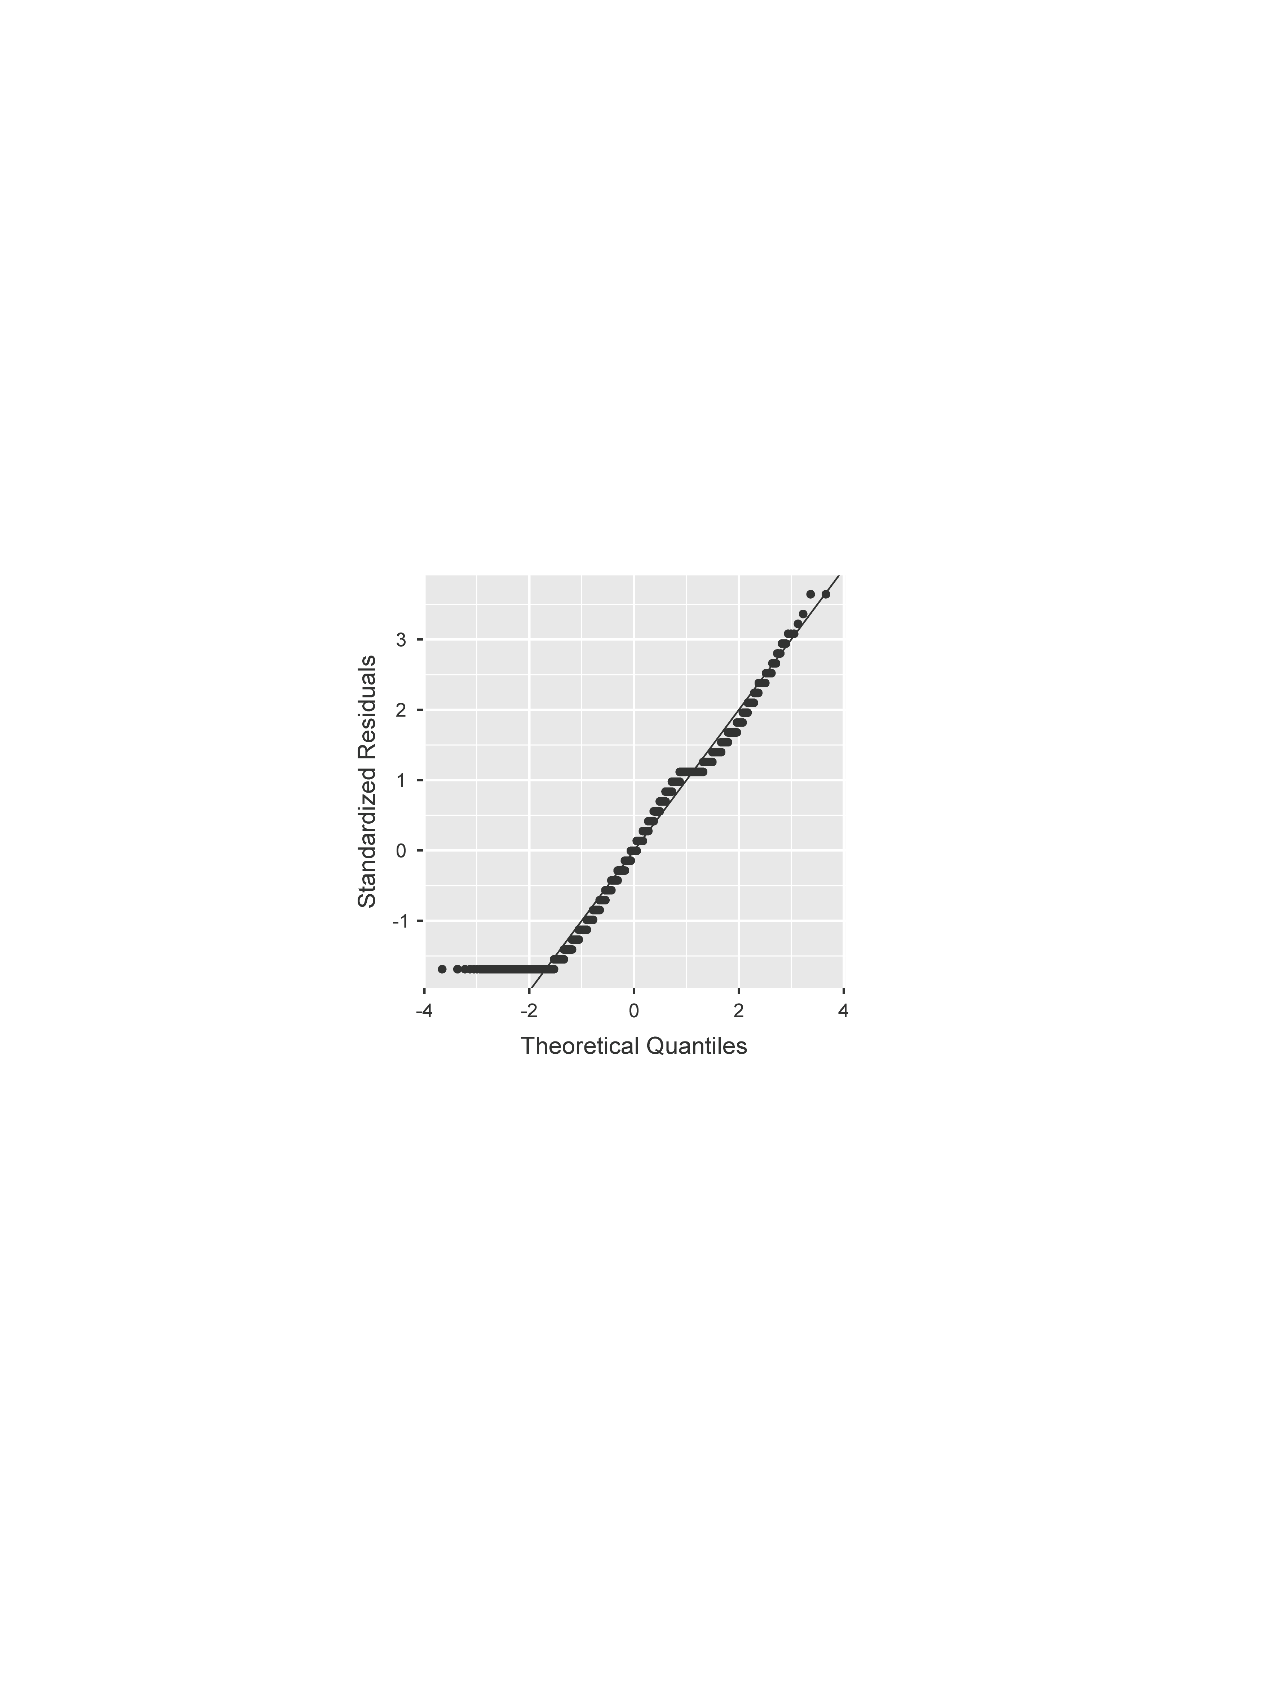
**

**Burnout_mean**

**
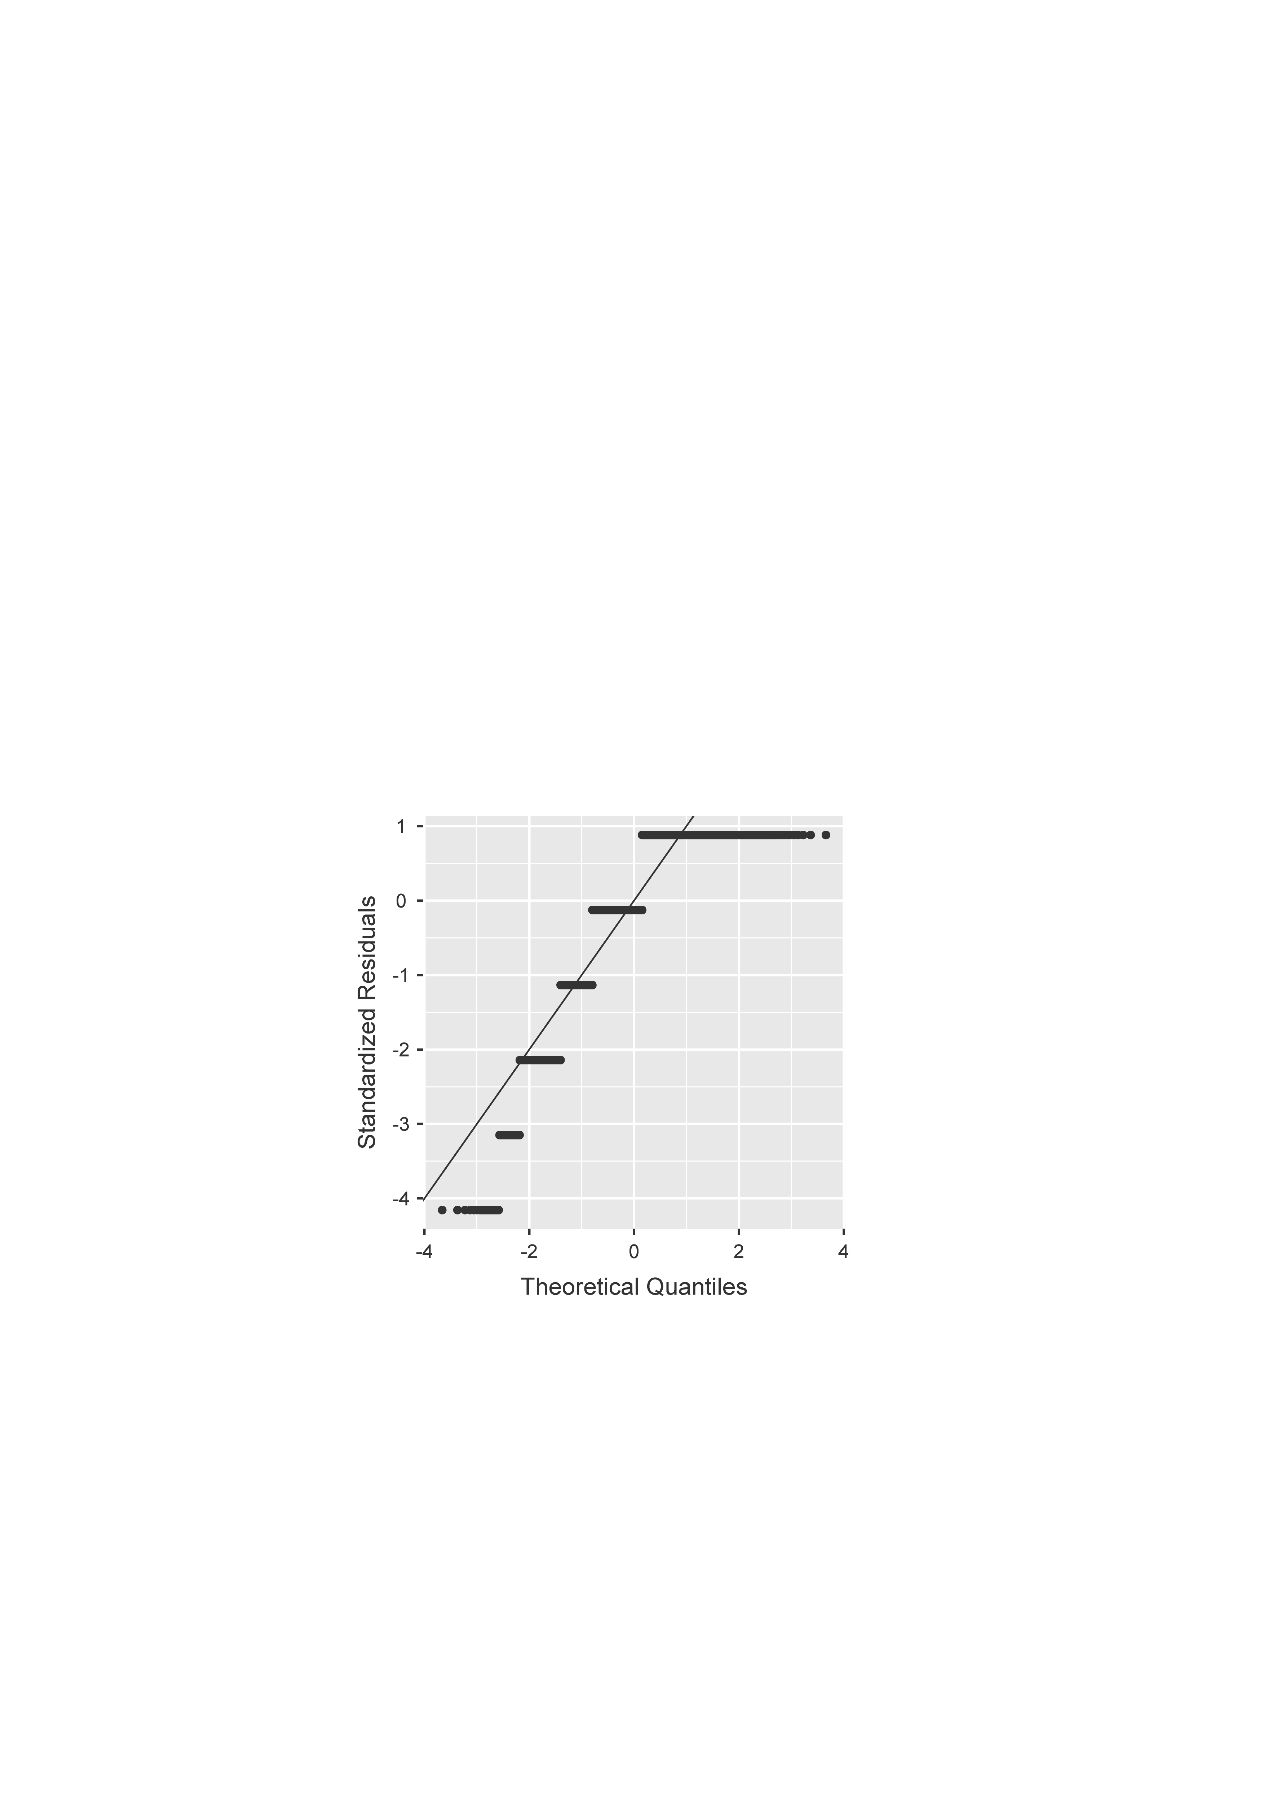
**

**PsyCap_1**

**
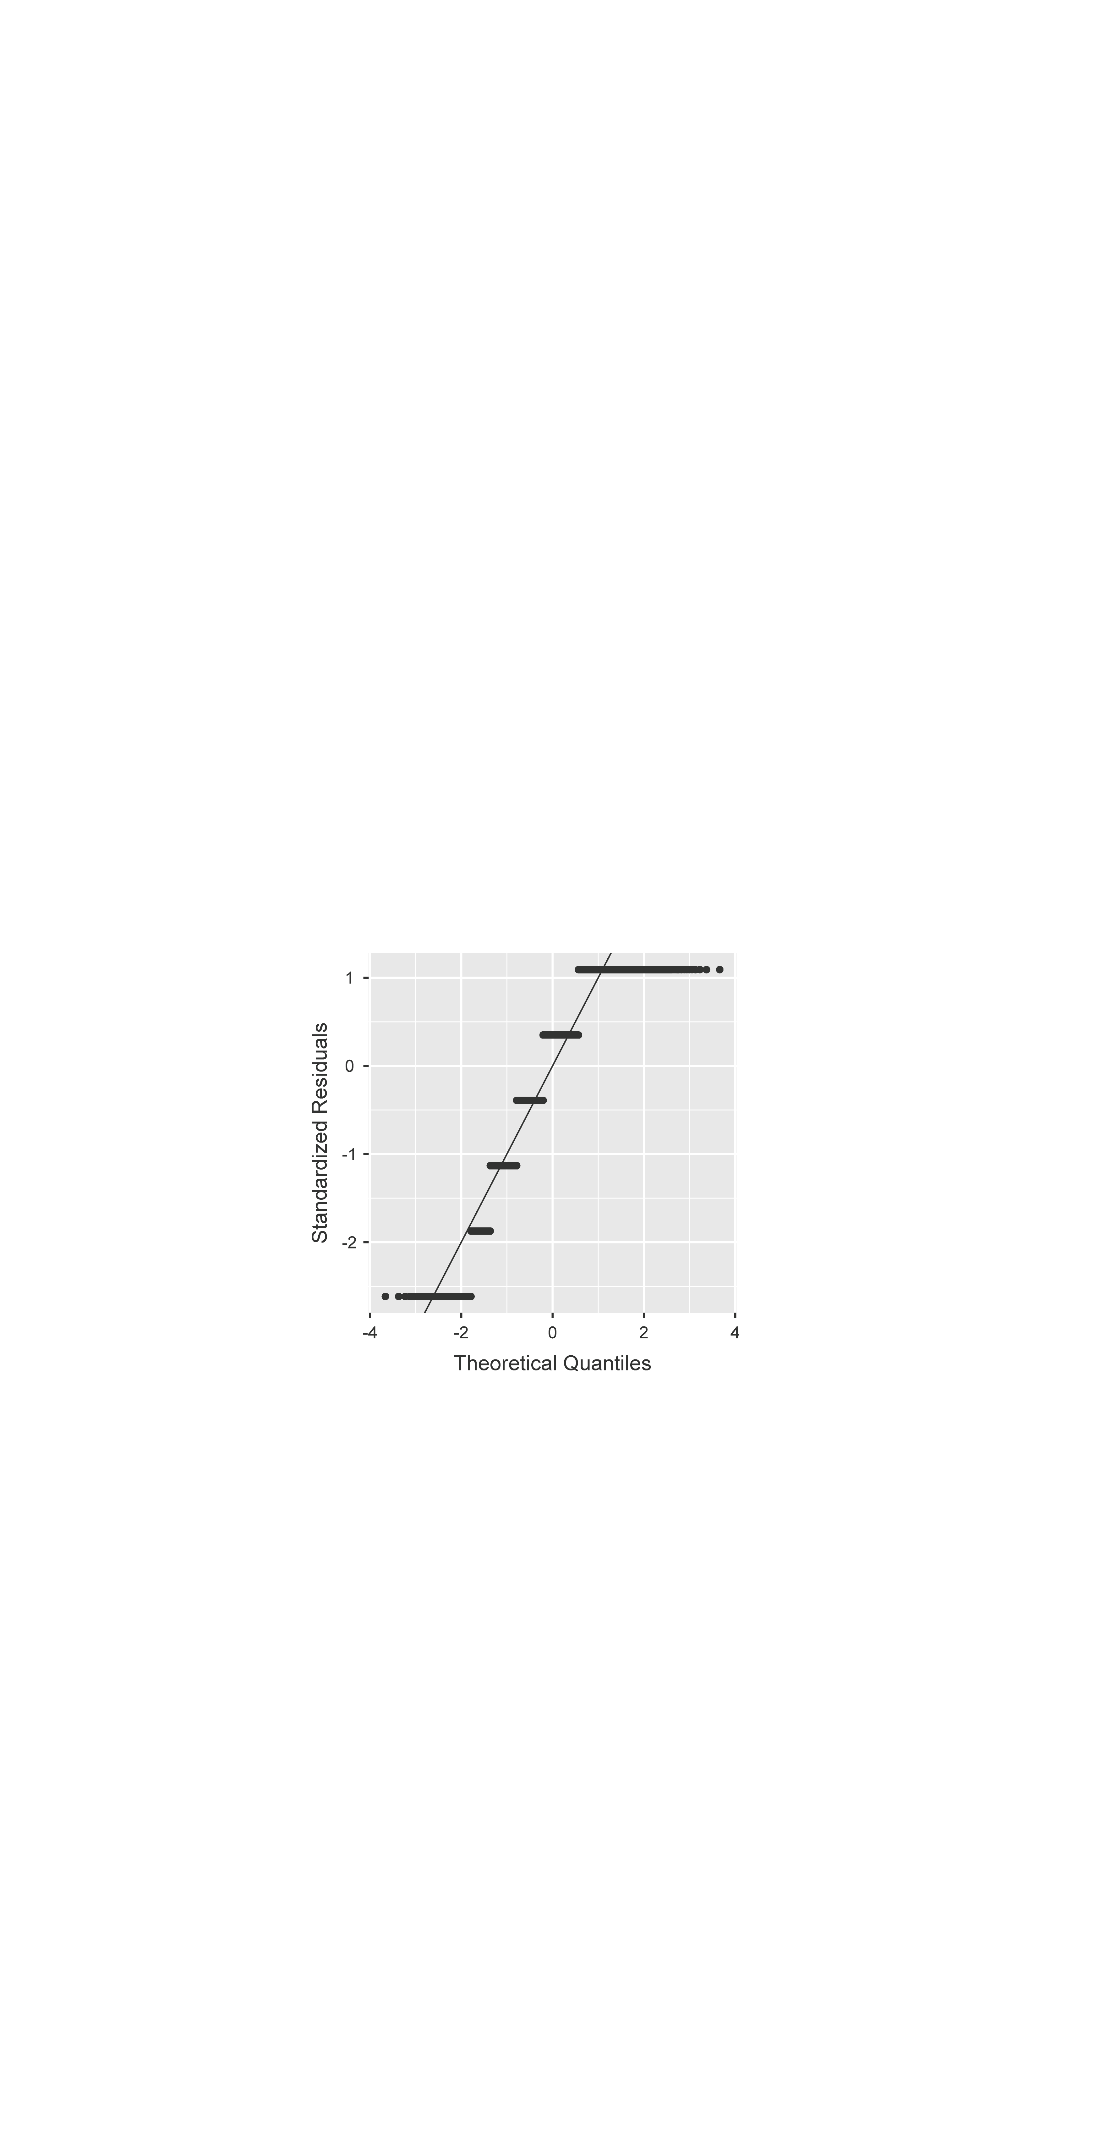
**

**PsyCap_2**

**
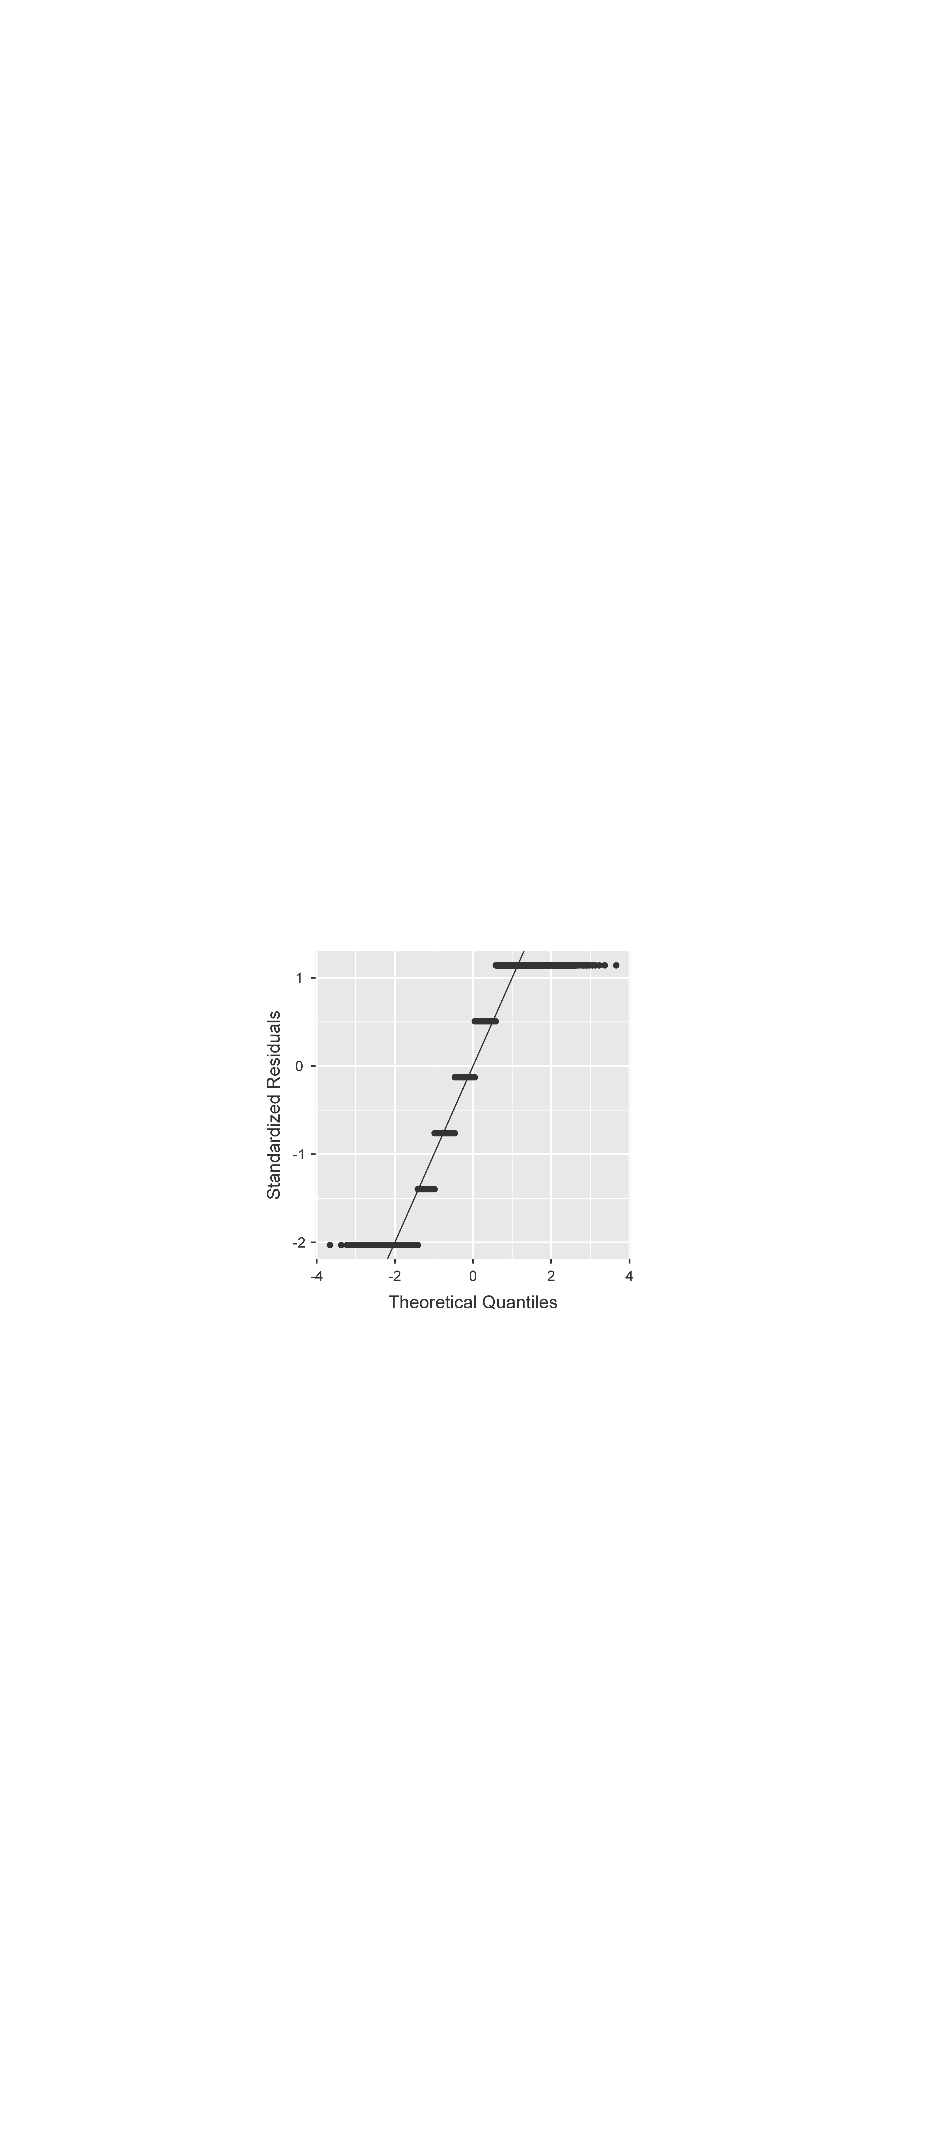
**

**PsyCap_3**

**
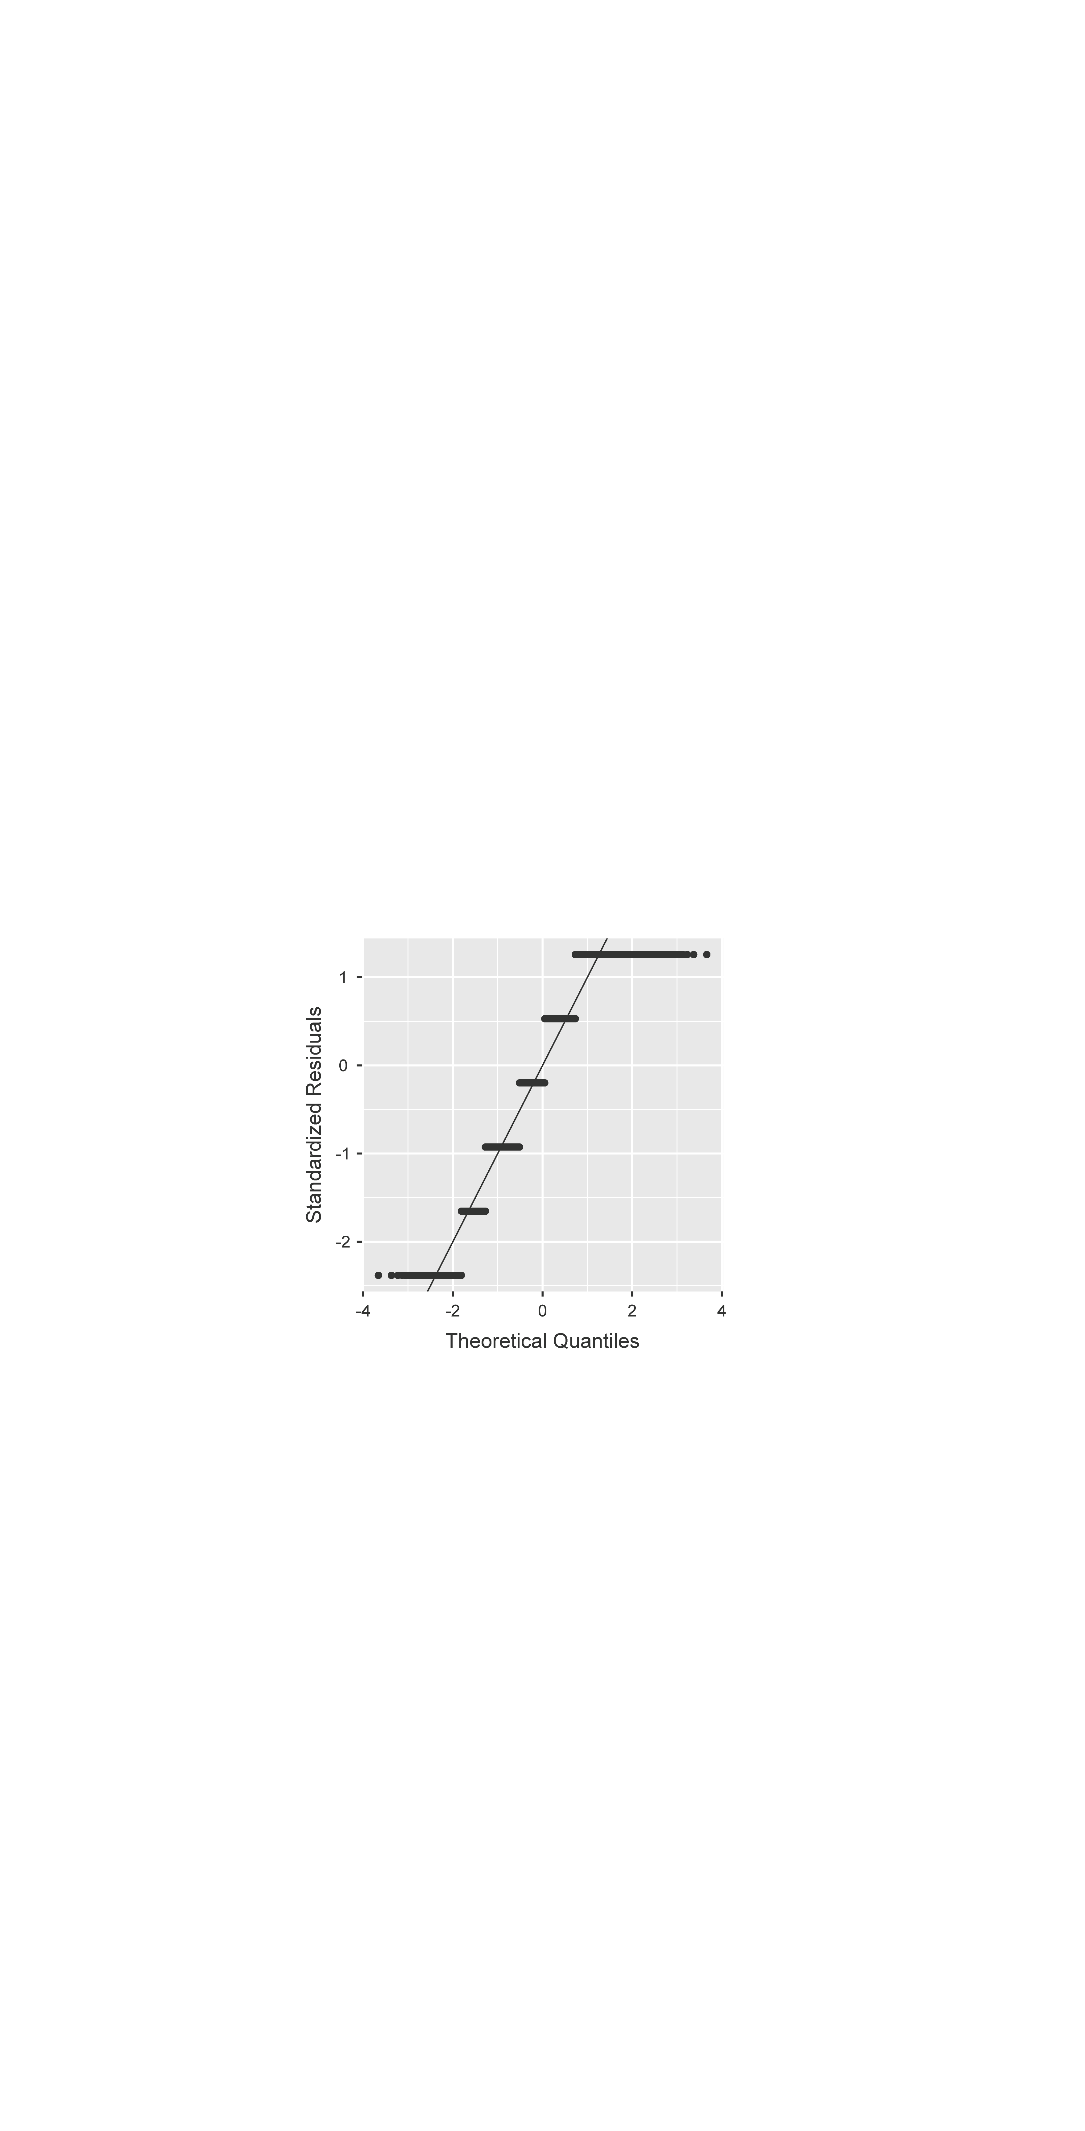
**

**PsyCap_4**

**
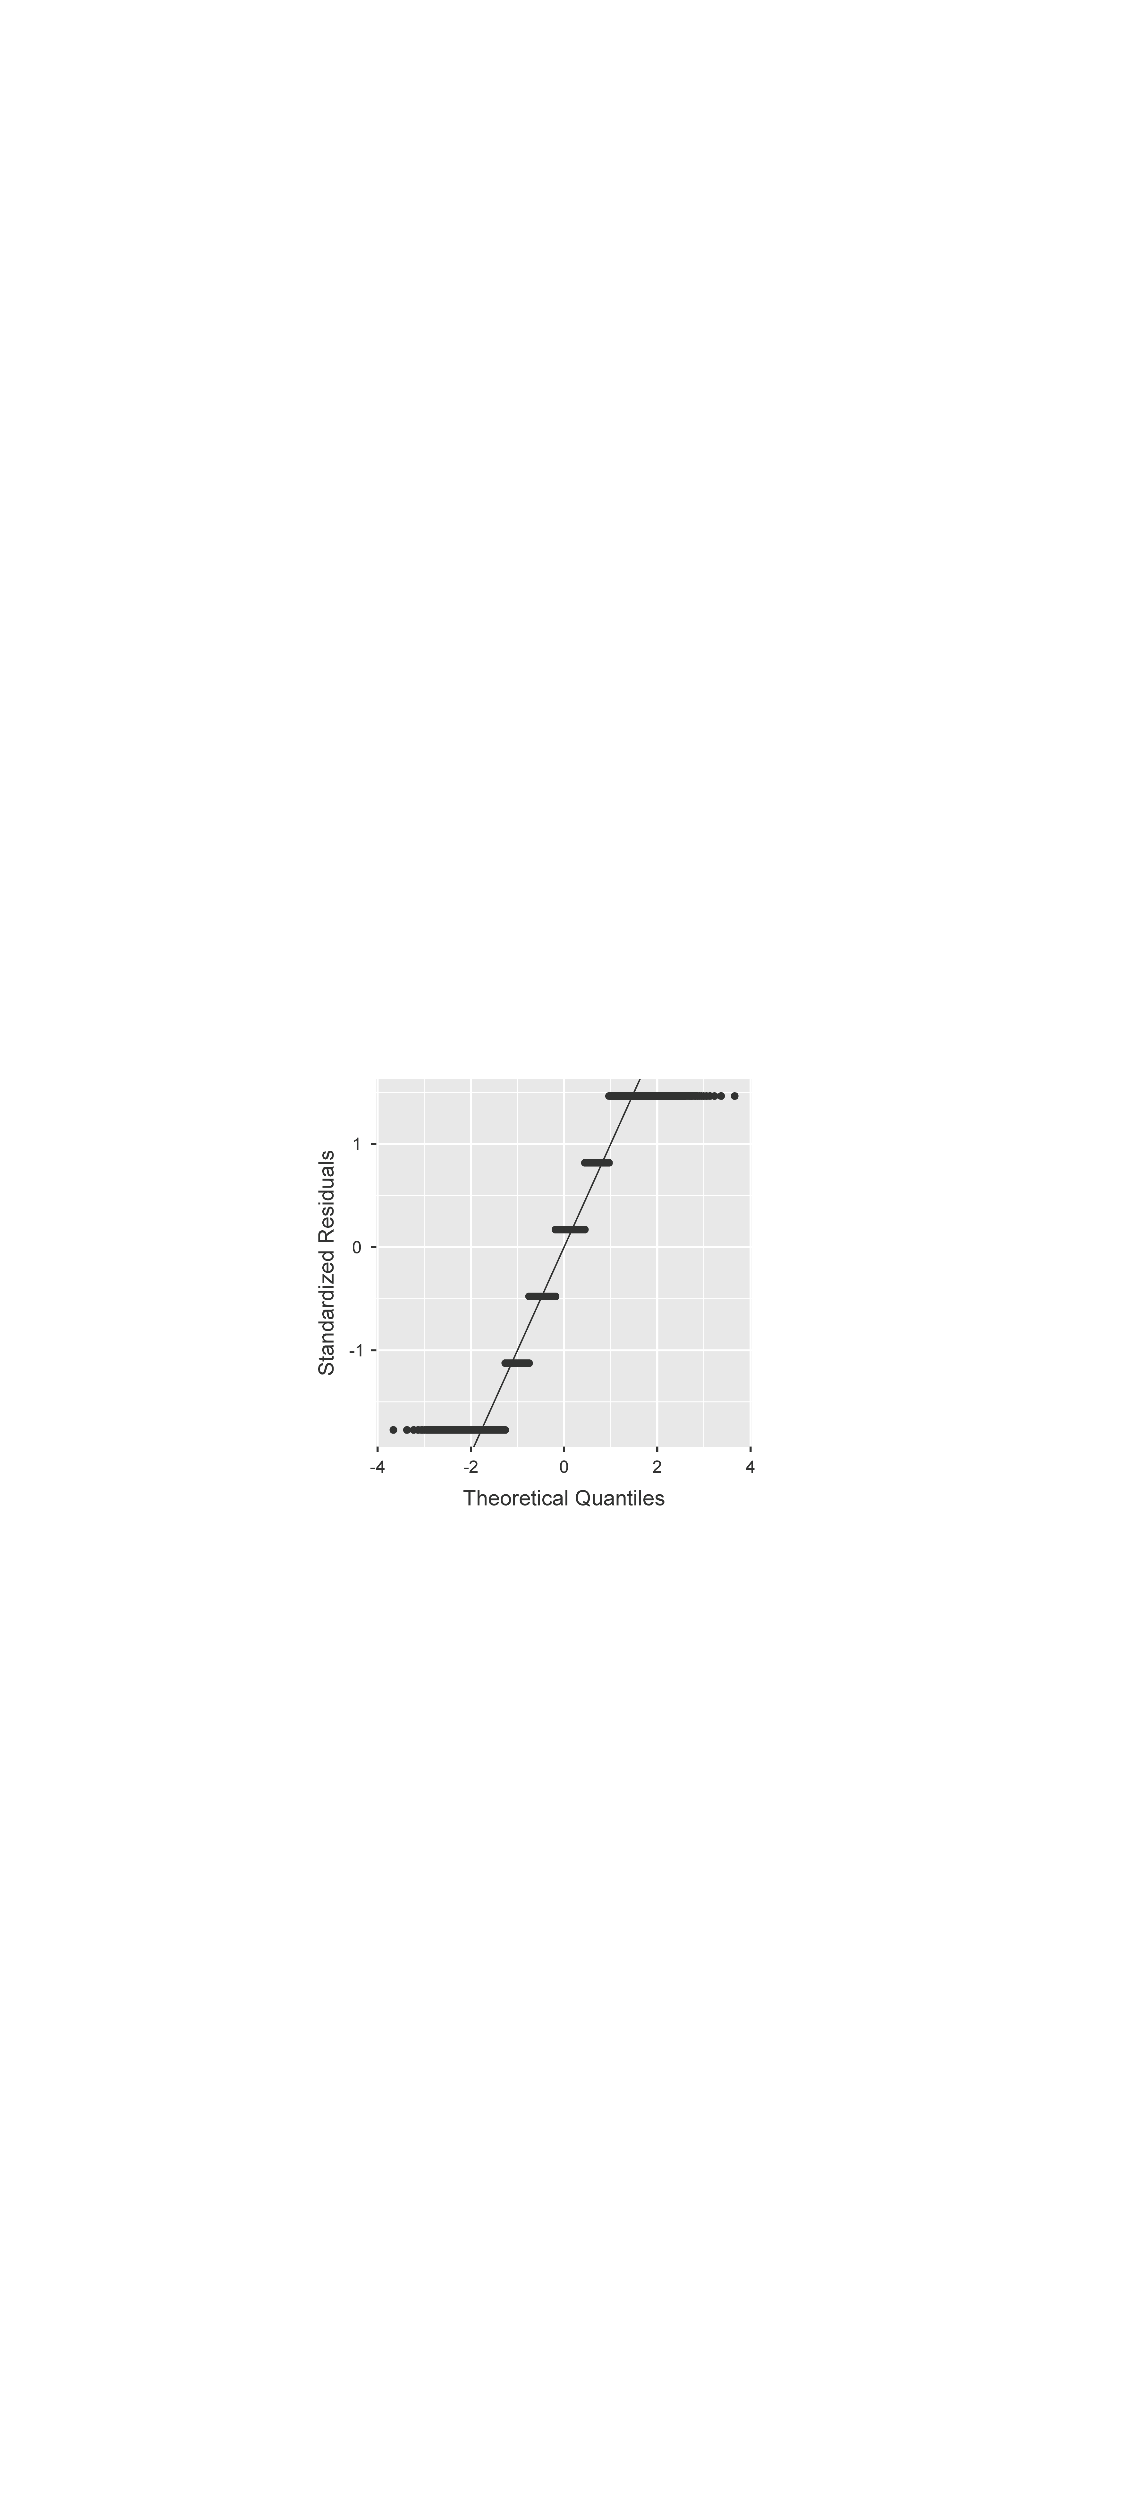
**

**PsyCap_5**

**
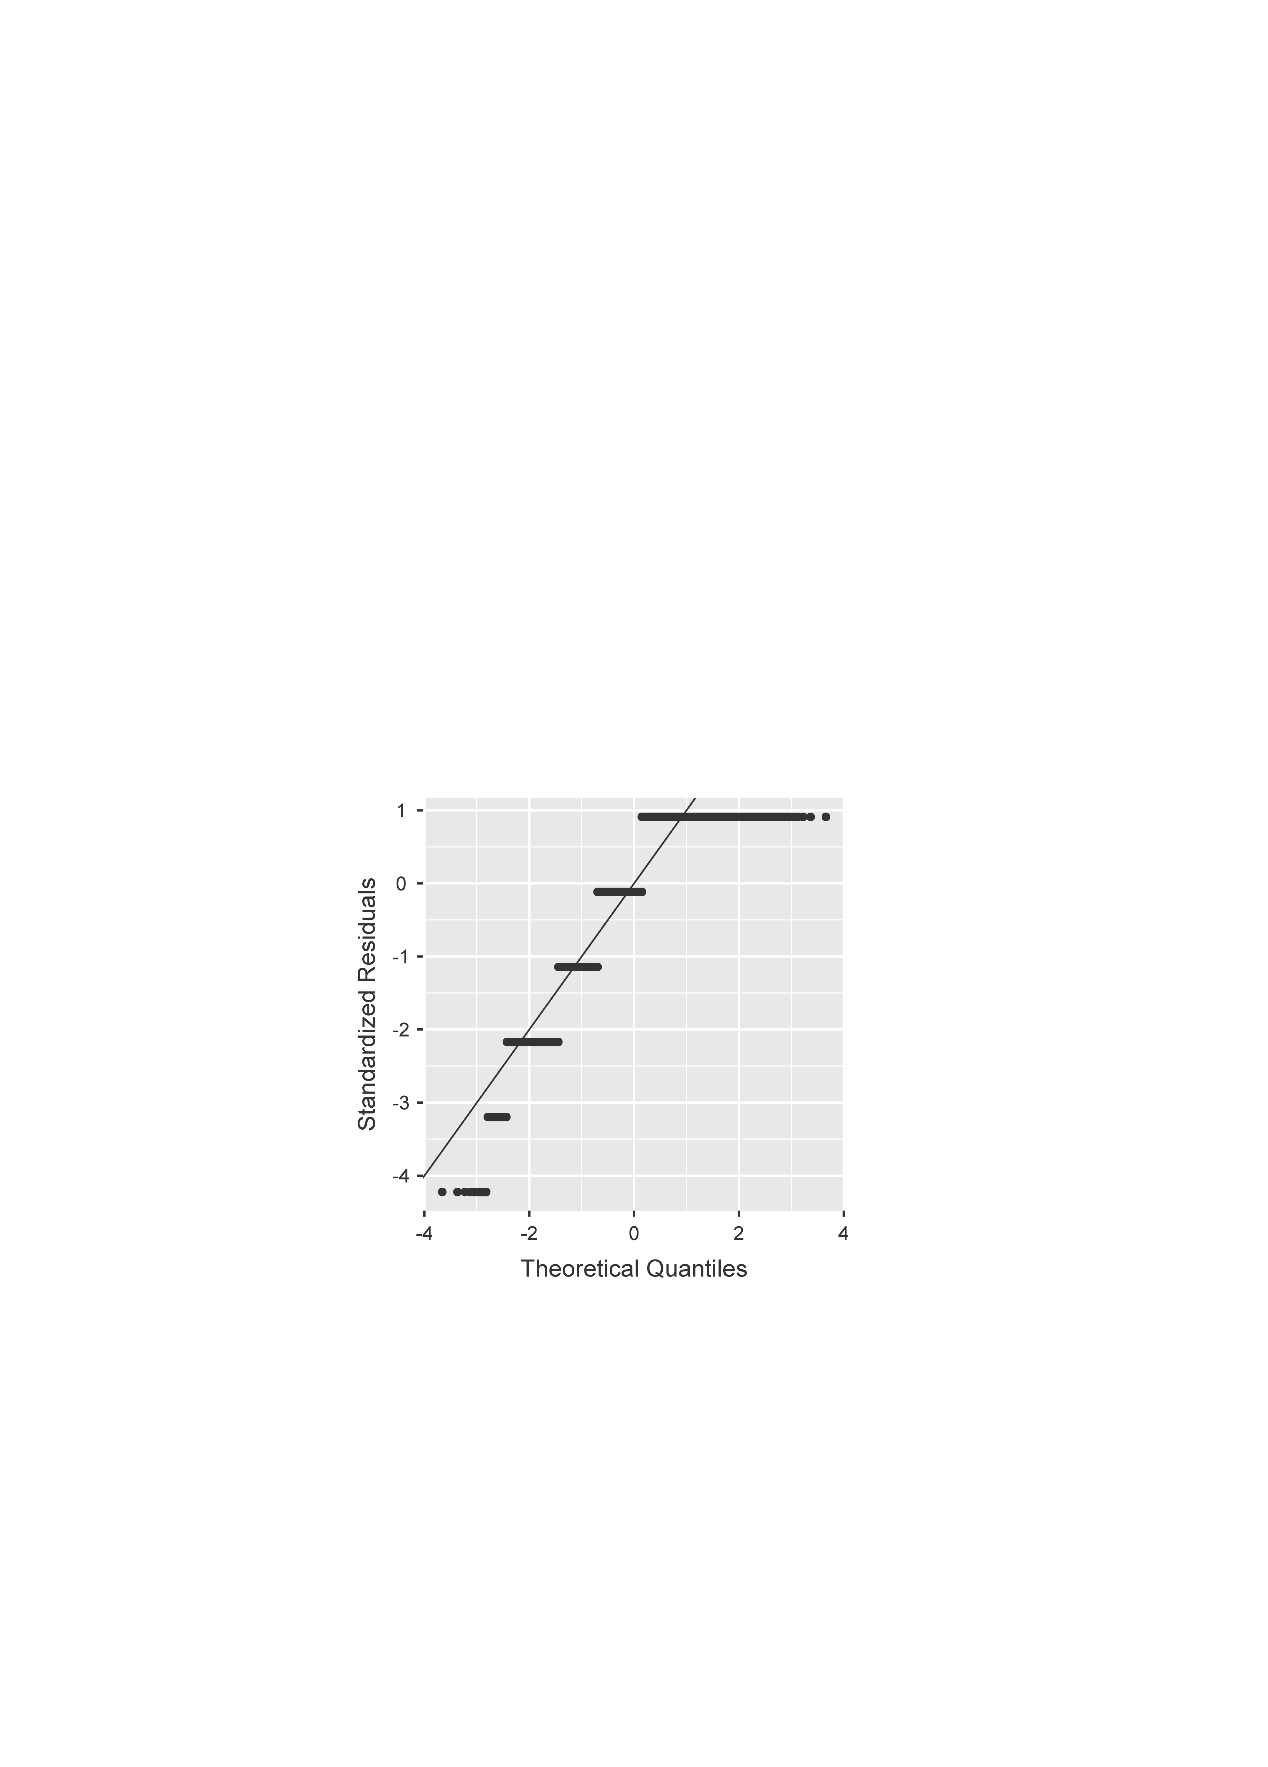
**

**PsyCap_6**

**
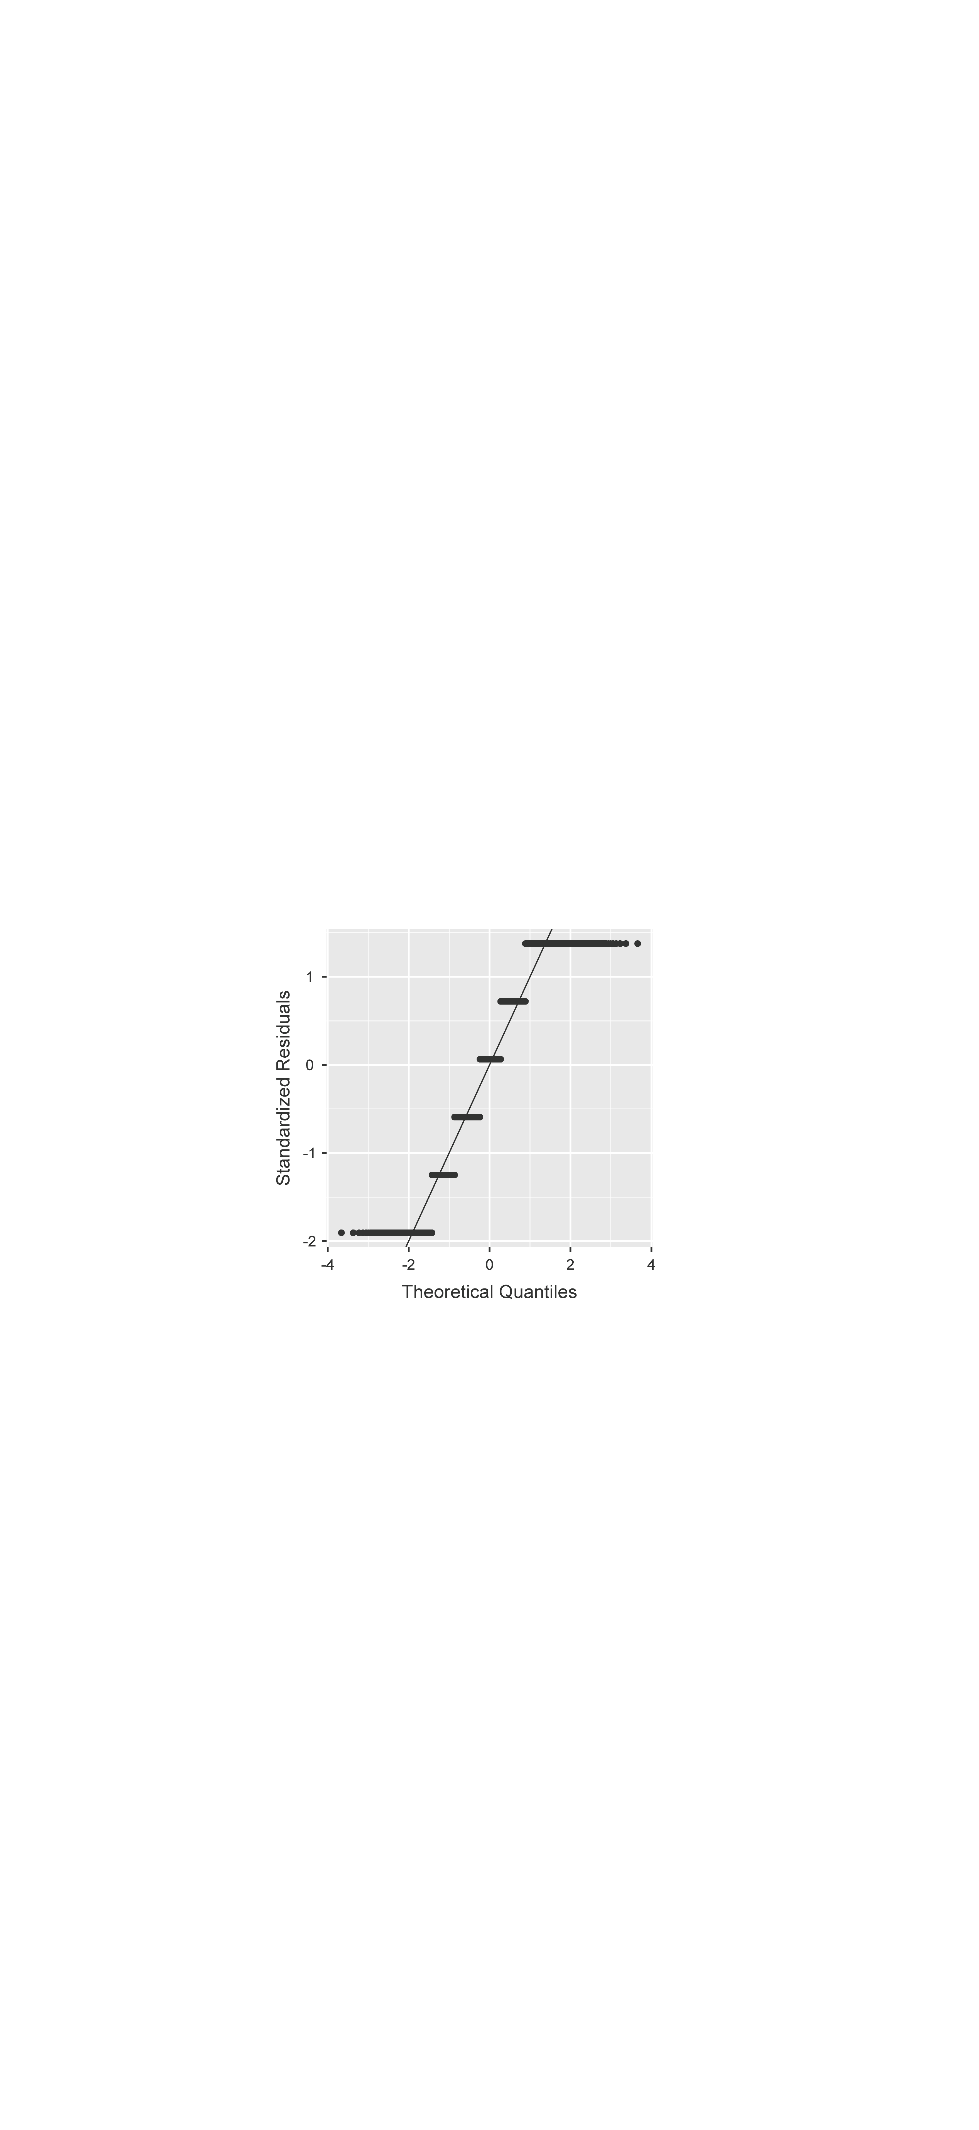
**

**PsyCap_7**

**
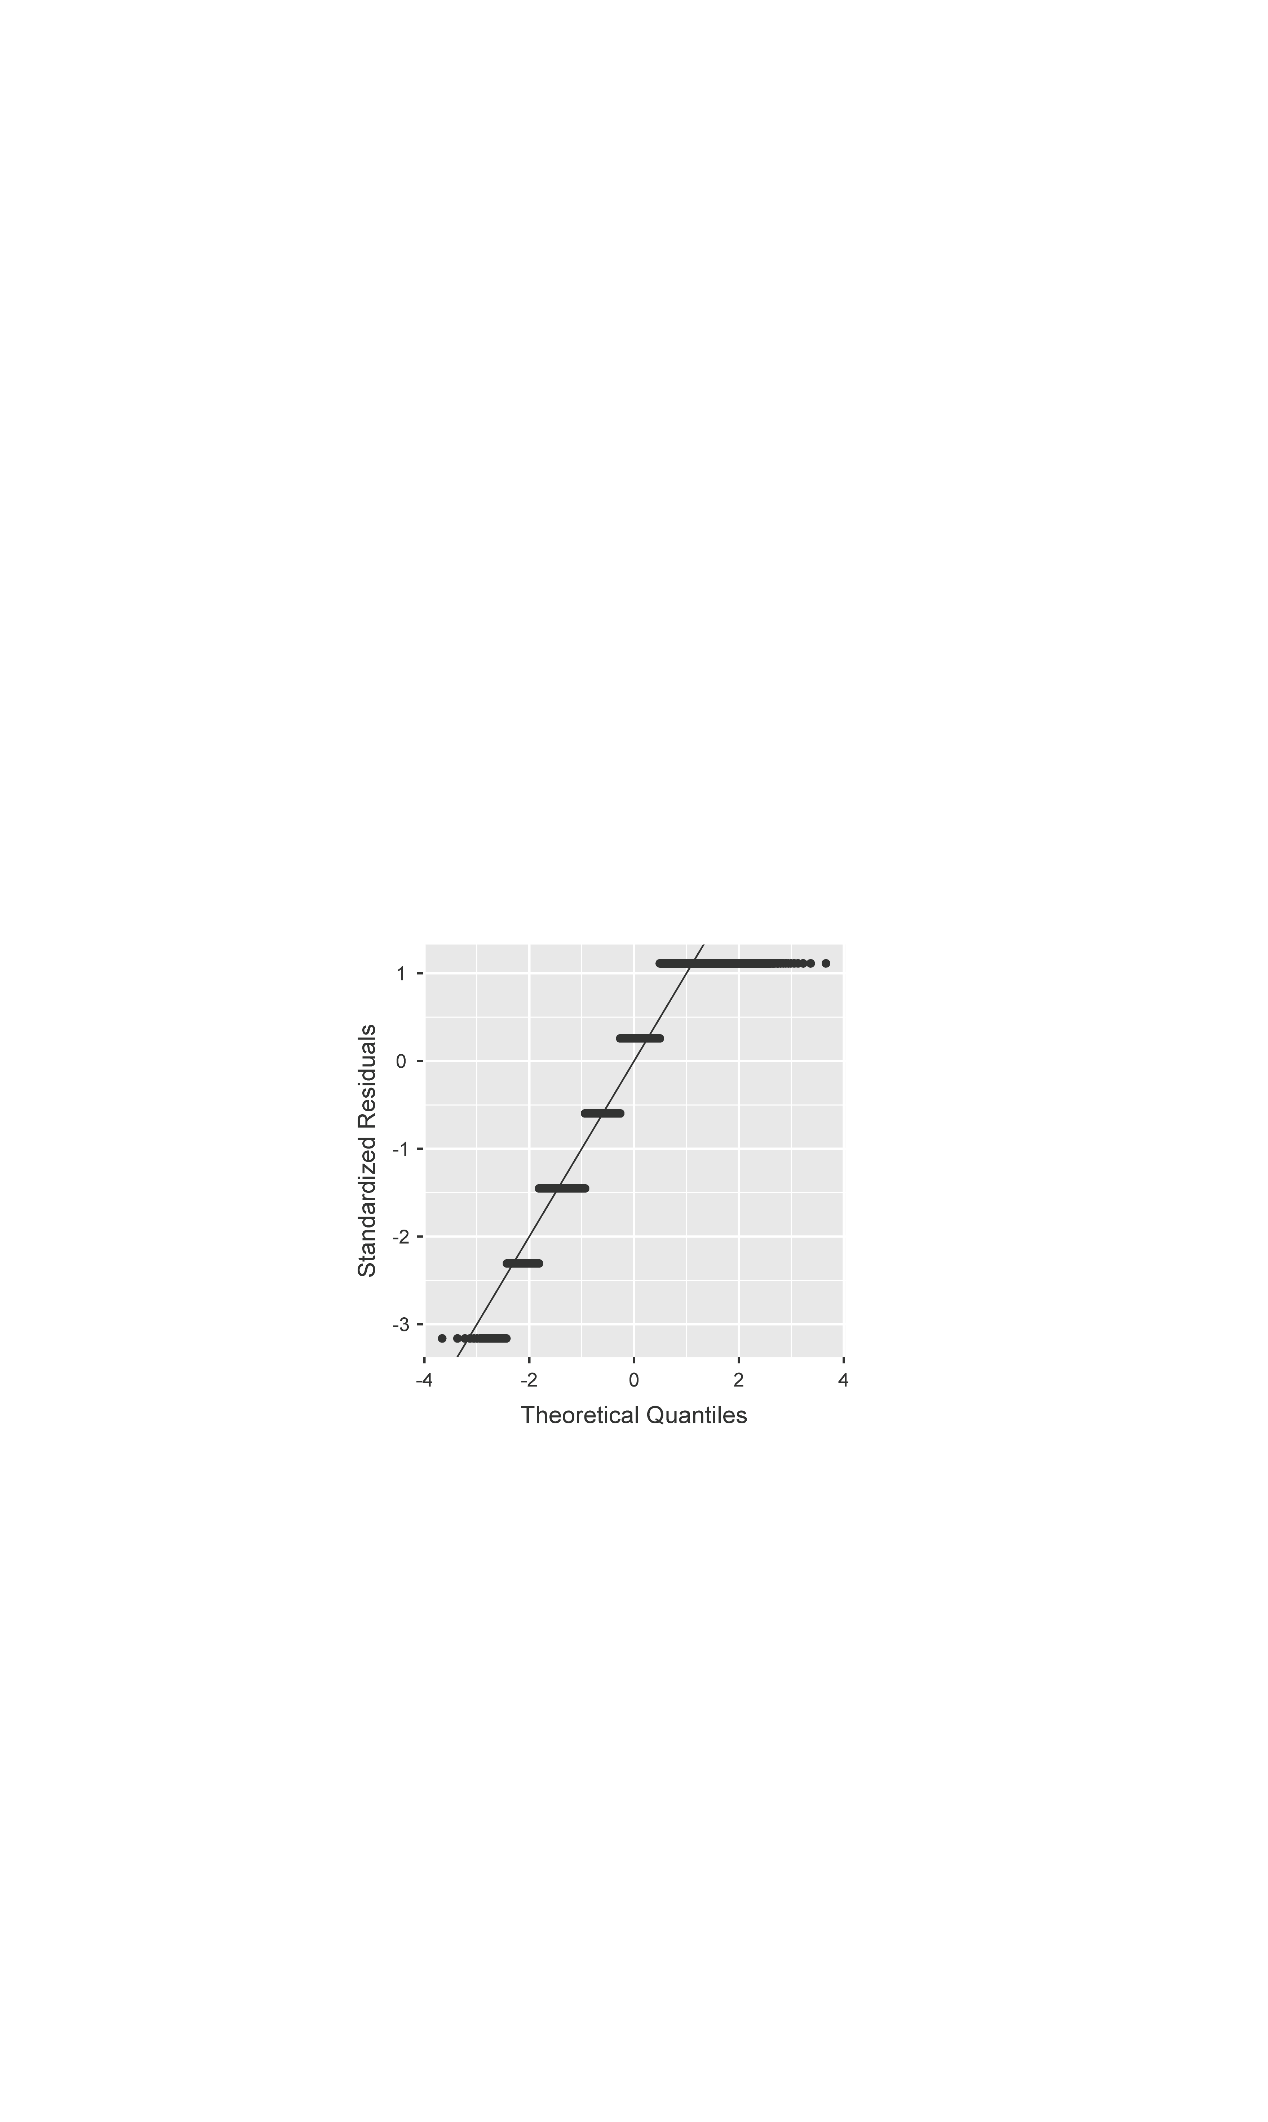
**

**PsyCap_8**

**
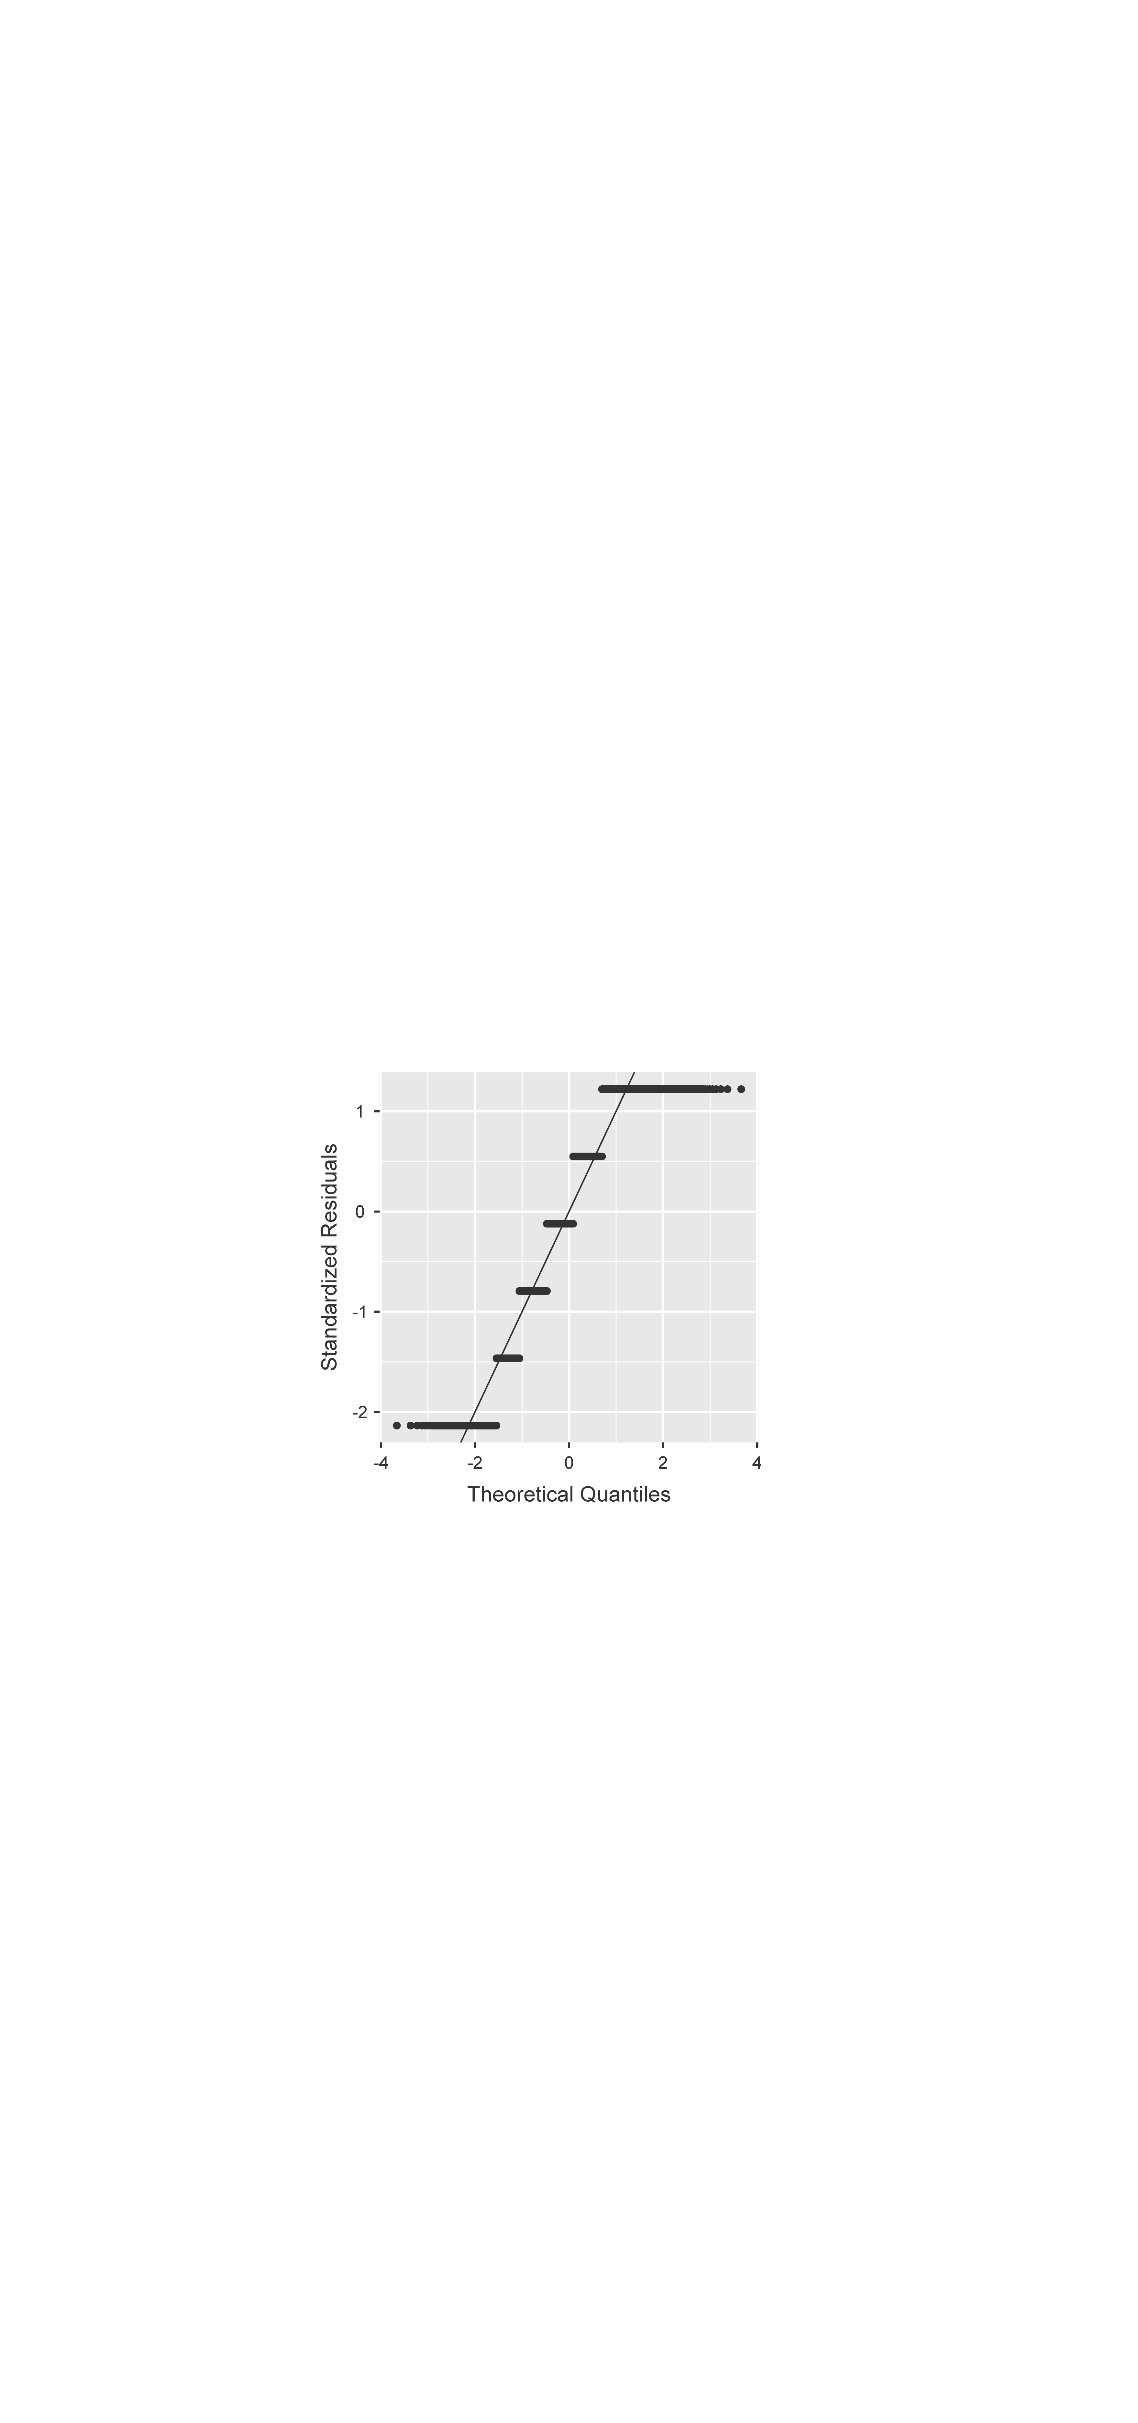
**

**PsyCap_9**

**
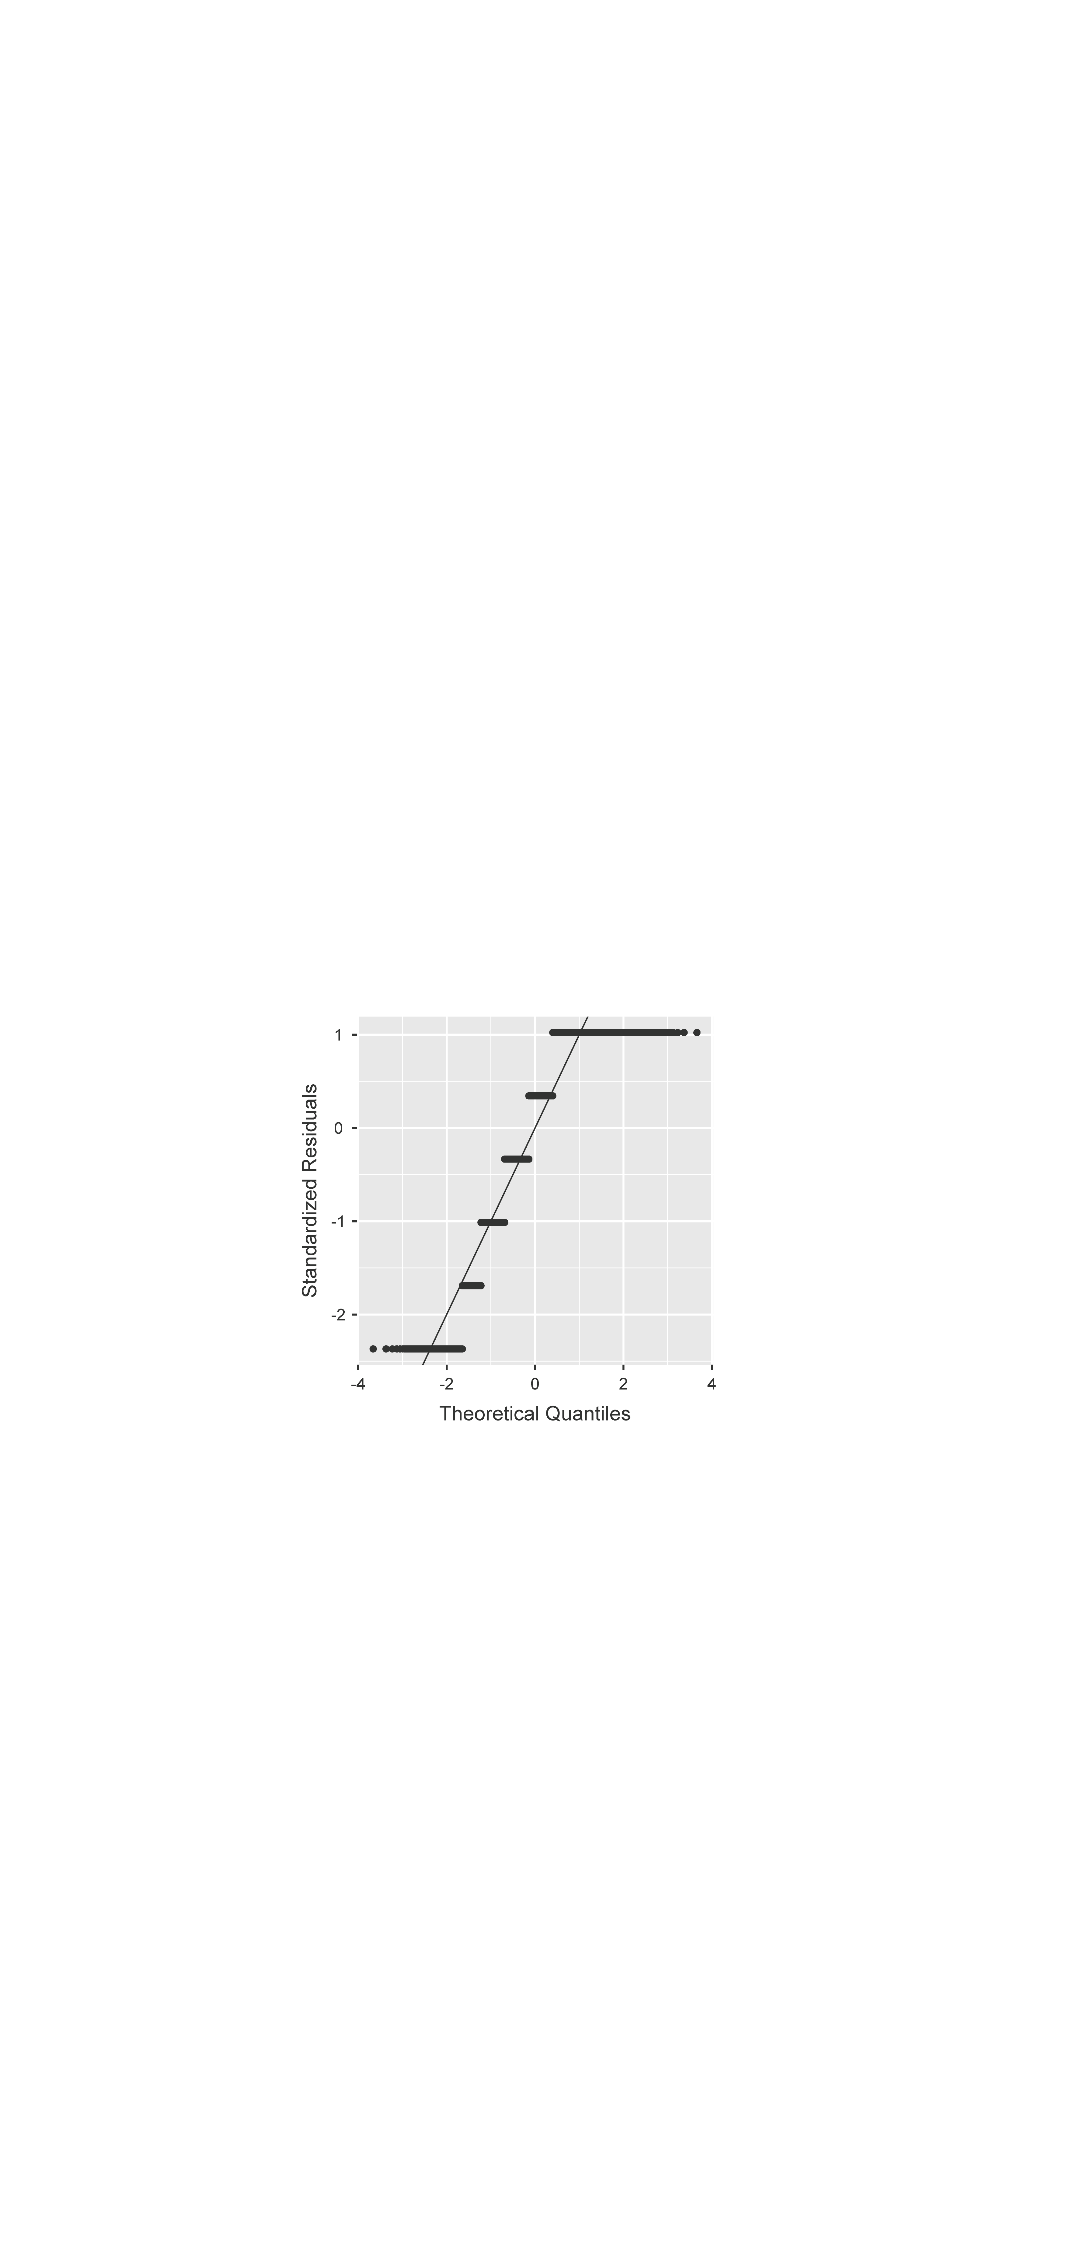
**

**PsyCap_10**

**
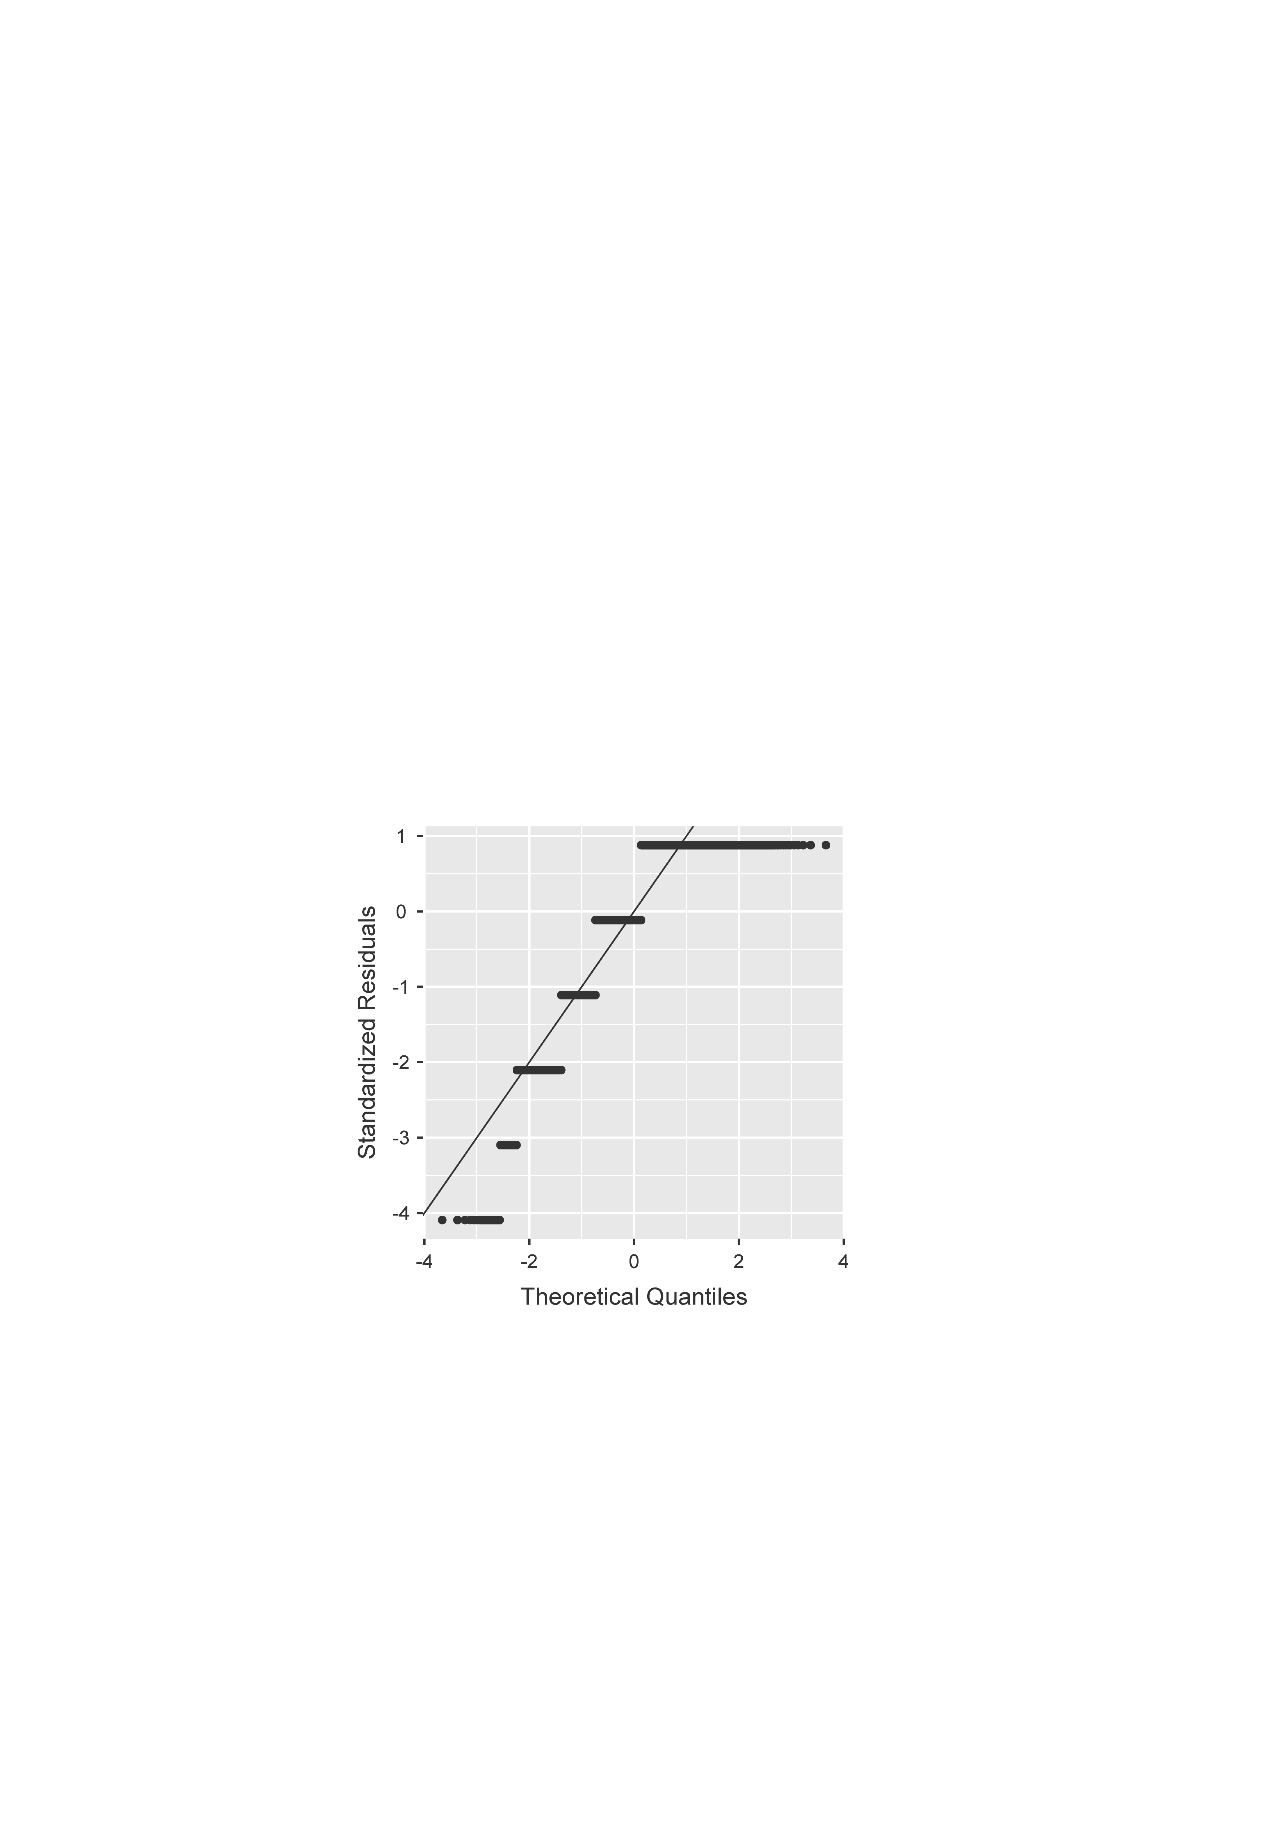
**

**PsyCap_11**

**
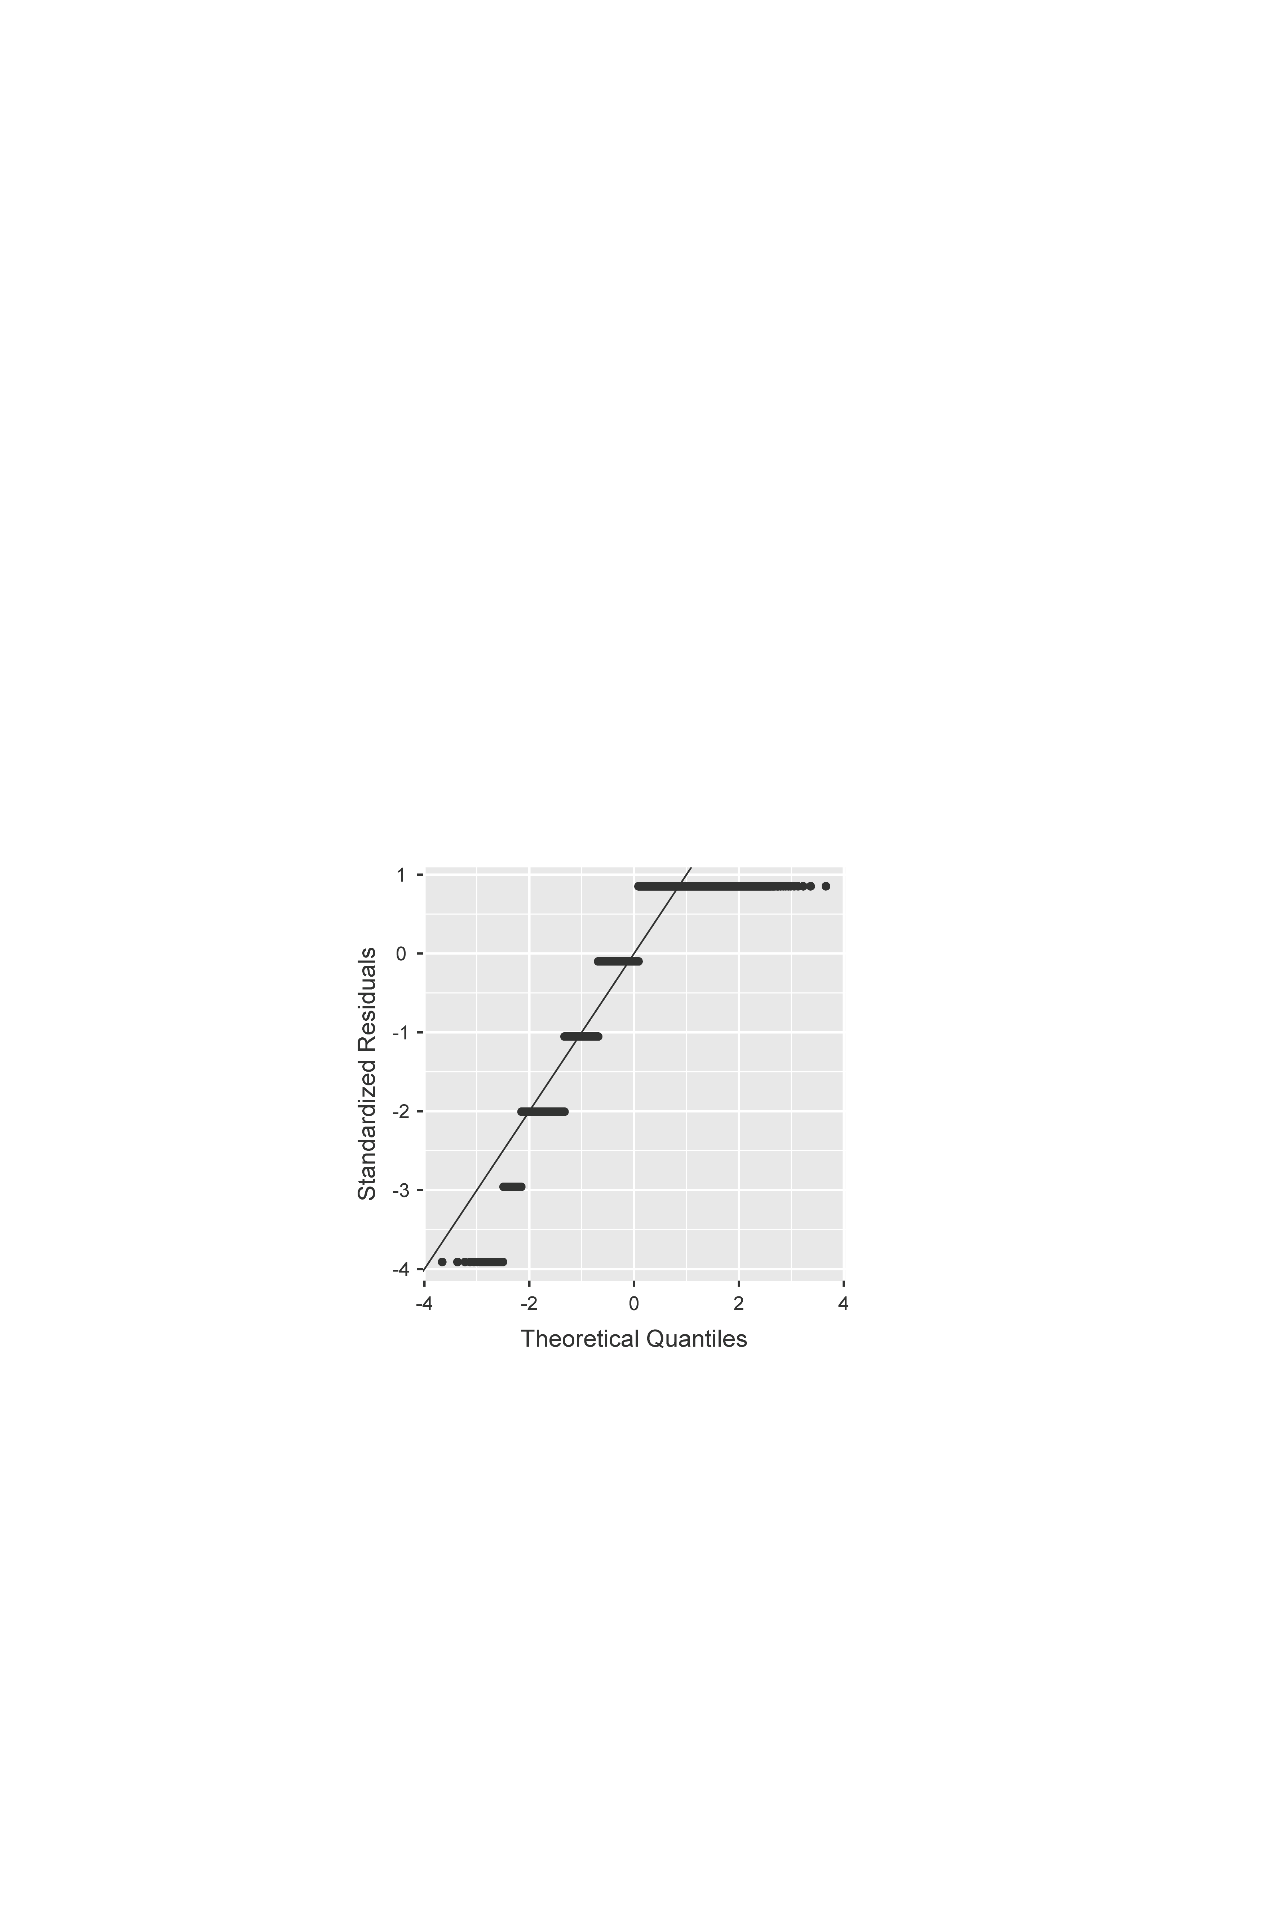
**

**PsyCap_12**

**
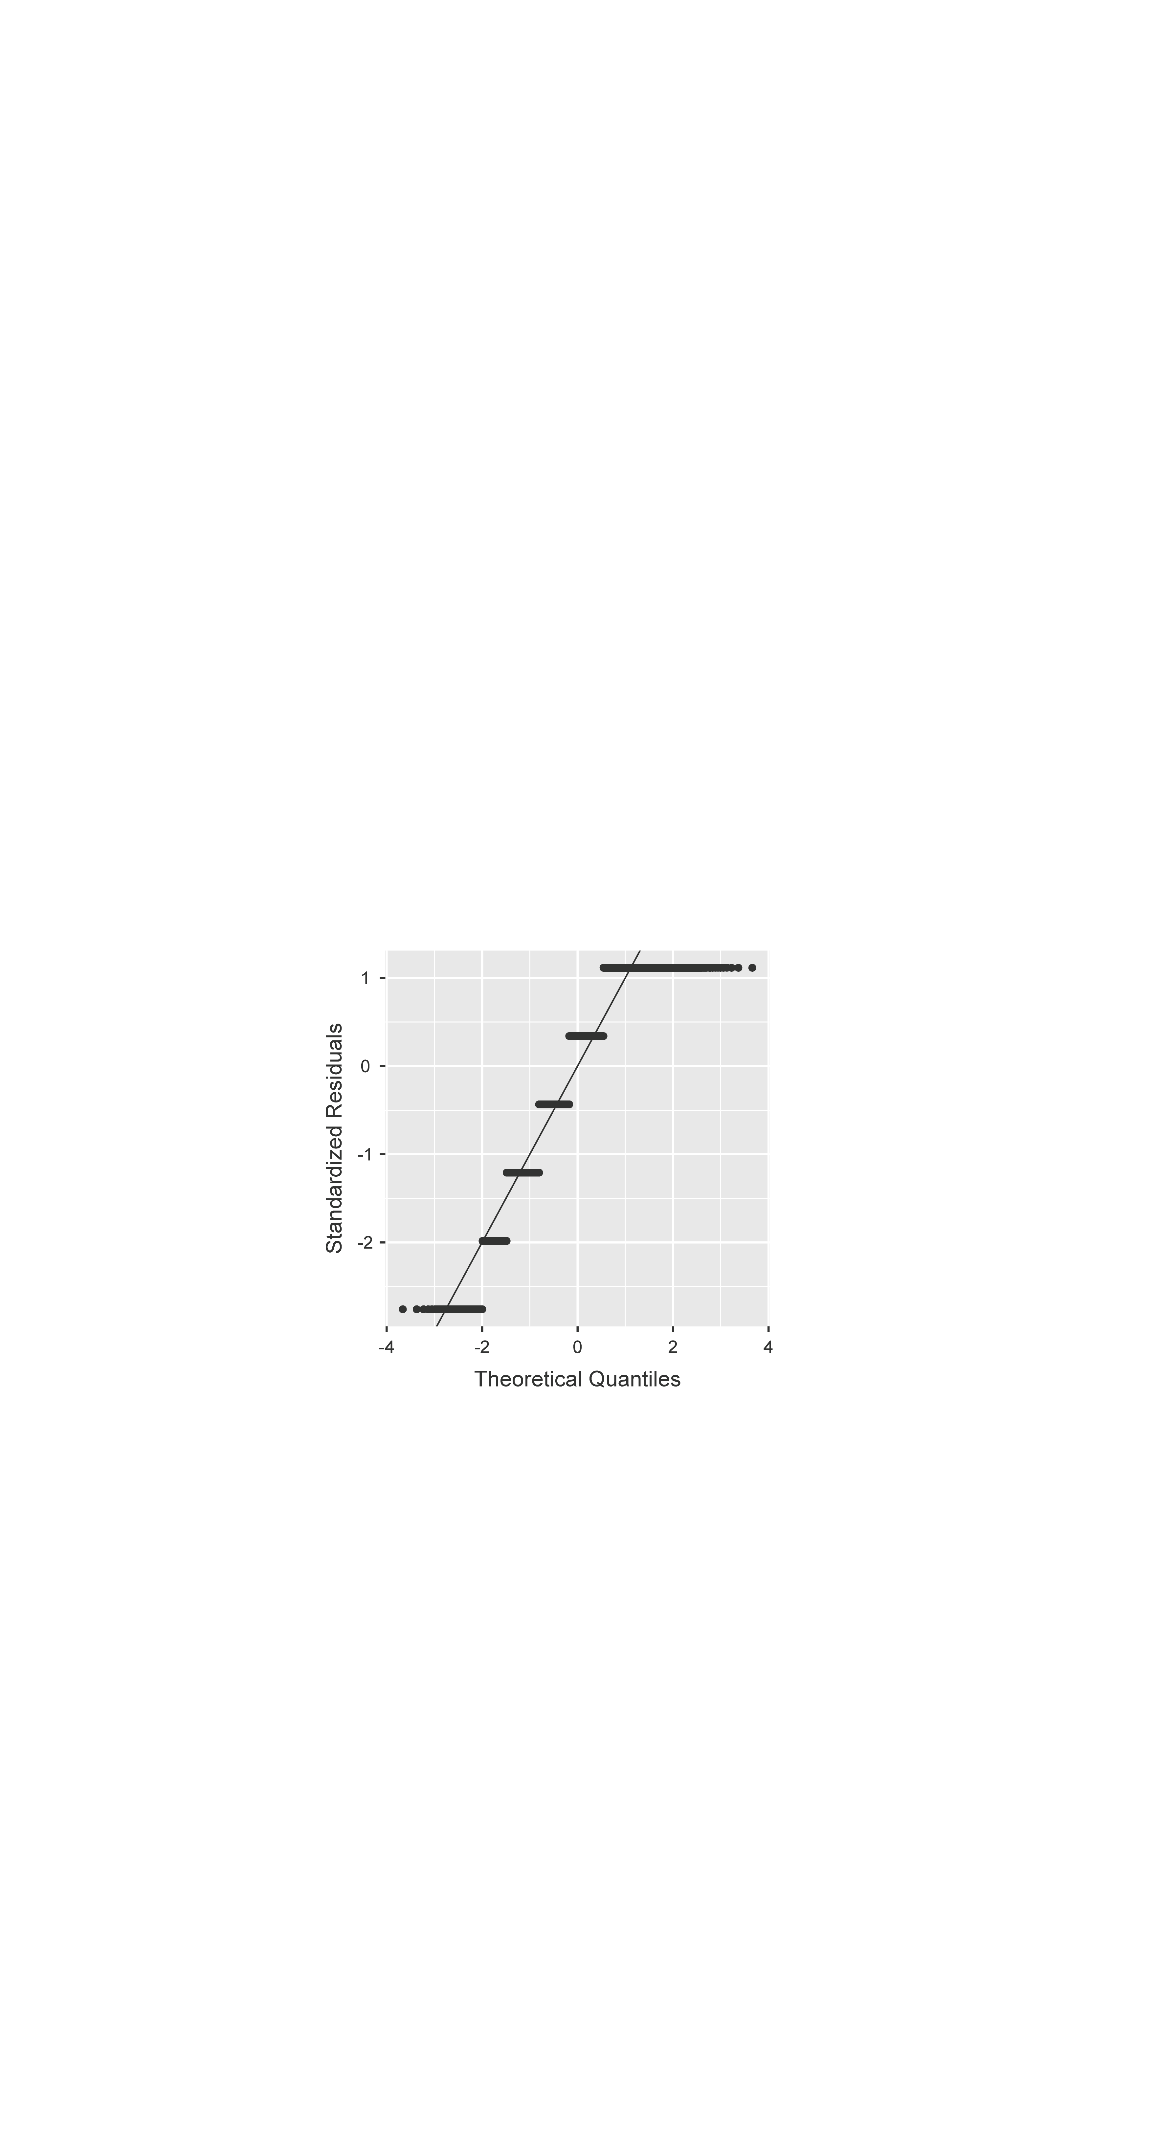
**

**PsyCap_13**

**
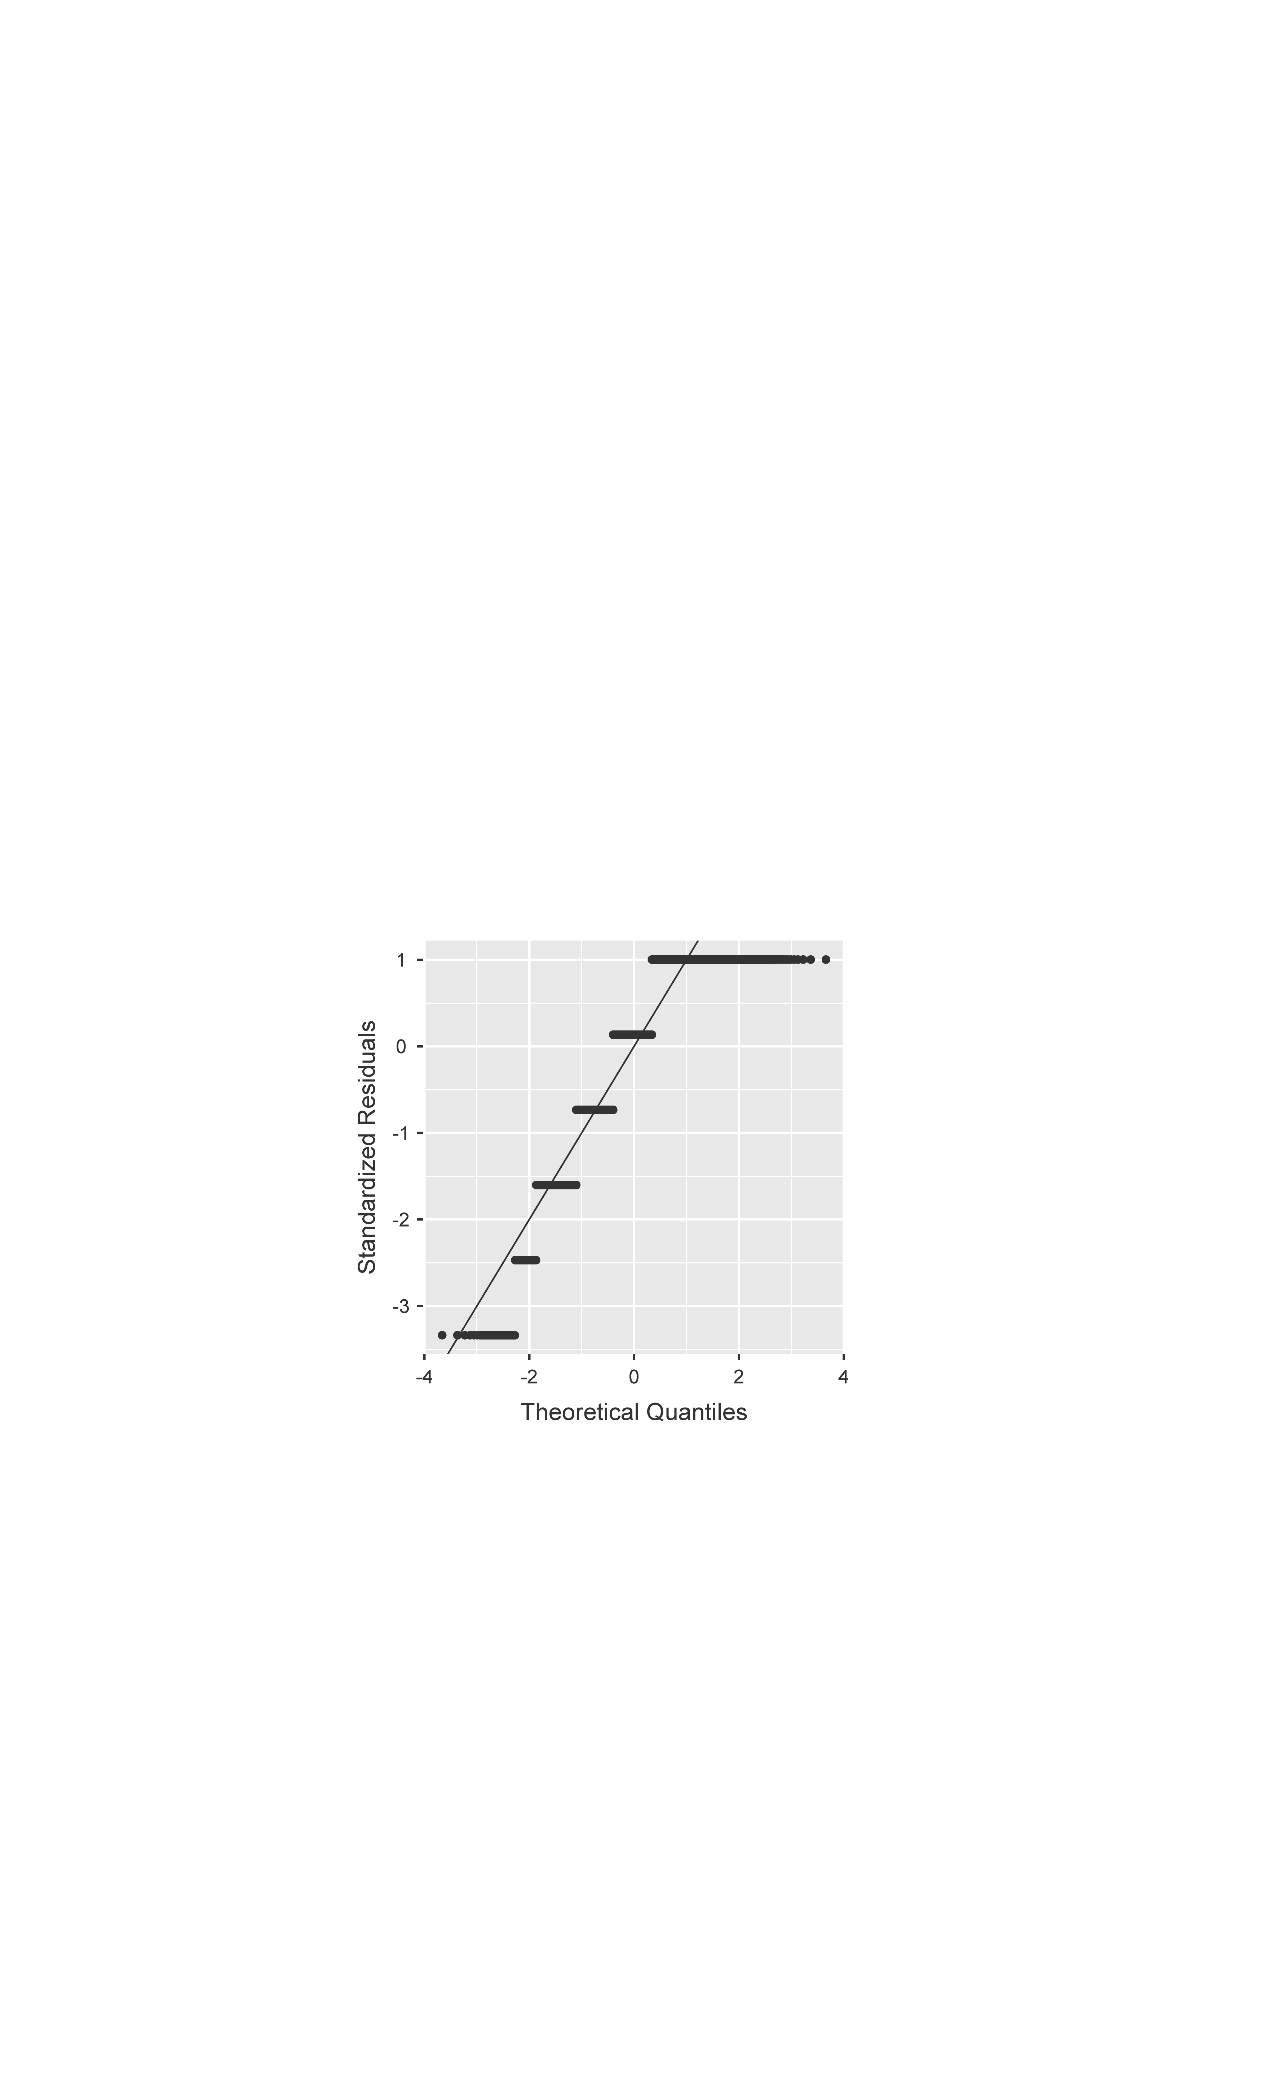
**

**PsyCap_14**

**
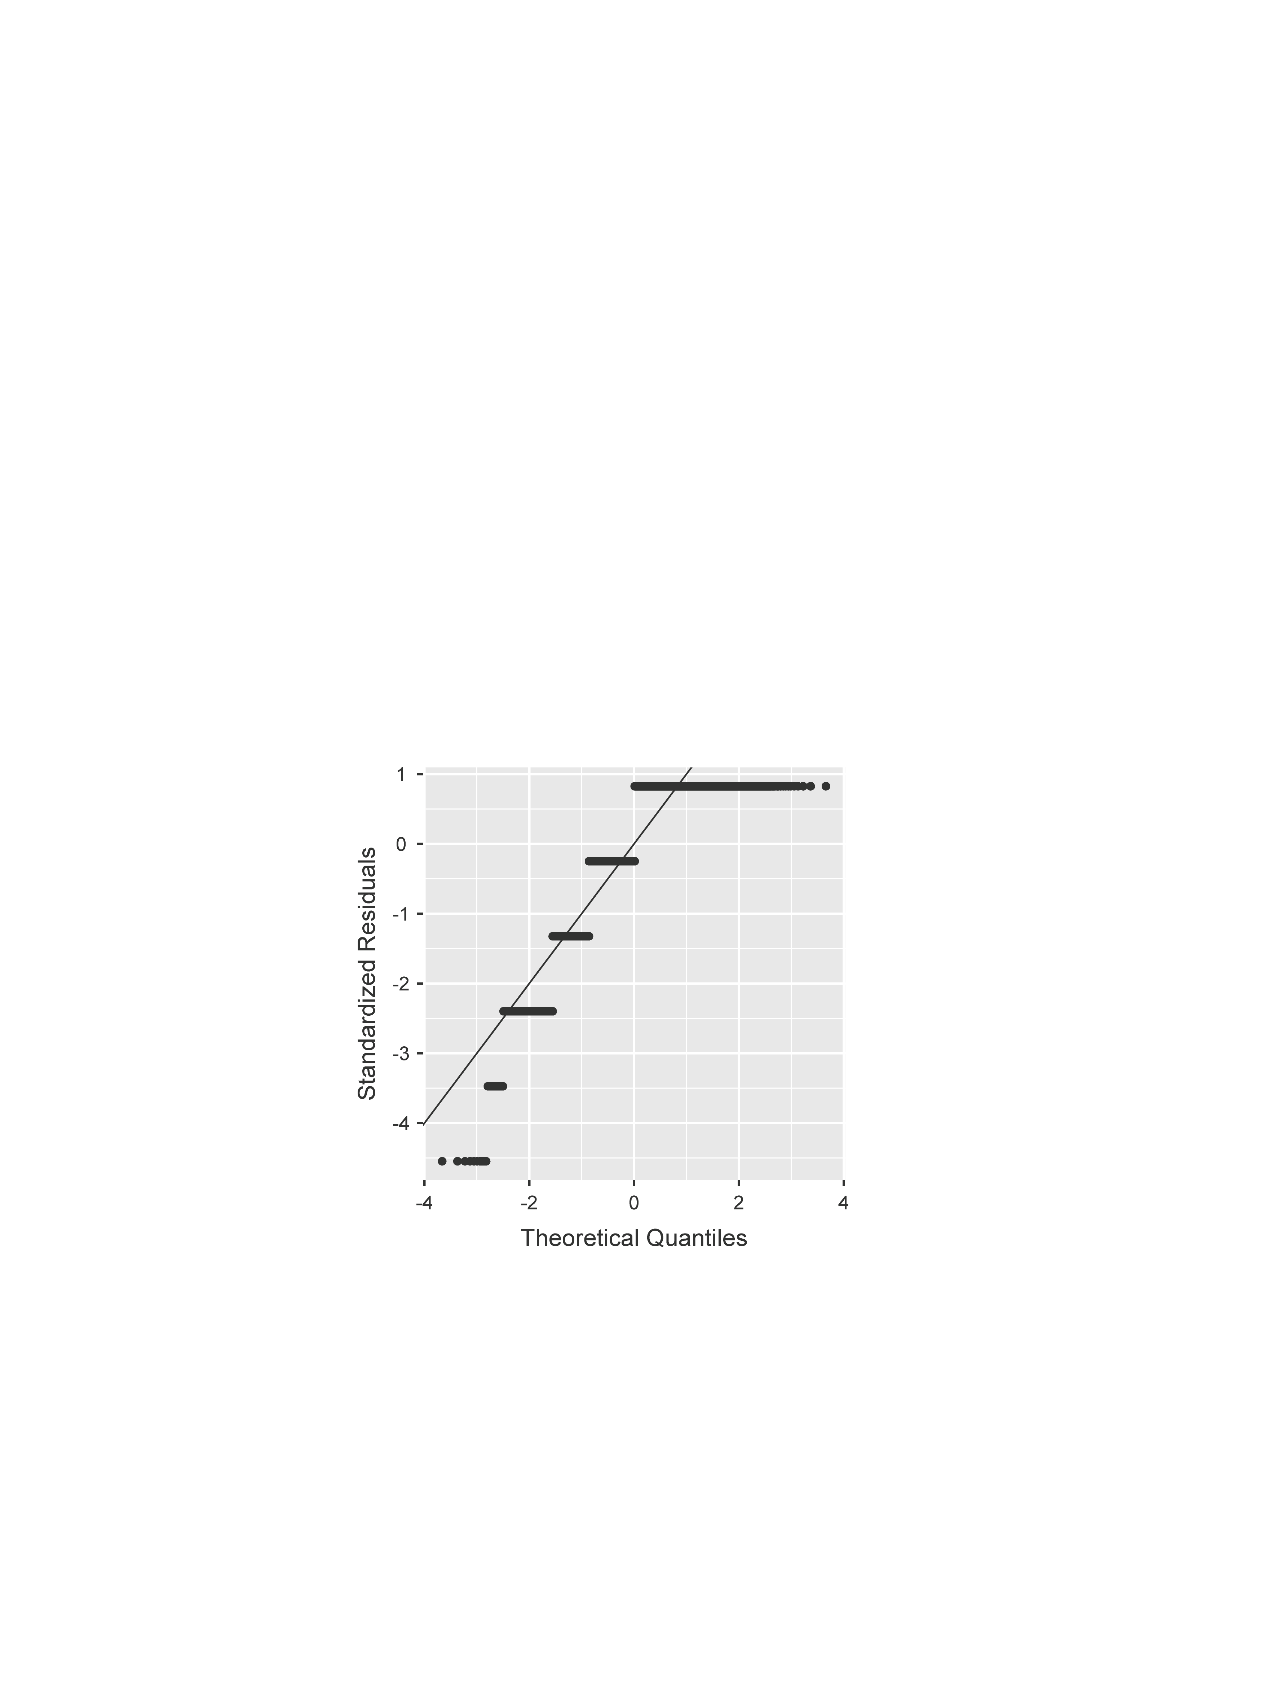
**

**PsyCap_15**

**
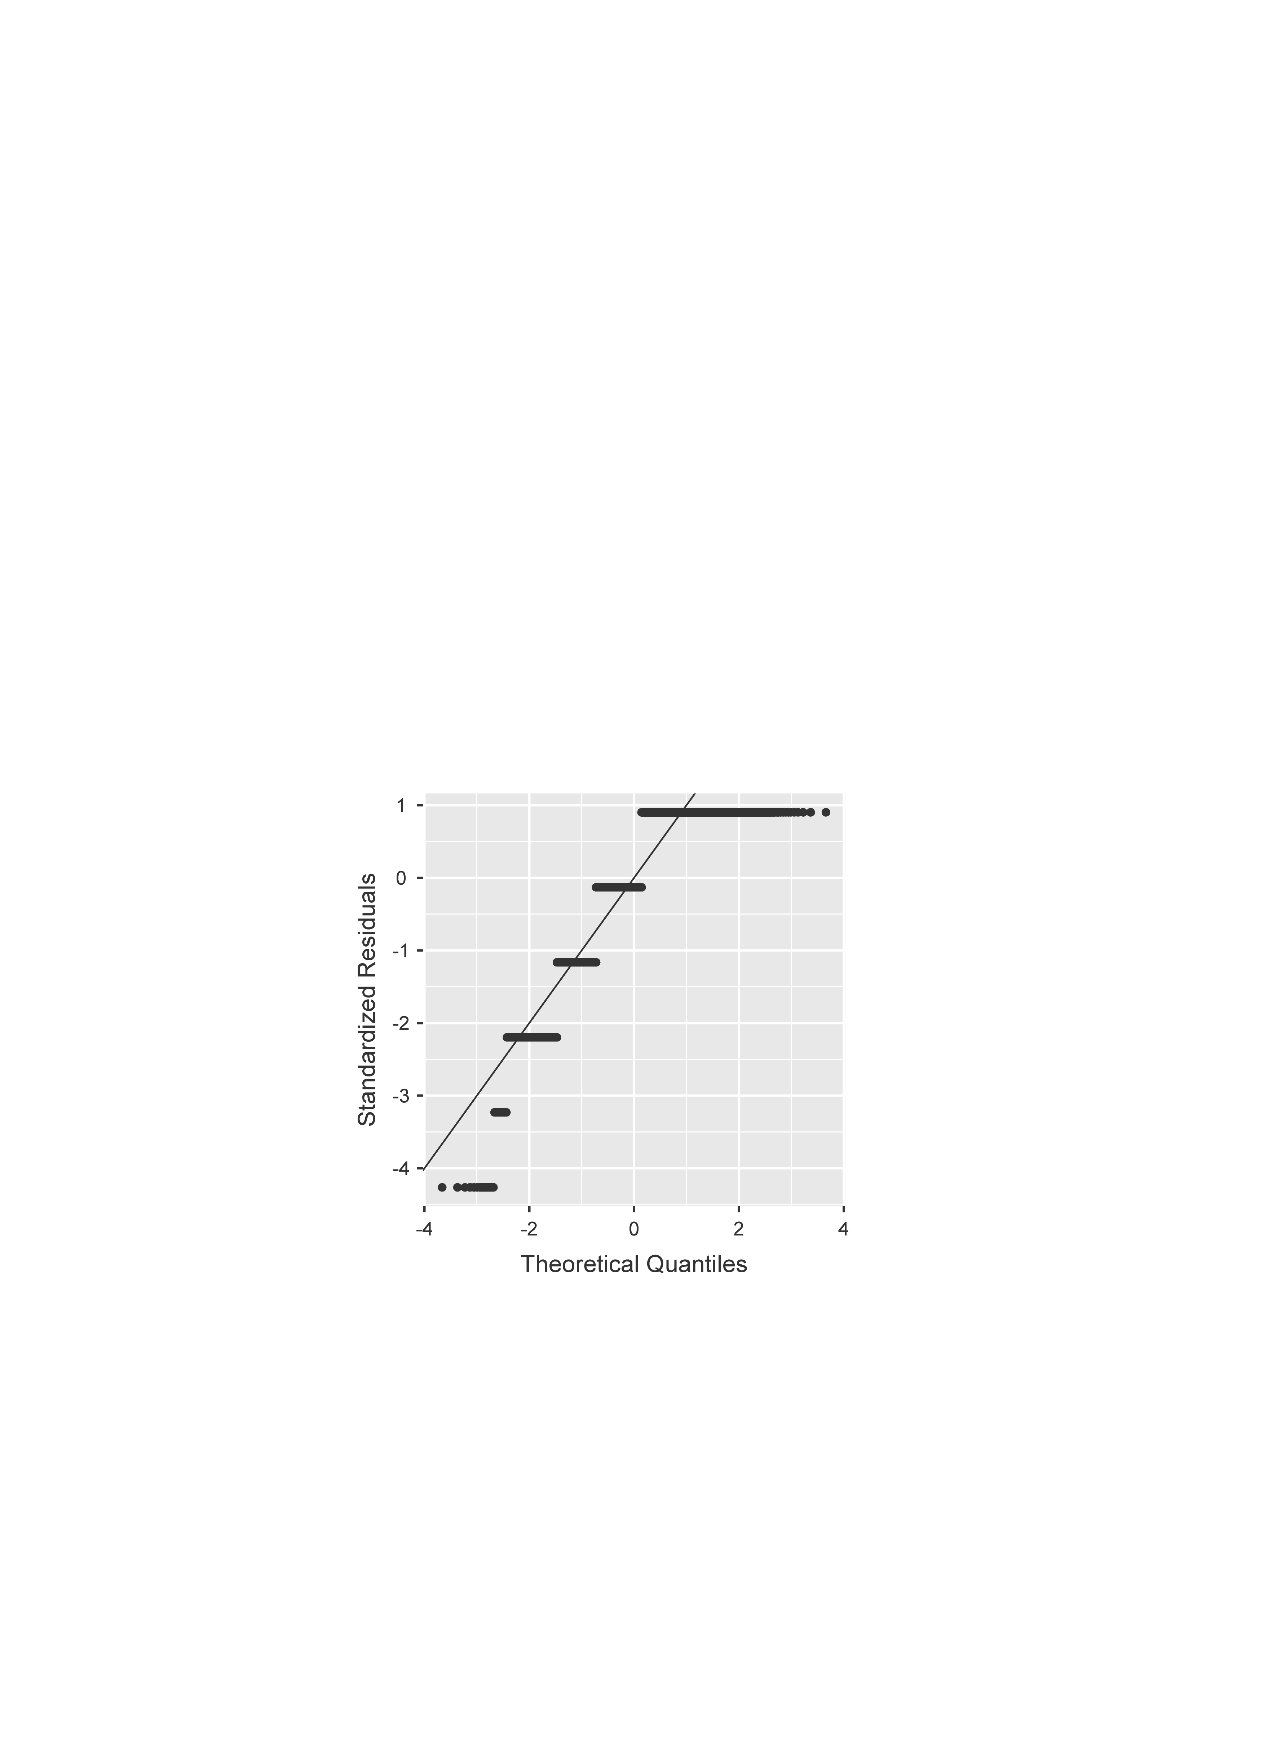
**

**PsyCap_16**

**
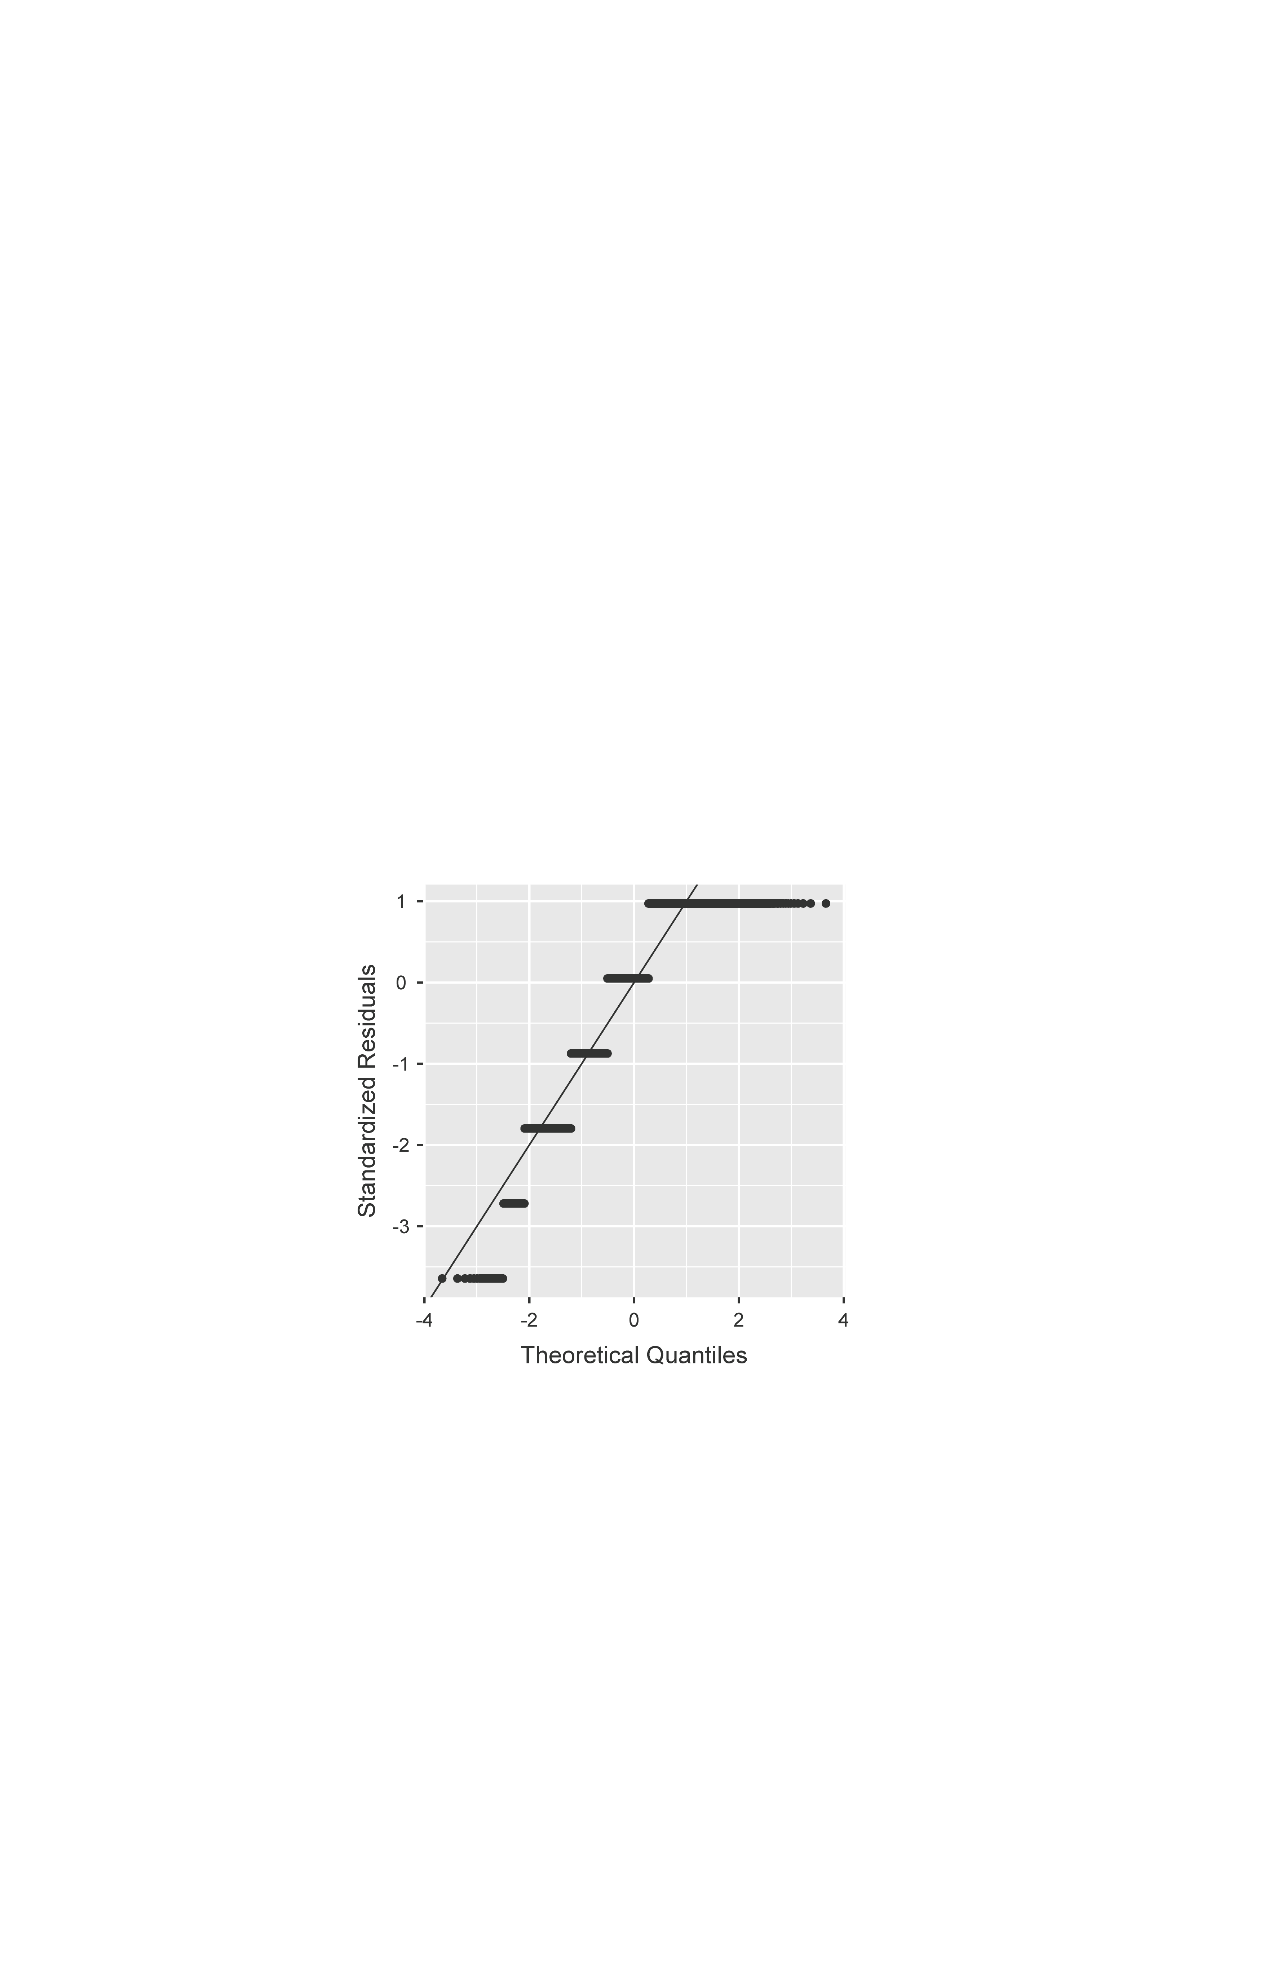
**

**PsyCap_17**

**
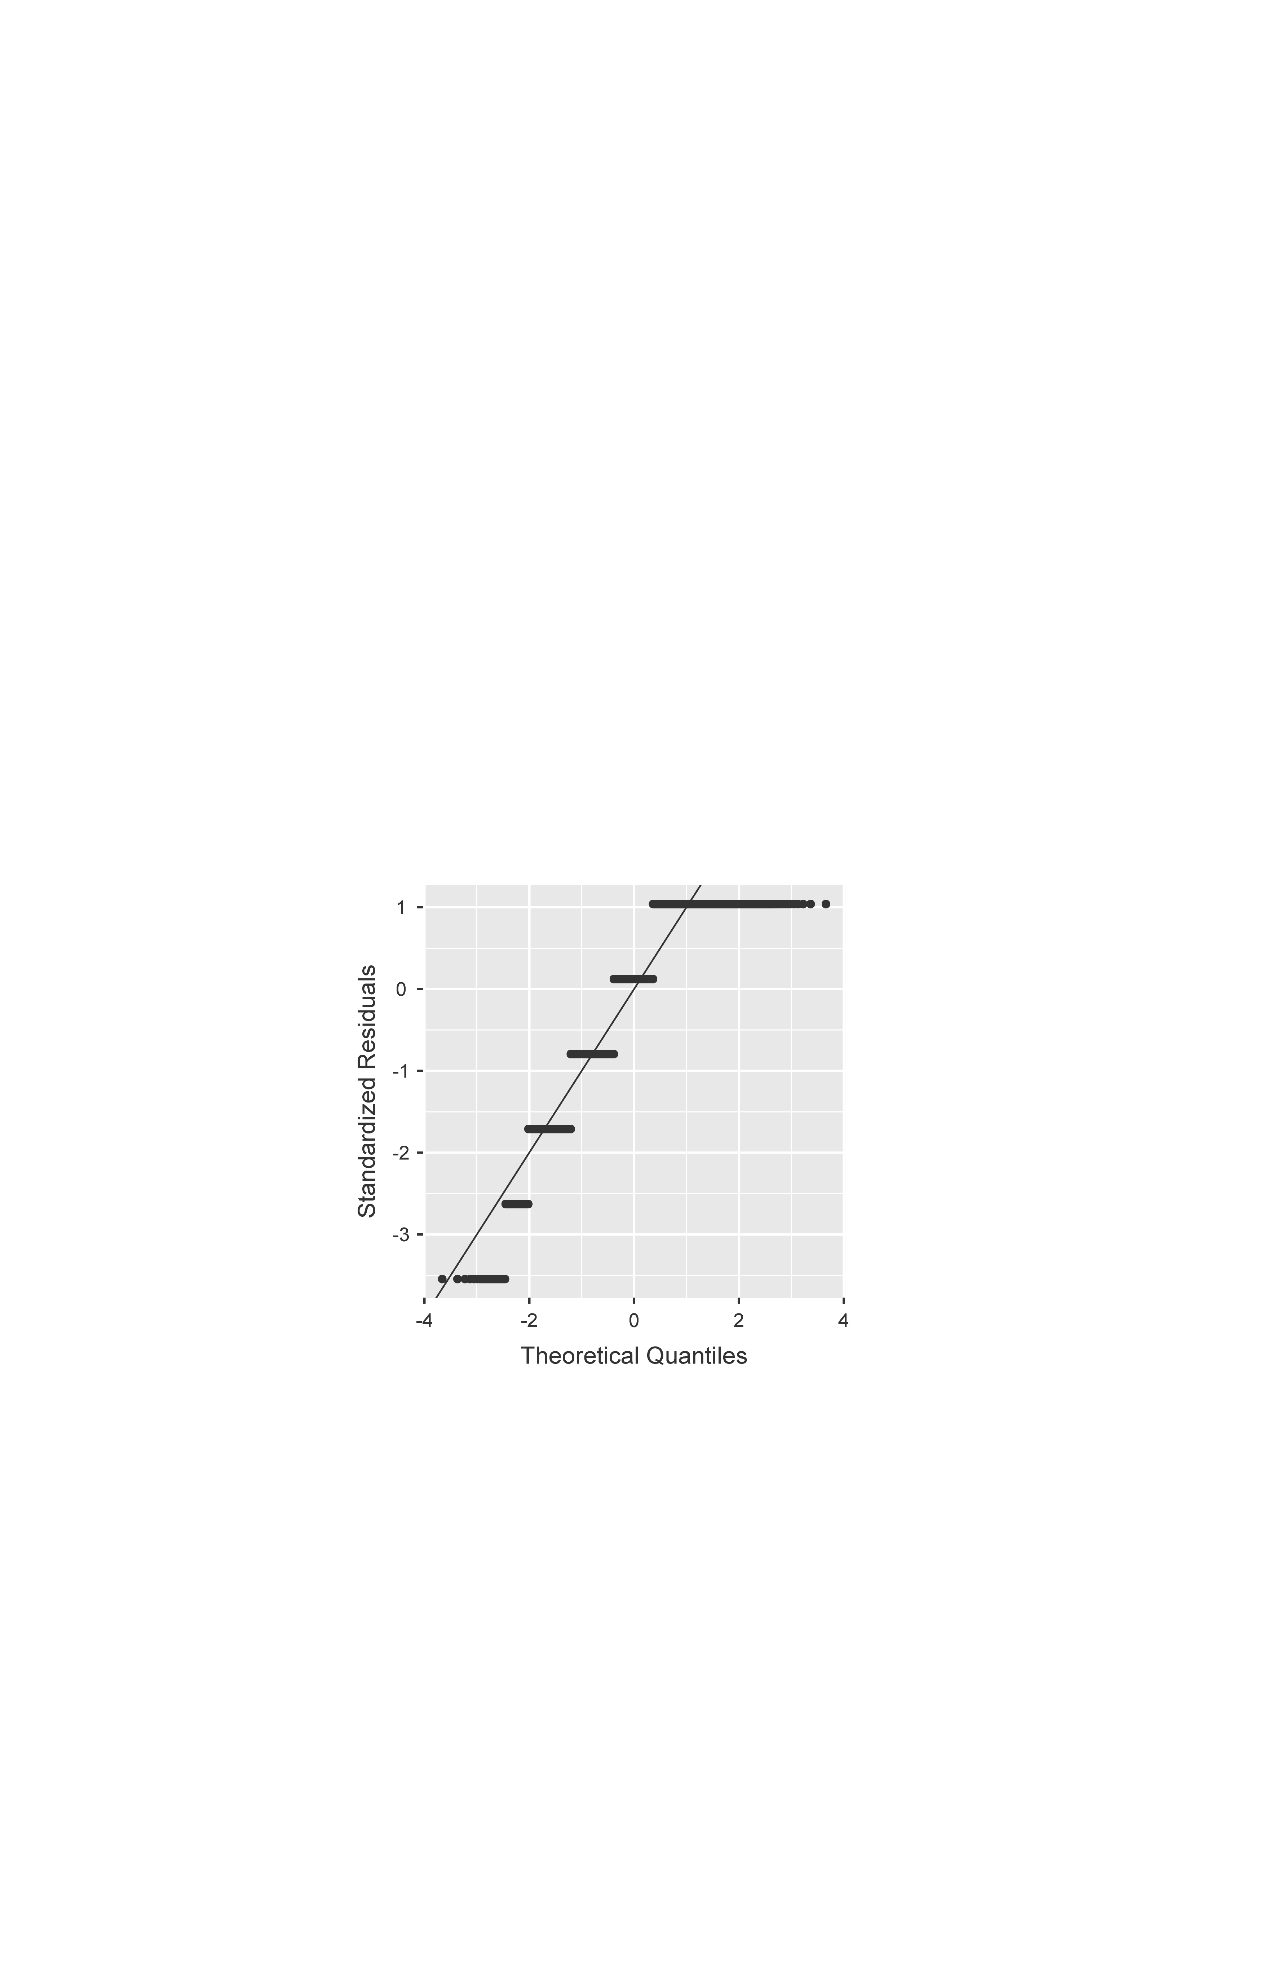
**

**PsyCap_18**

**
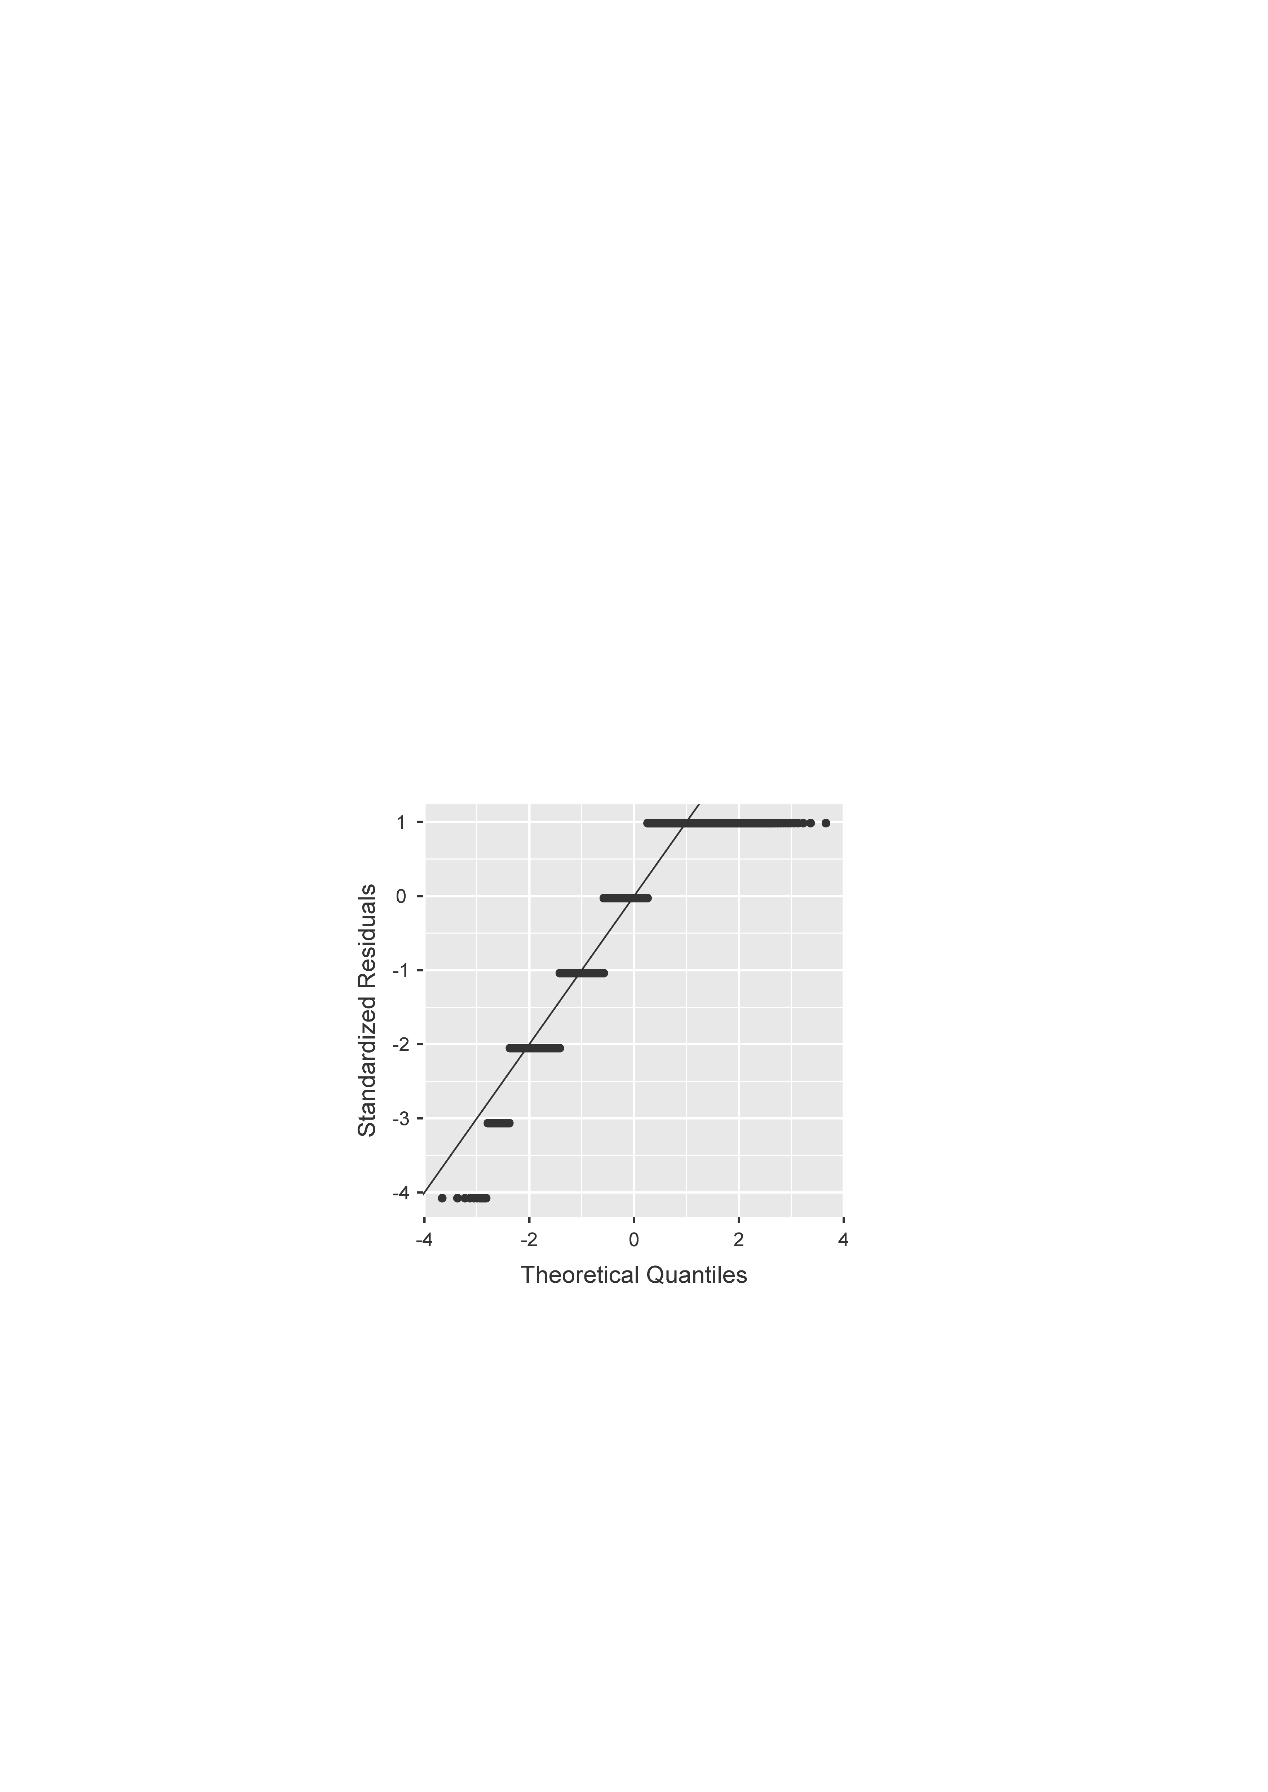
**

**PsyCap_19**

**
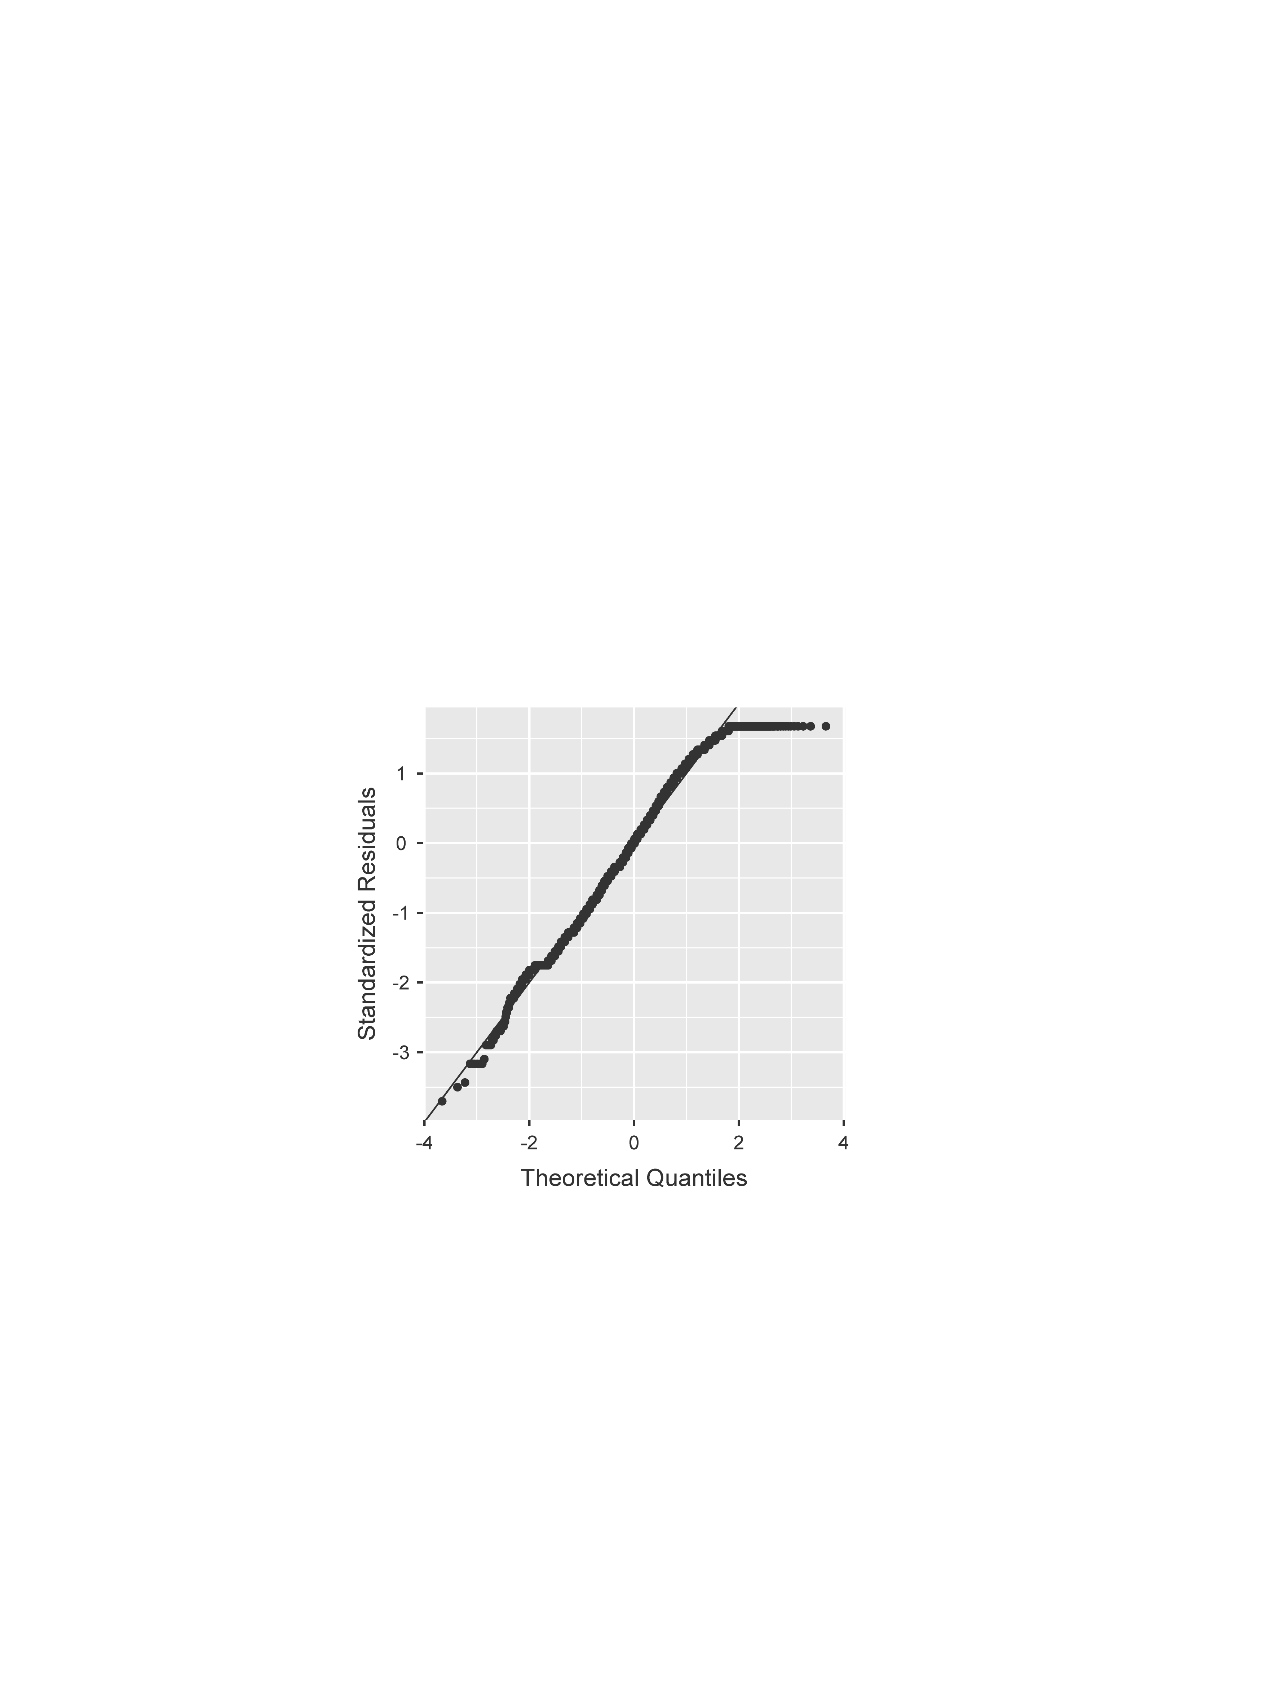
**

**PsyCap_mean**

**Appendix** **Fig. 3** Q-Q plots are used to test the data distribution of various items related to burnout and PsyCap, including their means.


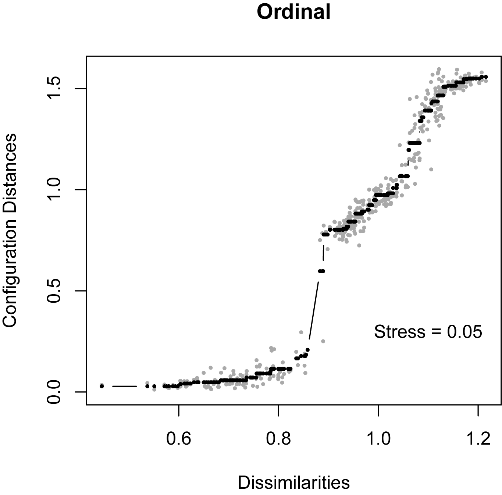

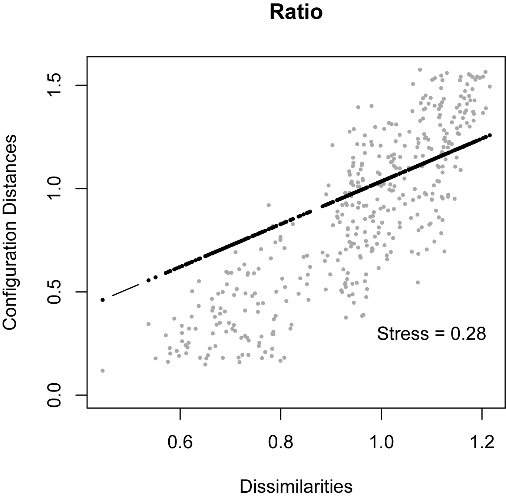

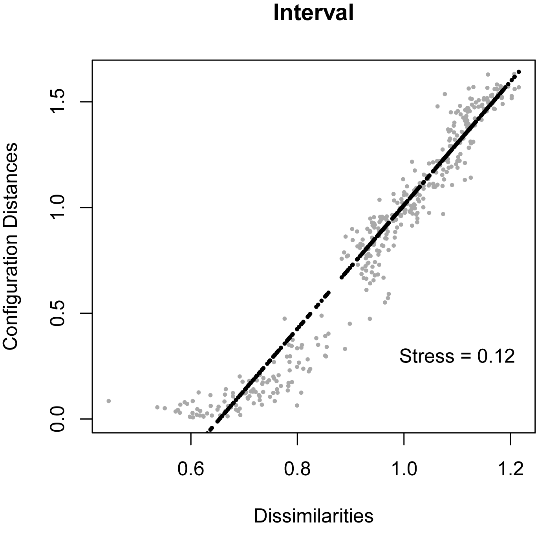

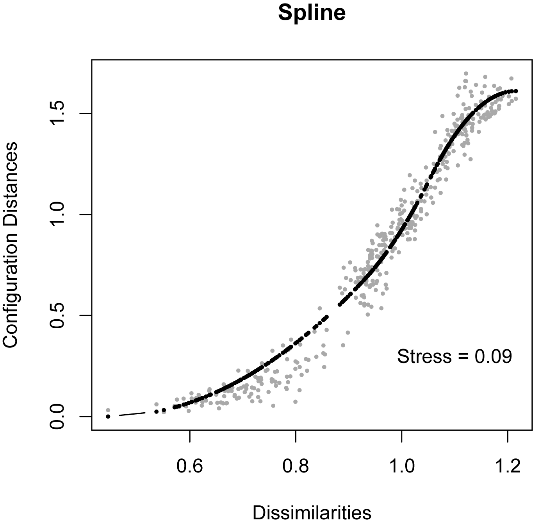


**Appendix** **Fig. 4** Shepard Diagrams visualizing the MDS fit.

**
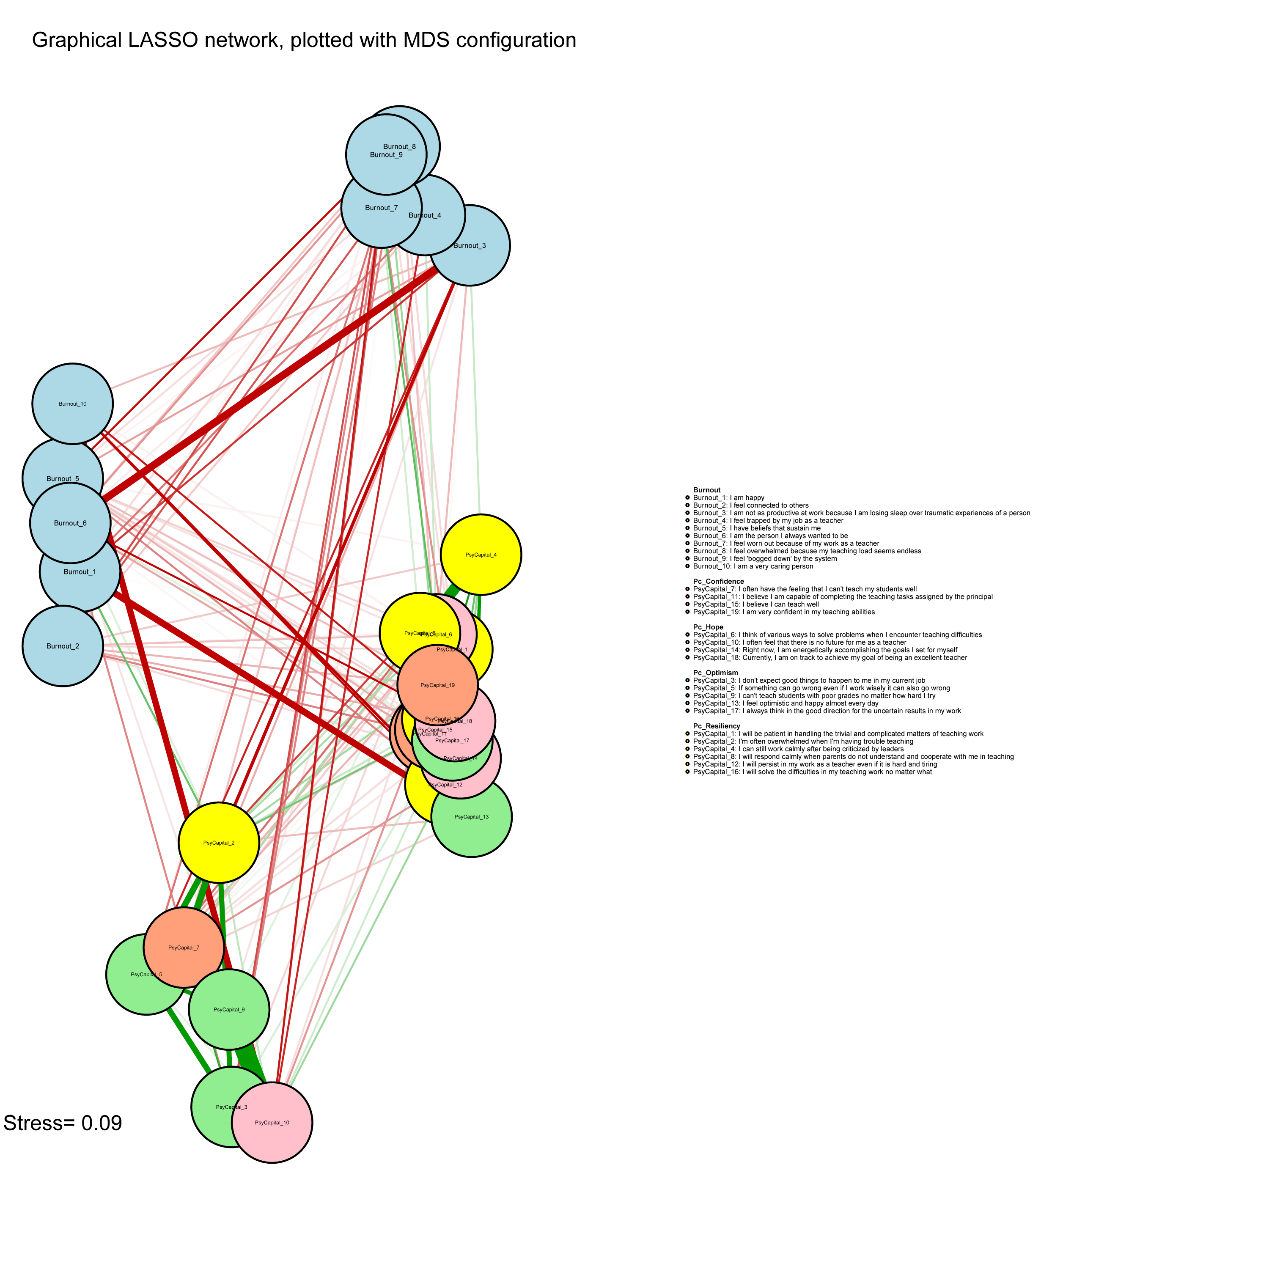
**

**Appendix** **Fig. 5** Multidimensional scaling depicts distances between points in a low-dimensional space as the proximities between variables (light blue = burnout; light salmon = the confidence dimension of PsyCap; pink = the hope dimension of PsyCap; light green = the optimism dimension of PsyCap; yellow = the resiliency dimension of PsyCap). The color of the edges represents the value of correlation (green = positive; red = negative)
